# Supplementary material for: Combined Transcriptomic and Metabolomic Approach Revealed a Relationship between Light Control, Photoprotective Pigments, and Lipid Biosynthesis in Olives
Source: Int J Mol Sci. 2023 Sep 22;24(19):14448. doi: 10.3390/ijms241914448 (PMC10572622; doi:10.3390/ijms241914448)
Supplement: Supplementary file 1 [file ijms-24-14448-s001.zip › Supplementary Tables.xlsx]

## Sheet: Table S1
Table S1. Primers panel coordinates. The original target transcript code from Farga (Version 6, Cruz et al., 2016), the 5’ end and the 3’ end position of the left and right primers, together with the full amplified fragment ranges, are reported.
Gene_ID	Left primer 5' end	Left primer 3' end	Right primer 3' end	Right primer 5' end	Transcript_ID	Function/Panel	Annotation
OE6A000646	316	335	433	455	OE6A000646T1	Fatty Acids	biotin carboxyl carrier of acetyl- carboxylase, chloroplastic-like
OE6A001246	242	271	358	380	OE6A001246T1	Fatty Acids	phospholipid:diacylglycerol acyltransferase 2
OE6A002165	544	566	653	675	OE6A002165T1	Fatty Acids	stearoyl-[acyl-carrier- ] 9-desaturase 6, chloroplastic
OE6A003919	1	22	104	130	OE6A003919T1	Fatty Acids	3-ketoacyl- synthase 6
OE6A005200	790	814	902	929	OE6A005200T1	Fatty Acids	glycerol-3-phosphate acyltransferase 1
OE6A006862	542	559	661	681	OE6A006862T1	Fatty Acids	lysophospholipid acyltransferase 1-like
OE6A006862	517	534	636	656	OE6A006862T3	Fatty Acids	lysophospholipid acyltransferase 1-like
OE6A007392	236	260	351	375	OE6A007392T1	Fatty Acids	phospholipid:diacylglycerol acyltransferase 1-like
OE6A007392	1028	1047	1143	1167	OE6A007392T2	Fatty Acids	phospholipid:diacylglycerol acyltransferase 1-like
OE6A007594	275	300	378	403	OE6A007594T1	Fatty Acids	very-long-chain enoyl- reductase-like
OE6A011870	160	188	274	297	OE6A011870T1	Fatty Acids	delta(12)-fatty-acid desaturase FAD2-like
OE6A012224	653	680	773	790	OE6A012224T1	Fatty Acids	glycerol-3-phosphate acyltransferase 5-like
OE6A012604	947	969	1062	1086	OE6A012604T1	Fatty Acids	3-ketoacyl- synthase 20-like
OE6A012975	302	324	409	437	OE6A012975T1	Fatty Acids	stearoyl-[acyl-carrier- ] 9-desaturase, chloroplastic
OE6A013923	470	498	579	609	OE6A013923T1	Fatty Acids	3-ketoacyl- synthase 15-like
OE6A015960	4	30	118	143	OE6A015960T1	Fatty Acids	phospholipid:diacylglycerol acyltransferase 1
OE6A018229	309	338	418	444	OE6A018229T1	Fatty Acids	biotin carboxylase 1, chloroplastic
OE6A018229	309	338	418	444	OE6A018229T2	Fatty Acids	biotin carboxylase 1, chloroplastic
OE6A018229	309	338	418	444	OE6A018229T3	Fatty Acids	biotin carboxylase 1, chloroplastic
OE6A018229	309	338	418	444	OE6A018229T4	Fatty Acids	biotin carboxylase 1, chloroplastic
OE6A018491	639	663	752	778	OE6A018491T1	Fatty Acids	oleoyl-acyl carrier thioesterase 1, chloroplastic-like
OE6A018491	639	663	752	778	OE6A018491T2	Fatty Acids	oleoyl-acyl carrier thioesterase 1, chloroplastic-like
OE6A018491	640	664	753	779	OE6A018491T5	Fatty Acids	oleoyl-acyl carrier thioesterase 1, chloroplastic-like
OE6A019860	167	199	264	291	OE6A019860T1	Fatty Acids	phospholipid:diacylglycerol acyltransferase 2
OE6A020845	1820	1846	1939	1959	OE6A020845T1	Fatty Acids	stearoyl-[acyl-carrier- ] 9-desaturase, chloroplastic
OE6A020845	415	433	519	548	OE6A020845T2	Fatty Acids	stearoyl-[acyl-carrier- ] 9-desaturase, chloroplastic
OE6A026016	28	56	125	155	OE6A026016T1	Fatty Acids	3-ketoacyl- synthase 6
OE6A027613	1	23	100	126	OE6A027613T1	Fatty Acids	3-ketoacyl- synthase 4-like
OE6A029462	16	44	114	144	OE6A029462T1	Fatty Acids	3-ketoacyl- synthase 6
OE6A030845	460	477	575	599	OE6A030845T1	Fatty Acids	glycerol-3-phosphate acyltransferase, chloroplastic
OE6A033757	199	233	316	338	OE6A033757T2	Fatty Acids	glycerol-3-phosphate acyltransferase 3
OE6A034317	11	32	127	150	OE6A034317T1	Fatty Acids	biotin carboxyl carrier of acetyl- carboxylase 1
OE6A034317	11	32	127	150	OE6A034317T2	Fatty Acids	biotin carboxyl carrier of acetyl- carboxylase 1
OE6A042043	265	286	380	403	OE6A042043T1	Fatty Acids	acetyl-coenzyme A carboxylase carboxyl transferase subunit alpha
OE6A042315	312	336	427	450	OE6A042315T1	Fatty Acids	3-ketoacyl- synthase 6
OE6A044469	347	375	460	486	OE6A044469T1	Fatty Acids	3-ketoacyl- synthase 6
OE6A045205	1	31	112	137	OE6A045205T1	Fatty Acids	3-ketoacyl- synthase 6-like
OE6A046773	304	321	419	442	OE6A046773T2	Fatty Acids	biotin carboxyl carrier of acetyl- carboxylase 1, chloroplastic-like
OE6A046773	358	375	473	496	OE6A046773T3	Fatty Acids	biotin carboxyl carrier of acetyl- carboxylase 1, chloroplastic-like
OE6A048475	8	35	122	147	OE6A048475T1	Fatty Acids	stearoyl-[acyl-carrier- ] 9-desaturase, chloroplastic
OE6A048706	343	370	452	482	OE6A048706T1	Fatty Acids	3-ketoacyl- synthase 4
OE6A051290	160	188	274	297	OE6A051290T1	Fatty Acids	delta(12)-fatty-acid desaturase FAD2-like
OE6A052690	35	55	140	161	OE6A052690T1	Fatty Acids	3-ketoacyl- synthase 11-like
OE6A054505	595	617	702	734	OE6A054505T1	Fatty Acids	3-oxoacyl-[acyl-carrier- ] synthase 3 A
OE6A055531	160	182	276	299	OE6A055531T3	Fatty Acids	acetyl-coenzyme A carboxylase carboxyl transferase subunit alpha
OE6A055588	83	100	198	221	OE6A055588T1	Fatty Acids	biotin carboxyl carrier of acetyl- carboxylase 1
OE6A056459	9	32	130	148	OE6A056459T2	Fatty Acids	Malonyl- :ACP transacylase
OE6A057041	760	777	880	898	OE6A057041T1	Fatty Acids	phosphatidylcholine:diacylglycerol cholinephosphotransferase 1-like
OE6A057041	760	777	880	898	OE6A057041T2	Fatty Acids	phosphatidylcholine:diacylglycerol cholinephosphotransferase 1-like
OE6A057230	1212	1234	1319	1349	OE6A057230T1	Fatty Acids	probable glycerol-3-phosphate acyltransferase 3
OE6A057837	168	197	280	302	OE6A057837T2	Fatty Acids	enoyl-[acyl-carrier- ] reductase [NADH] 1, chloroplastic-like
OE6A059595	595	615	705	732	OE6A059595T1	Fatty Acids	oleoyl-acyl carrier thioesterase 1, chloroplastic-like
OE6A059595	595	615	705	732	OE6A059595T2	Fatty Acids	oleoyl-acyl carrier thioesterase 1, chloroplastic-like
OE6A059595	595	615	705	732	OE6A059595T3	Fatty Acids	oleoyl-acyl carrier thioesterase 1, chloroplastic-like
OE6A060413	486	511	599	623	OE6A060413T1	Fatty Acids	very-long-chain enoyl- reductase-like
OE6A060989	12	41	126	149	OE6A060989T1	Fatty Acids	3-ketoacyl- synthase 17-like
OE6A063529	331	353	441	469	OE6A063529T1	Fatty Acids	very-long-chain enoyl- reductase-like
OE6A065022	202	223	317	341	OE6A065022T1	Fatty Acids	3-ketoacyl- synthase 7
OE6A065720	783	807	902	922	OE6A065720T1	Fatty Acids	very-long-chain enoyl- reductase
OE6A065720	242	270	350	375	OE6A065720T2	Fatty Acids	very-long-chain enoyl- reductase
OE6A068286	99	127	217	237	OE6A068286T1	Fatty Acids	phospholipid:diacylglycerol acyltransferase 2
OE6A071537	1868	1898	1972	2006	OE6A071537T1	Fatty Acids	lysophospholipid acyltransferase 1-like
OE6A076944	120	153	225	258	OE6A076944T1	Fatty Acids	glycerol-3-phosphate acyltransferase 5-like
OE6A077444	297	327	410	433	OE6A077444T2	Fatty Acids	glycerol-3-phosphate acyltransferase 3
OE6A077716	646	675	755	785	OE6A077716T1	Fatty Acids	very-long-chain enoyl- reductase-like
OE6A078092	714	736	830	853	OE6A078092T1	Fatty Acids	phospholipid:diacylglycerol acyltransferase 1-like
OE6A080950	272	296	378	408	OE6A080950T1	Fatty Acids	3-ketoacyl- synthase 12-like
OE6A082932	558	580	660	682	OE6A082932T1	Fatty Acids	3-ketoacyl- synthase 2-like
OE6A083455	816	838	921	951	OE6A083455T1	Fatty Acids	glycerol-3-phosphate acyltransferase 1
OE6A085290	61	89	174	200	OE6A085290T1	Fatty Acids	delta(12)-fatty-acid desaturase FAD2-like
OE6A086426	1	26	115	140	OE6A086426T1	Fatty Acids	very-long-chain enoyl- reductase-like
OE6A087198	373	390	493	512	OE6A087198T1	Fatty Acids	biotin carboxyl carrier of acetyl- carboxylase,
OE6A087198	3	21	119	142	OE6A087198T3	Fatty Acids	biotin carboxyl carrier of acetyl- carboxylase,
OE6A089288	787	809	896	924	OE6A089288T1	Fatty Acids	3-ketoacyl- synthase 11-like
OE6A089375	77	99	189	216	OE6A089375T1	Fatty Acids	probable glycerol-3-phosphate acyltransferase 3
OE6A089828	650	669	763	789	OE6A089828T1	Fatty Acids	stearoyl-[acyl-carrier- ] 9-desaturase, chloroplastic
OE6A090531	1080	1102	1179	1205	OE6A090531T1	Fatty Acids	3-ketoacyl- synthase 20-like
OE6A092496	360	383	475	498	OE6A092496T1	Fatty Acids	biotin carboxyl carrier of acetyl- carboxylase 1
OE6A093605	1232	1251	1351	1371	OE6A093605T1	Fatty Acids	phospholipid:diacylglycerol acyltransferase 2
OE6A094908	895	921	1007	1034	OE6A094908T1	Fatty Acids	3-ketoacyl- synthase 20-like
OE6A094910	771	798	879	909	OE6A094910T1	Fatty Acids	3-ketoacyl- synthase 6
OE6A095383	7	27	101	133	OE6A095383T1	Fatty Acids	3-ketoacyl- synthase 4
OE6A095422	434	455	539	572	OE6A095422T1	Fatty Acids	acetyl-coenzyme A carboxylase carboxyl transferase subunit alpha, chloroplastic-like isoform X1
OE6A095625	202	223	317	341	OE6A095625T1	Fatty Acids	3-ketoacyl- synthase 7
OE6A096376	951	978	1059	1085	OE6A096376T1	Fatty Acids	3-ketoacyl- synthase 20-like
OE6A096543	107	132	221	246	OE6A096543T1	Fatty Acids	probable 3-ketoacyl- synthase 21
OE6A097178	195	220	304	332	OE6A097178T1	Fatty Acids	acetyl-coenzyme A carboxylase carboxyl transferase subunit alpha
OE6A097211	7	37	115	137	OE6A097211T1	Fatty Acids	3-ketoacyl- synthase 6
OE6A098105	404	431	519	543	OE6A098105T1	Fatty Acids	3-hydroxyacyl-[acyl-carrier- ] dehydratase -like
OE6A101179	223	252	340	362	OE6A101179T3	Fatty Acids	glycerol-3-phosphate acyltransferase 3
OE6A102888	650	675	769	786	OE6A102888T1	Fatty Acids	glycerol-3-phosphate acyltransferase 5-like
OE6A102979	107	134	214	241	OE6A102979T1	Fatty Acids	phospholipid:diacylglycerol acyltransferase 2
OE6A104748	216	244	326	350	OE6A104748T2	Fatty Acids	enoyl-[acyl-carrier- ] reductase [NADH], chloroplastic-like
OE6A106926	10	35	121	149	OE6A106926T1	Fatty Acids	3-ketoacyl- synthase 19
OE6A106926	1	26	96	130	OE6A106926T2	Fatty Acids	3-ketoacyl- synthase 19
OE6A109914	82	102	187	208	OE6A109914T1	Fatty Acids	3-ketoacyl- synthase 11
OE6A111314	386	414	493	523	OE6A111314T1	Fatty Acids	probable glycerol-3-phosphate acyltransferase 3
OE6A111671	29	56	138	168	OE6A111671T1	Fatty Acids	3-ketoacyl- synthase 3-like
OE6A112905	96	119	205	234	OE6A112905T1	Fatty Acids	biotin carboxyl carrier of acetyl- carboxylase, chloroplastic-like
OE6A114340	669	699	784	808	OE6A114340T1	Fatty Acids	enoyl-[acyl-carrier- ] reductase [NADH]
OE6A115934	306	330	414	445	OE6A115934T1	Fatty Acids	biotin carboxyl carrier of acetyl- carboxylase 1, chloroplastic-like
OE6A115934	1133	1150	1234	1259	OE6A115934T2	Fatty Acids	biotin carboxyl carrier of acetyl- carboxylase 1, chloroplastic-like
OE6A115934	275	297	391	413	OE6A115934T4	Fatty Acids	biotin carboxyl carrier of acetyl- carboxylase 1, chloroplastic-like
OE6A117316	404	429	519	541	OE6A117316T2	Fatty Acids	3-hydroxyacyl-[acyl-carrier- ] dehydratase -like
OE6A117578	230	253	343	368	OE6A117578T1	Fatty Acids	very-long-chain enoyl- reductase
OE6A117830	141	167	258	280	OE6A117830T1	Fatty Acids	phospholipid:diacylglycerol acyltransferase 2
OE6A118450	455	479	573	594	OE6A118450T1	Fatty Acids	stearoyl-[acyl-carrier- ] 9-desaturase, chloroplastic
OE6A118450	303	324	420	442	OE6A118450T2	Fatty Acids	stearoyl-[acyl-carrier- ] 9-desaturase, chloroplastic
OE6A118580	112	137	221	251	OE6A118580T1	Fatty Acids	biotin carboxylase 1
OE6A118580	112	137	221	251	OE6A118580T2	Fatty Acids	biotin carboxylase 1
OE6A118580	112	137	221	251	OE6A118580T3	Fatty Acids	biotin carboxylase 1
OE6A120716	1	27	101	127	OE6A120716T2	Fatty Acids	phospholipid:diacylglycerol acyltransferase 2
OE6A001536	1	19	109	133	OE6A001536T3	Phenylpropanoids	methylecgonone reductase-like
OE6A005638	553	575	670	692	OE6A005638T1	Phenylpropanoids	naringenin,2-oxoglutarate 3-dioxygenase
OE6A011825	730	755	844	866	OE6A011825T1	Phenylpropanoids	leucoanthocyanidin reductase
OE6A012483	17	39	111	141	OE6A012483T3	Phenylpropanoids	chalcone synthase (CHS)
OE6A019673	31	63	146	170	OE6A019673T1	Phenylpropanoids	flavonol synthase (FLS)
OE6A019673	470	489	579	609	OE6A019673T2	Phenylpropanoids	flavonol synthase (FLS)
OE6A031666	7	35	125	146	OE6A031666T1	Phenylpropanoids	cinnamoyl- reductase 1-like
OE6A035509	341	374	454	480	OE6A035509T1	Phenylpropanoids	anthocyanidin reductase (ANR)
OE6A036480	1069	1086	1186	1208	OE6A036480T1	Phenylpropanoids	4-coumarate-- ligase 1 (4CL)
OE6A037235	1	22	99	127	OE6A037235T1	Phenylpropanoids	trans-resveratrol di-O-methyltransferase-like
OE6A037235	1	22	99	127	OE6A037235T2	Phenylpropanoids	trans-resveratrol di-O-methyltransferase-like
OE6A040780	65	88	172	201	OE6A040780T1	Phenylpropanoids	flavonol synthase
OE6A048352	259	282	375	395	OE6A048352T1	Phenylpropanoids	naringenin,2-oxoglutarate 3-dioxygenase
OE6A053999	1300	1318	1414	1433	OE6A053999T1	Phenylpropanoids	UDP-glucose flavonoid 3-O-glucosyltransferase 6-like
OE6A055813	1600	1622	1717	1739	OE6A055813T1	Phenylpropanoids	flavonol synthase flavanone 3-hydroxylase-like
OE6A059983	210	234	322	348	OE6A059983T1	Phenylpropanoids	caffeoyl- O-methyltransferase
OE6A059983	210	234	322	348	OE6A059983T2	Phenylpropanoids	caffeoyl- O-methyltransferase
OE6A061313	60	82	176	199	OE6A061313T1	Phenylpropanoids	anthocyanidin reductase (ANR)
OE6A065069	552	572	664	691	OE6A065069T1	Phenylpropanoids	flavonol synthase flavanone 3-hydroxylase-like (F3H)
OE6A065273	396	422	508	534	OE6A065273T1	Phenylpropanoids	probable cinnamyl alcohol dehydrogenase (CAD)
OE6A065273	244	270	356	382	OE6A065273T2	Phenylpropanoids	probable cinnamyl alcohol dehydrogenase (CAD)
OE6A066812	152	176	265	291	OE6A066812T2	Phenylpropanoids	chalcone isomerase
OE6A074153	56	78	164	192	OE6A074153T1	Phenylpropanoids	cinnamoyl- reductase 1-like
OE6A074408	1170	1188	1284	1303	OE6A074408T1	Phenylpropanoids	UDP-glucose flavonoid 3-O-glucosyltransferase 3
OE6A081102	504	533	619	643	OE6A081102T1	Phenylpropanoids	leucoanthocyanidin dioxygenase
OE6A081156	1	21	119	139	OE6A081156T1	Phenylpropanoids	flavone synthase II
OE6A081156	614	642	725	753	OE6A081156T2	Phenylpropanoids	flavone synthase II
OE6A082229	181	198	294	319	OE6A082229T1	Phenylpropanoids	dihydroflavonol 4-reductase
OE6A083252	1	29	98	125	OE6A083252T1	Phenylpropanoids	trans-resveratrol di-O-methyltransferase-like
OE6A083978	513	541	626	651	OE6A083978T1	Phenylpropanoids	D-galacturonate reductase-like
OE6A083978	513	541	626	651	OE6A083978T2	Phenylpropanoids	D-galacturonate reductase-like
OE6A084700	46	68	151	174	OE6A084700T1	Phenylpropanoids	coumarate 3-hydroxylase (C3H)
OE6A089986	10	35	119	149	OE6A089986T1	Phenylpropanoids	probable cinnamyl alcohol dehydrogenase
OE6A089986	322	339	425	460	OE6A089986T2	Phenylpropanoids	probable cinnamyl alcohol dehydrogenase
OE6A090948	1	23	104	126	OE6A090948T1	Phenylpropanoids	caffeate O-methyltransferase (COMT)
OE6A095147	593	612	711	732	OE6A095147T1	Phenylpropanoids	phenylalanine ammonia-lyase
OE6A098022	168	189	284	307	OE6A098022T1	Phenylpropanoids	leucoanthocyanidin dioxygenase (LDOX)
OE6A098796	160	185	275	299	OE6A098796T1	Phenylpropanoids	cinnamate 4-hydroxylase (C4H)
OE6A100380	355	377	465	492	OE6A100380T1	Phenylpropanoids	non-functional NADPH-dependent codeinone reductase 2-like
OE6A101438	1	18	104	126	OE6A101438T1	Phenylpropanoids	ferulate 5-hydroxylase (F5H)
OE6A104547	54	71	171	192	OE6A104547T3	Phenylpropanoids	dihydroflavonol 4-reductase
OE6A105218	54	78	172	193	OE6A105218T1	Phenylpropanoids	flavonoid 3 -hydroxylase
OE6A105218	54	78	172	193	OE6A105218T2	Phenylpropanoids	flavonoid 3 -hydroxylase
OE6A106272	1	19	102	126	OE6A106272T1	Phenylpropanoids	trans-resveratrol di-O-methyltransferase-like
OE6A109123	40	65	151	179	OE6A109123T1	Phenylpropanoids	flavonol synthase flavanone 3-hydroxylase-like (F3H)
OE6A113723	73	90	186	211	OE6A113723T1	Phenylpropanoids	anthocyanidin reductase
OE6A115036	466	486	578	605	OE6A115036T1	Phenylpropanoids	flavonol synthase flavanone 3-hydroxylase-like (F3H)
OE6A117416	450	474	556	589	OE6A117416T1	Phenylpropanoids	cinnamoyl- reductase-like SNL6 isoform X2
OE6A005984	479	501	597	618	OE6A005984T4	Photoperception/Photosynthesis	cryptochrome DASH
OE6A007397	772	794	880	910	OE6A007397T2	Photoperception/Photosynthesis	LOV domain-containing
OE6A007411	2397	2419	2514	2536	OE6A007411T1	Photoperception/Photosynthesis	phytochrome C
OE6A008716	2451	2480	2557	2590	OE6A008716T1	Photoperception/Photosynthesis	FLOWERING LOCUS D
OE6A010456	87	114	200	224	OE6A010456T1	Photoperception/Photosynthesis	transcription factor PIL1-like
OE6A011613	395	421	491	520	OE6A011613T5	Photoperception/Photosynthesis	REVEILLE 1-like isoform X2
OE6A012335	337	366	439	465	OE6A012335T1	Photoperception/Photosynthesis	RNA polymerase sigma factor sigB
OE6A012821	9	39	107	136	OE6A012821T1	Photoperception/Photosynthesis	FAR-RED IMPAIRED RESPONSE 1-like
OE6A014858	683	707	799	821	OE6A014858T1	Photoperception/Photosynthesis	zinc finger CONSTANS-LIKE 11
OE6A015045	2332	2356	2444	2469	OE6A015045T1	Photoperception/Photosynthesis	phytochrome e
OE6A015569	524	555	637	659	OE6A015569T1	Photoperception/Photosynthesis	zinc finger CONSTANS-like
OE6A015647	620	644	740	759	OE6A015647T1	Photoperception/Photosynthesis	photosystem I reaction center subunit III, chloroplastic-like
OE6A017974	85	111	203	223	OE6A017974T1	Photoperception/Photosynthesis	LOV domain-containing
OE6A018659	6	29	107	130	OE6A018659T1	Photoperception/Photosynthesis	photosystem II reaction center W , chloroplastic-like
OE6A022651	148	166	262	286	OE6A022651T2	Photoperception/Photosynthesis	chlorophyll a-b binding of LHCII type 1
OE6A024133	576	596	693	715	OE6A024133T1	Photoperception/Photosynthesis	photosystem I reaction center subunit N, chloroplastic isoform X2
OE6A024312	90	122	206	229	OE6A024312T1	Photoperception/Photosynthesis	LHY-like isoform X1
OE6A024312	90	122	206	229	OE6A024312T10	Photoperception/Photosynthesis	LHY-like isoform X1
OE6A024819	44	67	160	182	OE6A024819T1	Photoperception/Photosynthesis	PHYTOCHROME KINASE SUBSTRATE 3-like
OE6A025196	33	60	140	170	OE6A025196T1	Photoperception/Photosynthesis	photosystem II repair PSB27-H1
OE6A028647	860	884	977	999	OE6A028647T2	Photoperception/Photosynthesis	RNA polymerase sigma factor sigA
OE6A028974	210	235	327	349	OE6A028974T1	Photoperception/Photosynthesis	photosystem I reaction center subunit psaK, chloroplastic
OE6A029393	311	337	424	449	OE6A029393T1	Photoperception/Photosynthesis	LOV domain-containing
OE6A033099	34	61	144	173	OE6A033099T1	Photoperception/Photosynthesis	MADS-box SOC1
OE6A035752	2386	2413	2499	2525	OE6A035752T1	Photoperception/Photosynthesis	phytochrome B
OE6A035887	258	282	376	397	OE6A035887T2	Photoperception/Photosynthesis	zinc finger CONSTANS-LIKE 1-like isoform X2
OE6A035887	298	328	394	422	OE6A035887T5	Photoperception/Photosynthesis	zinc finger CONSTANS-LIKE 1-like isoform X2
OE6A036399	782	814	896	919	OE6A036399T1	Photoperception/Photosynthesis	cryptochrome-1 isoform X1
OE6A037069	1	18	102	126	OE6A037069T2	Photoperception/Photosynthesis	PHOTOPERIOD-INDEPENDENT EARLY FLOWERING 1 isoform X1
OE6A037270	289	314	398	428	OE6A037270T3	Photoperception/Photosynthesis	RNA polymerase sigma factor sigF, chloroplastic isoform X2
OE6A044285	49	72	162	188	OE6A044285T1	Photoperception/Photosynthesis	FAR-RED ELONGATED HYPOCOTYL 3 isoform X1
OE6A044285	4730	4758	4851	4869	OE6A044285T10	Photoperception/Photosynthesis	FAR-RED ELONGATED HYPOCOTYL 3 isoform X1
OE6A045568	1401	1423	1498	1525	OE6A045568T1	Photoperception/Photosynthesis	SPA1-RELATED 2
OE6A047144	931	959	1039	1068	OE6A047144T1	Photoperception/Photosynthesis	EARLY FLOWERING 3-like
OE6A047415	688	715	806	827	OE6A047415T1	Photoperception/Photosynthesis	cryptochrome-1
OE6A050501	135	157	249	274	OE6A050501T1	Photoperception/Photosynthesis	photosystem I chlorophyll a b-binding 6, chloroplastic
OE6A051654	6	33	100	130	OE6A051654T1	Photoperception/Photosynthesis	photosystem II reaction center PSB28
OE6A052015	518	542	626	655	OE6A052015T2	Photoperception/Photosynthesis	REVEILLE 8
OE6A054299	226	246	325	350	OE6A054299T1	Photoperception/Photosynthesis	LOV domain-containing
OE6A054446	2289	2311	2404	2427	OE6A054446T1	Photoperception/Photosynthesis	zinc finger CONSTANS-LIKE 16-like
OE6A059768	6	36	121	145	OE6A059768T1	Photoperception/Photosynthesis	transcription factor PIF7-like
OE6A060484	441	468	552	580	OE6A060484T2	Photoperception/Photosynthesis	EARLY FLOWERING 4-like
OE6A061247	282	302	398	421	OE6A061247T1	Photoperception/Photosynthesis	glycine-rich RNA-binding -like
OE6A065025	555	578	670	694	OE6A065025T2	Photoperception/Photosynthesis	ultraviolet-B receptor UVR8
OE6A065557	198	220	312	334	OE6A065557T1	Photoperception/Photosynthesis	RNA polymerase sigma factor sigE, chloroplastic mitochondrial
OE6A065903	37	60	148	170	OE6A065903T1	Photoperception/Photosynthesis	light-harvesting complex 3 isotype 1
OE6A066649	430	451	548	568	OE6A066649T1	Photoperception/Photosynthesis	chlorophyll a-b binding CP26, chloroplastic
OE6A066816	387	410	505	525	OE6A066816T1	Photoperception/Photosynthesis	LEAFY
OE6A067968	374	392	472	499	OE6A067968T1	Photoperception/Photosynthesis	LOV domain-containing
OE6A070141	101	131	203	227	OE6A070141T1	Photoperception/Photosynthesis	LOV domain-containing
OE6A071019	51	74	160	190	OE6A071019T1	Photoperception/Photosynthesis	photosystem I reaction center subunit IV A
OE6A072071	303	325	423	442	OE6A072071T2	Photoperception/Photosynthesis	phytochrome-associated serine threonine- phosphatase
OE6A073013	749	771	860	888	OE6A073013T1	Photoperception/Photosynthesis	photosystem II 22 kDa , chloroplastic
OE6A073435	777	802	896	916	OE6A073435T1	Photoperception/Photosynthesis	LOV domain-containing
OE6A073944	513	531	630	651	OE6A073944T2	Photoperception/Photosynthesis	LOV domain-containing
OE6A074596	349	373	468	488	OE6A074596T1	Photoperception/Photosynthesis	phytochrome A
OE6A076354	594	616	715	733	OE6A076354T1	Photoperception/Photosynthesis	photosystem I assembly factor PSA3, chloroplastic
OE6A077695	727	753	848	865	OE6A077695T1	Photoperception/Photosynthesis	two-component response regulator-like APRR1
OE6A078915	615	640	734	753	OE6A078915T1	Photoperception/Photosynthesis	transcription factor PIF4
OE6A080272	55	77	171	194	OE6A080272T1	Photoperception/Photosynthesis	chlorophyll a-b binding 8, chloroplastic
OE6A080404	102	127	211	241	OE6A080404T1	Photoperception/Photosynthesis	two-component response regulator-like APRR7 isoform X1
OE6A082516	681	710	792	820	OE6A082516T1	Photoperception/Photosynthesis	zinc finger CONSTANS-LIKE 2-like
OE6A083634	1	19	108	125	OE6A083634T1	Photoperception/Photosynthesis	zinc finger CONSTANS-LIKE 14-like
OE6A083912	1287	1313	1396	1426	OE6A083912T2	Photoperception/Photosynthesis	SPA1-RELATED 4-like isoform X1
OE6A084581	1900	1924	2019	2039	OE6A084581T4	Photoperception/Photosynthesis	kelch domain-containing 2-like
OE6A085573	751	779	865	887	OE6A085573T1	Photoperception/Photosynthesis	zinc finger CONSTANS-LIKE 4-like
OE6A086099	720	750	838	859	OE6A086099T1	Photoperception/Photosynthesis	LOV domain-containing
OE6A086721	366	389	483	505	OE6A086721T3	Photoperception/Photosynthesis	transcription factor HY5
OE6A086737	190	214	302	329	OE6A086737T1	Photoperception/Photosynthesis	XAP5 circadian timekeeper
OE6A086983	266	292	372	402	OE6A086983T1	Photoperception/Photosynthesis	photosystem II 10 kDa polypeptide, chloroplastic
OE6A087741	1	24	98	128	OE6A087741T1	Photoperception/Photosynthesis	chlorophyll a-b binding 21, chloroplastic-like
OE6A088445	339	359	453	478	OE6A088445T1	Photoperception/Photosynthesis	photosystem I chlorophyll a b-binding 5
OE6A088469	574	598	686	713	OE6A088469T2	Photoperception/Photosynthesis	transcription factor PIF3-like isoform X1
OE6A088872	450	484	563	589	OE6A088872T1	Photoperception/Photosynthesis	Phytochrome A
OE6A089246	395	417	513	534	OE6A089246T2	Photoperception/Photosynthesis	transcription factor PIF1-like
OE6A092207	12	34	119	149	OE6A092207T1	Photoperception/Photosynthesis	chlorophyll a-b binding 13
OE6A092384	649	667	765	788	OE6A092384T1	Photoperception/Photosynthesis	chlorophyll a-b binding , chloroplastic
OE6A094248	11	39	119	145	OE6A094248T1	Photoperception/Photosynthesis	photosystem II D2
OE6A099213	625	645	745	764	OE6A099213T1	Photoperception/Photosynthesis	flowering time control FCA isoform X3
OE6A100286	152	174	254	278	OE6A100286T1	Photoperception/Photosynthesis	phytochrome-interacting ankyrin-repeat 2-like
OE6A100672	3	25	112	136	OE6A100672T1	Photoperception/Photosynthesis	chloroplast light-harvesting chlorophyll a b-binding
OE6A102958	244	263	360	383	OE6A102958T2	Photoperception/Photosynthesis	GIGANTEA-like isoform X1
OE6A103537	250	276	362	387	OE6A103537T1	Photoperception/Photosynthesis	flowering locus T
OE6A105055	147	173	237	272	OE6A105055T2	Photoperception/Photosynthesis	LOV domain-containing
OE6A106143	65	87	177	203	OE6A106143T1	Photoperception/Photosynthesis	chlorophyll a-b binding 151, chloroplastic
OE6A106820	776	801	887	915	OE6A106820T1	Photoperception/Photosynthesis	zinc finger CONSTANS-LIKE 6
OE6A109185	202	225	316	340	OE6A109185T1	Photoperception/Photosynthesis	RNA polymerase sigma factor sigC
OE6A110681	683	711	803	822	OE6A110681T1	Photoperception/Photosynthesis	two-component response regulator-like APRR5 isoform X2
OE6A111564	47	74	154	182	OE6A111564T1	Photoperception/Photosynthesis	COP1
OE6A112726	186	216	302	325	OE6A112726T1	Photoperception/Photosynthesis	transcription factor LAF1-like;
OE6A113194	128	159	236	263	OE6A113194T1	Photoperception/Photosynthesis	flowering locus K homology domain
OE6A114109	495	517	607	632	OE6A114109T1	Photoperception/Photosynthesis	chlorophyll a-b binding CP24 10A, chloroplastic
OE6A114272	780	812	894	919	OE6A114272T1	Photoperception/Photosynthesis	cryptochrome-1 isoform X1
OE6A114288	885	911	996	1018	OE6A114288T1	Photoperception/Photosynthesis	chlorophyll a-b binding 6
OE6A114644	1961	1987	2076	2100	OE6A114644T1	Photoperception/Photosynthesis	phytochrome A
OE6A118632	4	32	115	143	OE6A118632T1	Photoperception/Photosynthesis	LOV domain-containing
OE6A119241	409	436	516	544	OE6A119241T2	Photoperception/Photosynthesis	REVEILLE 6 isoform X1;

## Sheet: Table S2
Table S2. Summary of reads filtering and alignment processes. Analysis performed on fruit samples collected during 2019 olive oil season.
Sample	Raw Reads	HQ Filtered Reads	HQ Filtered Reads %	edgeR quasi-likelihood
				Mapped Reads	Mapped Reads %
Cellina_Ripe_I	1246090	1143876	91.8	1138660	99.5
Cellina_Ripe_II	1097887	1025460	93.4	1021674	99.6
Cellina_Ripe_III	1299654	1206931	92.87	1202505	99.6
Cellina_Turning_I	1245110	1162403	93.36	1157878	99.6
Cellina_Turning_II	1348526	1250905	92.76	1244673	99.5
Cellina_Turning_III	1192764	1113744	93.38	1109671	99.6
Ruveia_Ripe_I	1666258	1539904	92.42	1533110	99.6
Ruveia_Ripe_II	1297347	1204284	92.83	1197589	99.4
Ruveia_Ripe_III	1216883	1127553	92.66	1121853	99.5
Ruveia_Turning_I	962855	893355	92.78	889514	99.6
Ruveia_Turning_II	988903	923244	93.36	918844	99.5
Ruveia_Turning_III	1252319	1166916	93.18	1161717	99.6
Salella_Ripe_I	1533642	1433250	93.45	1425889	99.5
Salella_Ripe_II	1135837	1063633	93.64	1058772	99.5
Salella_Ripe_III	1784380	1657806	92.91	1650348	99.6
Salella_Turning_I	1322511	1232575	93.2	1226781	99.5
Salella_Turning_II	1419944	1330948	93.73	1324938	99.5
Salella_Turning_III	966135	897990	92.95	894402	99.6
Total	22977045	21374777	93.03	21278818	99.55

## Sheet: Table S3
Table S3. Summary of key DEGs during fruit ripening in each genotype grouped according to the principal functions included in the gene panel and to Venn groups (Fig. 2A). FC: Fold change; FDR: adjusted p-value.
VENN Groups	Function/Panel	Gene_ID	Annotation	Gene Ontology terms	Cellina di Nardò			Ruveia			Salella
					Turning vs. Ripe			Turning vs. Ripe			Turning vs. Ripe
					FC	PValue	FDR	FC	PValue	FDR	FC	PValue	FDR
Group I	Photoperception/Photosynthesis	OE6A073013	photosystem II 22 kDa , chloroplastic	chloroplast thylakoid membrane (GO:0009535); photosynthesis (GO:0015979); chlorophyll binding (GO:0016168); xanthophyll binding (GO:0051738); nucleus (GO:0005634)	28.73	9.12e-14	9.3e-12	5.2	5.23e-10	1.33e-08	263.22	5.03e-15	2.05e-13
		OE6A106143	chlorophyll a-b binding 151, chloroplastic	response to light stimulus (GO:0009416); chlorophyll binding (GO:0016168); plastid (GO:0009536); photosynthesis (GO:0015979); integral component of membrane (GO:0016021)	6.94	1.92e-13	1.3e-11	2.14	2.45e-07	3.57e-06	9.48	1.44e-14	4.9e-13
		OE6A114109	chlorophyll a-b binding CP24 10A, chloroplastic	response to light stimulus (GO:0009416); membrane (GO:0016020); photosynthesis, light harvesting (GO:0009765); chlorophyll binding (GO:0016168); plastid (GO:0009536); photosynthesis (GO:0015979)	5.39	1.24e-11	4.21e-10	2.32	7.62e-08	1.42e-06	128.93	5.79e-17	5.91e-15
		OE6A007397	LOV domain-containing	photoreceptor activity (GO:0009881); response to stimulus (GO:0050896); phosphorylation (GO:0016310); blue light signaling pathway (GO:0009785)	3.28	1.77e-10	4.51e-09	2.07	1.58e-06	1.79e-05	2.2	5.91e-08	6.59e-07
		OE6A110681	two-component response regulator-like APRR5 isoform X2	cytokinin-activated signaling pathway (GO:0009736); phosphorelay signal transduction system (GO:0000160); rhythmic process (GO:0048511); nucleus (GO:0005634)	2.92	2.88e-09	4.89e-08	3.5	2.48e-10	7.23e-09	4.21	2.79e-11	4.75e-10
		OE6A012335	RNA polymerase sigma factor sigB	chloroplast (GO:0009507); cellular response to light stimulus (GO:0071482); esponse to red light (GO:0010114); regulation of DNA-templated transcription, initiation (GO:2000142)	2.2	0.000187	0.000658	2.27	7.24e-05	0.000422	2.53	6.21e-05	0.000281
	Phenylpropanoids	OE6A081156	flavone synthase II	monooxygenase activity (GO:0004497); oxidoreductase activity (GO:0016491); membrane (GO:0016020); integral component of membrane (GO:0016021); sesquiterpene biosynthetic process (GO:0051762)	3.03	1.32e-10	3.84e-09	4.71	3.29e-13	3.36e-11	2.27	2.62e-08	3.57e-07
		OE6A106272	trans-resveratrol di-O-methyltransferase-like	O-methyltransferase activity (GO:0008171); protein dimerization activity (GO:0046983); S-adenosylmethionine-dependent methyltransferase activity (GO:0008757); methylation (GO:0032259)	-2.22	0.1	0.167	-8.82	1.44e-05	0.000113	-4.61	0.00199	0.00472
		OE6A081102	leucoanthocyanidin dioxygenase	dioxygenase activity (GO:0051213); L-ascorbic acid binding (GO:0031418); leucocyanidin oxygenase activity (GO:0050589); anthocyanin-containing compound biosynthetic process (GO:0009718); proanthocyanidin biosynthetic process (GO:0010023)	-2.4	9.14e-07	6.91e-06	-4.19	1.15e-06	1.46e-05	-2.38	8.38e-05	0.000349
		OE6A048749	leucoanthocyanidin dioxygenase	dioxygenase activity (GO:0051213); L-ascorbic acid binding (GO:0031418); leucocyanidin oxygenase activity (GO:0050589); anthocyanin-containing compound biosynthetic process (GO:0009718); proanthocyanidin biosynthetic process (GO:0010023)	-2.86	1.26e-05	6.74e-05	-2.97	2.13e-05	0.000146	-2.78	2.4e-05	0.000125
		OE6A065332	trans-resveratrol di-O-methyltransferase-like	O-methyltransferase activity (GO:0008171); protein dimerization activity (GO:0046983); S-adenosylmethionine-dependent methyltransferase activity (GO:0008757); methylation (GO:0032259)	-3.45	0.00482	0.0113	-6.63	5.23e-06	4.64e-05	-5.29	0.000163	0.000626
		OE6A048764	phenylalanine ammonia-lyase	ammonia-lyase activity (GO:0016841); cytoplasm (GO:0005737); L-phenylalanine catabolic process (GO:0006559); phenylpropanoid metabolic process (GO:0009698); protein arginylation (GO:0016598); response to gibberellin (GO:0009739); phenylpropanoid biosynthetic process (GO:0009699)	-6.14	6.68e-07	5.68e-06	-2.06	0.00515	0.0191	-5.11	3.56e-06	2.45e-05
	Fatty Acids	OE6A013923	3-ketoacyl- synthase 15-like	transferase activity, transferring acyl groups other than amino-acyl groups (GO:0016747); fatty acid biosynthetic process (GO:0006633); integral component of membrane (GO:0016021); very-long-chain 3-ketoacyl-CoA synthase activity (GO:0102756)	3.46	0.338	0.467	-4.09	0.000221	0.00119	6.34	0.0102	0.0193
Group II	Photoperception/Photosynthesis	OE6A004297	photosystem I assembly factor PSA3, chloroplastic	stromal side of plastid thylakoid membrane (GO:0098572)	10.59	0.000384	0.00126				7.22	0.000474	0.0014
		OE6A028974	photosystem I reaction center subunit psaK, chloroplastic	membrane (GO:0016020); photosystem I (GO:0009522); photosynthesis (GO:0015979); plastid (GO:0009536); integral component of membrane (GO:0016021); chloroplast thylakoid membrane (GO:0009535); nucleus (GO:0005634)	8.8	6.59e-10	1.34e-08				19.33	9.62e-08	9.35e-07
		OE6A092384	chlorophyll a-b binding , chloroplastic	membrane (GO:0016020); photosynthesis, light harvesting (GO:0009765); chlorophyll binding (GO:0016168); plastid (GO:0009536); photosynthesis (GO:0015979); integral component of membrane (GO:0016021)	8.36	4.22e-14	8.62e-12				18.54	3.62e-15	1.85e-13
		OE6A024133	photosystem I reaction center subunit N, chloroplastic isoform X2	chloroplast photosystem I (GO:0030093); photosynthesis (GO:0015979); membrane (GO:0016020); plastid (GO:0009536); chloroplast thylakoid membrane (GO:0009535)	7.7	5.22e-13	2.66e-11				21.84	1.16e-15	7.9e-14
		OE6A080272	chlorophyll a-b binding 8, chloroplastic	chloroplast thylakoid membrane (GO:0009535); response to light stimulus (GO:0009416); photosynthesis, light harvesting in photosystem I (GO:0009768); chlorophyll binding (GO:0016168); plastid (GO:0009536); photosystem II (GO:0009523)	6.52	4.71e-09	7.05e-08				5.78	0.000498	0.00145
		OE6A083912	SPA1-RELATED 4-like isoform X1	response to blue light (GO:0009637); photomorphogenesis (GO:0009640); protein phosphorylation (GO:0006468); red, far-red light phototransduction (GO:0009585)	6.27	2.9e-10	6.56e-09				6.06	8.94e-12	1.66e-10
		OE6A018659	photosystem II reaction center W , chloroplastic-like	photosystem II stabilization (GO:0042549); photosynthesis (GO:0015979); plastid (GO:0009536); integral component of membrane (GO:0016021); chloroplast thylakoid membrane (GO:0009535)	5.06	5.11e-07	4.59e-06				5.44	3.27e-11	5.13e-10
		OE6A001158	photosystem I assembly factor PSA3, chloroplastic	stromal side of plastid thylakoid membrane (GO:0098572)	4.71	0.00708	0.016				5.18	0.000373	0.00113
		OE6A076354	photosystem I assembly factor PSA3, chloroplastic	stromal side of plastid thylakoid membrane (GO:0098572)	3.49	0.122	0.196				5.58	6.48e-05	0.000288
		OE6A058558	two-component response regulator-like APRR5	cytokinin-activated signaling pathway (GO:0009736); phosphorelay signal transduction system (GO:0000160); rhythmic process (GO:0048511); nucleus (GO:0005634);	2.48	0.274	0.388				5.57	0.0179	0.033
		OE6A015647	photosystem I reaction center subunit III, chloroplastic-like	photosystem I reaction center (GO:0009538); photosynthesis (GO:0015979); plastid (GO:0009536); integral component of membrane (GO:0016021); nucleus (GO:0005634)	2.01	2.76e-07	3.02e-06				45.95	3.25e-17	5.91e-15
		OE6A102958	GIGANTEA-like isoform X1	regulation of circadian rhythm (GO:0042752); positive regulation of long-day photoperiodism, flowering (GO:0048578); response to cold (GO:0009409); response to blue light (GO:0009637); nucleoplasm (GO:0005654); response to far red light (GO:0010218); temperature compensation of the circadian clock (GO:0010378)	-2.21	1.43e-07	1.83e-06				-2.51	1.66e-08	2.42e-07
		OE6A073435	LOV domain-containing	photoreceptor activity (GO:0009881); response to stimulus (GO:0050896); phosphorylation (GO:0016310); blue light signaling pathway (GO:0009785);	-2.31	0.293	0.409				2.04	3.54e-08	4.25e-07
		OE6A113194	flowering locus K homology domain	cytoplasm (GO:0005737); nucleus (GO:0005634); regulation of gene expression (GO:0010468); positive regulation of flower development (GO:0009911)	-3.3	0.00195	0.00497				-2.57	0.00939	0.0181
	Phenylpropanoids	OE6A074408	UDP-glucose flavonoid 3-O-glucosyltransferase 3	daphnetin 3-O-glucosyltransferase activity (GO:0102360); flavonol 3-O-glucosyltransferase activity (GO:0047893); myricetin 3-O-glucosyltransferase activity (GO:0102425); ubiquinone biosynthetic process (GO:0006744)	2.46	5.18e-07	4.59e-06				2.01	0.00062	0.00173
	Fatty Acids	OE6A063529	very-long-chain enoyl- reductase-like	very long-chain fatty acid biosynthetic process (GO:0042761); integral component of membrane (GO:0016021); fatty acid metabolic process (GO:0006631); fatty acid biosynthetic process (GO:0006633); fatty acid elongase activity (GO:0009922); cytosol (GO:0005829); sphingolipid metabolic process (GO:0006665)	-3.12	8.9e-13	3.63e-11				-3.45	1.2e-13	3.51e-12
		OE6A056459	Malonyl- :ACP transacylase	mitochondrion (GO:0005739); fatty acid metabolic process (GO:0006631); S-malonyltransferase activity (GO:0016419); fatty acid beta-oxidation (GO:0006635); fatty acid synthase activity (GO:0004312); monocarboxylic acid metabolic process (GO:0032787)	-3.56	0.00152	0.00412				-2.78	8.23e-05	0.000349
		OE6A068286	phospholipid:diacylglycerol acyltransferase 2	O-acyltransferase activity (GO:0008374); lipid metabolic process (GO:0006629)	-5.92	0.0019	0.00492				-3.99	0.00128	0.00322
Group III	Photoperception/Photosynthesis	OE6A043940	zinc finger CONSTANS-LIKE 6	nucleus (GO:0005634); zinc ion binding (GO:0008270); transcription regulatory region sequence-specific DNA binding (GO:0000976); DNA-binding transcription factor activity (GO:0003700)	8.57	7.4e-08	1.01e-06	-2.76	0.00103	0.00468
		OE6A106820	zinc finger CONSTANS-LIKE 6	nucleus (GO:0005634); zinc ion binding (GO:0008270); transcription regulatory region sequence-specific DNA binding (GO:0000976); DNA-binding transcription factor activity (GO:0003700)	6.99	2.81e-07	3.02e-06	-2.72	0.00115	0.00508
		OE6A089246	transcription factor PIF1-like	nucleus (GO:0005634); phytochrome binding (GO:0010313); red light signaling pathway (GO:0010161); chlorophyll biosynthetic process (GO:0015995); gibberellin biosynthetic process (GO:0009686); gibberellic acid mediated signaling pathway (GO:0009740); negative regulation of photomorphogenesis (GO:0010100)	-5.16	0.0236	0.0491	-16.87	0.0089	0.0308
	Phenylpropanoids	OE6A040780	flavonol synthase	response to light stimulus (GO:0009416); L-ascorbic acid binding (GO:0031418); flavonoid biosynthetic process (GO:0009813); cytoplasm (GO:0005737); nucleus (GO:0005634); response to auxin (GO:0009733); flavonol biosynthetic process (GO:0051555)	27.87	2.42e-05	0.000124	5.4	0.000524	0.00255
		OE6A068581	flavonoid 3’,5’ -hydroxylase	flavonoid 3',5'-hydroxylase activity (GO:0033772); iron ion binding (GO:0005506); anthocyanin-containing compound biosynthetic process (GO:0009718)	3.29	4.09e-05	0.000178	7.55	0.000243	0.00127
		OE6A104547	dihydroflavonol 4-reductase	anthocyanin-containing compound biosynthetic process (GO:0009718); dihydrokaempferol 4-reductase activity (GO:0045552); flavonoid biosynthetic process (GO:0009813); flavanone 4-reductase activity (GO:0047890); extrinsic component of endoplasmic reticulum membrane (GO:0042406)	-2.03	0.0168	0.036	-2.99	0.000954	0.00442
		OE6A005638	naringenin,2-oxoglutarate 3-dioxygenase	L-ascorbic acid binding (GO:0031418); anthocyanin-containing compound biosynthetic process (GO:0009718); proanthocyanidin biosynthetic process (GO:0010023); response to jasmonic acid (GO:0009753); response to wounding (GO:0009611); vacuole organization (GO:0007033)	-2.4	3.34e-07	3.41e-06	-2.52	1.54e-07	2.61e-06
Group IV	Photoperception/Photosynthesis	OE6A086721	transcription factor HY5	red or far-red light signaling pathway (GO:0010017); regulation of photomorphogenesis (GO:0010099); regulation of abscisic acid-activated signaling pathway (GO:0009787); positive regulation of circadian rhythm (GO:0042753); gibberellic acid mediated signaling pathway (GO:0009740); positive regulation of flavonoid biosynthetic process (GO:0009963); positive regulation of anthocyanin metabolic proc…				2.7	5.33e-11	2.18e-09	3.56	1.19e-12	2.42e-11
		OE6A082516	zinc finger CONSTANS-LIKE 2-like	nucleus (GO:0005634); regulation of flower development (GO:0009909); chloroplast organization (GO:0009658); regulation of transcription, DNA-templated (GO:0006355)				6.9	1.26e-11	8.58e-10	2.16	6.42e-06	4.09e-05
		OE6A052015	REVEILLE 8	positive regulation of circadian rhythm (GO:0042753); photoperiodism, flowering (GO:0048573); positive regulation of gene expression (GO:0010628); circadian regulation of gene expression (GO:0032922)				4.77	1.71e-13	3.36e-11	2.01	6.14e-08	6.59e-07
	Phenylpropanoids	OE6A108606	trans-cinnamate 4-monooxygenase	trans-cinnamate 4-monooxygenase activity (GO:0016710); lignin metabolic process (GO:0009808); integral component of membrane (GO:0016021); phenylpropanoid metabolic process (GO:0009698); developmental process (GO:0032502); ubiquinone biosynthetic process (GO:0006744)				-2.56	0.000163	0.000901	-3.12	7.44e-06	4.41e-05
	Fatty Acids	OE6A060413	very-long-chain enoyl- reductase-like	very long-chain fatty acid biosynthetic process (GO:0042761); integral component of membrane (GO:0016021); fatty acid metabolic process (GO:0006631); very-long-chain enoyl-CoA reductase activity (GO:0102758); fatty acid elongase activity (GO:0009922); cytosol (GO:0005829); sphingolipid metabolic process (GO:0006665)				16.51	2.83e-11	1.44e-09	5.02	1.26e-07	1.17e-06
Group V	Photoperception/Photosynthesis	OE6A118632	LOV domain-containing	photoreceptor activity (GO:0009881); transferase activity (GO:0016740); response to stimulus (GO:0050896); phosphorylation (GO:0016310); blue light signaling pathway (GO:0009785);	2.24	0.0895	0.153
		OE6A109185	RNA polymerase sigma factor sigC	chloroplast (GO:0009507); cellular response to light stimulus (GO:0071482); transcription regulatory region sequence-specific DNA binding (GO:0000976); regulation of DNA-templated transcription, initiation (GO:2000142)	5.9	0.176	0.27
		OE6A103537	flowering locus T	endoplasmic reticulum (GO:0005783); cytoplasm (GO:0005737); nucleus (GO:0005634); photoperiodism, flowering (GO:0048573); meristem determinacy (GO:0010022); positive regulation of flower development (GO:0009911); phosphatidylethanolamine binding (GO:0008429)	5.83	0.105	0.174
		OE6A050501	photosystem I chlorophyll a b-binding 6, chloroplastic	response to light stimulus (GO:0009416); photosynthesis, light harvesting in photosystem I (GO:0009768); membrane (GO:0016020); chlorophyll binding (GO:0016168); plastid (GO:0009536); chloroplast thylakoid membrane (GO:0009535)	2.39	4.84e-09	7.05e-08
		OE6A035887	zinc finger CONSTANS-LIKE 1-like isoform X2	regulation of flower development (GO:0009909); DNA-binding transcription factor activity (GO:0003700); regulation of transcription, DNA-templated (GO:0006355)	-2.29	0.000103	0.000397
	Phenylpropanoids	OE6A117416	cinnamoyl- reductase-like SNL6 isoform X2	3-beta-hydroxy-delta5-steroid dehydrogenase activity (GO:0003854); steroid biosynthetic process (GO:0006694)	-41.17	0.000494	0.00157
		OE6A095147	phenylalanine ammonia-lyase	ammonia-lyase activity (GO:0016841); cytoplasm (GO:0005737); L-phenylalanine catabolic process (GO:0006559); phenylpropanoid metabolic process (GO:0009698); response to gibberellin (GO:0009739); phenylpropanoid biosynthetic process (GO:0009699)	-3.02	9.62e-05	0.000393
		OE6A066812	chalcone isomerase	intramolecular lyase activity (GO:0016872); flavonoid biosynthetic process (GO:0009813); nucleus (GO:0005634); extrinsic component of endoplasmic reticulum membrane (GO:0042406); response to auxin (GO:0009733); chloroplast (GO:0009507); response to UV (GO:0009411)	-2.37	9.85e-10	1.83e-08
		OE6A063869	diihydroflavonol 4-reductase	anthocyanin-containing compound biosynthetic process (GO:0009718); flavonoid biosynthetic process (GO:0009813); flavanone 4-reductase activity (GO:0047890); extrinsic component of endoplasmic reticulum membrane (GO:0042406)	-3.9	0.013	0.0284
		OE6A053999	UDP-glucose flavonoid 3-O-glucosyltransferase 6-like	UDP-glycosyltransferase activity (GO:0008194)	3.22	8.29e-06	4.74e-05
		OE6A049944	phenylalanine ammonia-lyase	ammonia-lyase activity (GO:0016841); cytoplasm (GO:0005737); L-phenylalanine catabolic process (GO:0006559); phenylpropanoid metabolic process (GO:0009698); response to gibberellin (GO:0009739); phenylpropanoid biosynthetic process (GO:0009699)	-2.84	0.000878	0.00256
	Fatty Acids	OE6A057230	probable glycerol-3-phosphate acyltransferase 3	phosphatase activity (GO:0016791); membrane (GO:0016020); glycerol-3-phosphate 2-O-acyltransferase activity (GO:0090447); integral component of membrane (GO:0016021); phospholipid biosynthetic process (GO:0008654); lipid metabolic process (GO:0006629); glycerol-3-phosphate O-acyltransferase activity (GO:0004366)	5.41	3.42e-05	0.000155
		OE6A002165	stearoyl-[acyl-carrier- ] 9-desaturase 6, chloroplastic	fatty acid metabolic process (GO:0006631); acyl-[acyl-carrier-protein] desaturase activity (GO:0045300); fatty acid biosynthetic process (GO:0006633); plastid (GO:0009536); chloroplast (GO:0009507); stearoyl-[acp] desaturase activity (GO:0102786)	-4.54	2.51e-05	0.000125
		OE6A001246	phospholipid:diacylglycerol acyltransferase 2	O-acyltransferase activity (GO:0008374); lipid metabolic process (GO:0006629)	-4.52	0.00011	0.000408
Group VI	Photoperception/Photosynthesis	OE6A054446	zinc finger CONSTANS-LIKE 16-like	nucleus (GO:0005634); zinc ion binding (GO:0008270); DNA-binding transcription factor activity (GO:0003700); protein binding (GO:0005515)				4.13	1.59e-10	5.41e-09
		OE6A060484	EARLY FLOWERING 4-like	nucleus (GO:0005634); entrainment of circadian clock (GO:0009649); positive regulation of circadian rhythm (GO:0042753); red, far-red light phototransduction (GO:0009585); flower development (GO:0009908); photoperiodism, flowering (GO:0048573)				2.83	1.23e-05	0.0001
		OE6A065557	RNA polymerase sigma factor sigE, chloroplastic mitochondrial	cellular response to blue light (GO:0071483); plastid (GO:0009536); response to red light (GO:0010114); response to far red light (GO:0010218); chloroplast organization (GO:0009658); cellular response to salt stress (GO:0071472)				2.05	4.92e-08	1.11e-06
	Phenylpropanoids	OE6A089986	probable cinnamyl alcohol dehydrogenase	lignin biosynthetic process (GO:0009809); sinapyl alcohol dehydrogenase activity (GO:0052747); cytosol (GO:0005829); phenylpropanoid biosynthetic process (GO:0009699)				2.71	3.26e-06	3.09e-05
		OE6A011825	leucoanthocyanidin reductase	leucoanthocyanidin reductase activity (GO:0033788); proanthocyanidin biosynthetic process (GO:0010023)				2.19	0.0142	0.0468
	Fatty Acids	OE6A012604	3-ketoacyl- synthase 20-like	fatty acid biosynthetic process (GO:0006633); integral component of membrane (GO:0016021); very-long-chain 3-ketoacyl-CoA synthase activity (GO:0102756); fatty acid elongase activity (GO:0009922); response to cold (GO:0009409); response to light stimulus (GO:0009416)				-2.04	2.91e-06	2.96e-05
Group VII	Photoperception/Photosynthesis	OE6A066649	chlorophyll a-b binding CP26, chloroplastic	chloroplast thylakoid membrane (GO:0009535); response to light stimulus (GO:0009416); photosynthesis, light harvesting in photosystem I (GO:0009768); chlorophyll binding (GO:0016168); cytosol (GO:0005829)							10.51	4.61e-13	1.18e-11
		OE6A091010	FAR1-RELATED SEQUENCE 5-like	zinc ion binding (GO:0008270); regulation of transcription, DNA-templated (GO:0006355); nucleus (GO:0005634); protein binding (GO:0005515)							-2.94	5.95e-05	0.000276
		OE6A114181	zinc finger CONSTANS-LIKE 10-like isoform X1	zinc ion binding (GO:0008270); nucleus (GO:0005634); DNA-binding transcription factor activity (GO:0003700); protein binding (GO:0005515); regulation of transcription, DNA-templated (GO:0006355)							-5.03	4.09e-05	0.000194
		OE6A010456	transcription factor PIL1-like	shade avoidance (GO:0009641); red or far-red light signaling pathway (GO:0010017); regulation of transcription, DNA-templated (GO:0006355)							-5.35	7.27e-08	7.42e-07
	Phenylpropanoids	OE6A074153	cinnamoyl- reductase 1-like	circadian rhythm (GO:0007623); cytoplasm (GO:0005737); lignin biosynthetic process (GO:0009809); green leaf volatile biosynthetic process (GO:0010597); phenylpropanoid metabolic process (GO:0009698)							2.1	0.000676	0.00186
	Fatty Acids	OE6A090531	3-ketoacyl- synthase 20-like	fatty acid biosynthetic process (GO:0006633); integral component of membrane (GO:0016021); very-long-chain 3-ketoacyl-CoA synthase activity (GO:0102756); fatty acid elongase activity (GO:0009922); response to cold (GO:0009409); response to light stimulus (GO:0009416)							3.63	3.83e-05	0.000186
		OE6A044469	3-ketoacyl- synthase 6	fatty acid biosynthetic process (GO:0006633); integral component of membrane (GO:0016021); endoplasmic reticulum (GO:0005783); very-long-chain 3-ketoacyl-CoA synthase activity (GO:0102756); response to cold (GO:0009409); response to light stimulus (GO:0009416); mitochondrion (GO:0005739)							3.44	1.01e-12	2.28e-11
		OE6A077716	very-long-chain enoyl- reductase-like	very long-chain fatty acid biosynthetic process (GO:0042761); integral component of membrane (GO:0016021); fatty acid metabolic process (GO:0006631); very-long-chain enoyl-CoA reductase activity (GO:0102758); endoplasmic reticulum membrane (GO:0005789); fatty acid elongase activity (GO:0009922); sphingolipid metabolic process (GO:0006665)							2.59	9.85e-07	8.37e-06
		OE6A048706	3-ketoacyl- synthase 4	transferase activity, transferring acyl groups other than amino-acyl groups (GO:0016747); membrane (GO:0016020); fatty acid biosynthetic process (GO:0006633); integral component of membrane (GO:0016021); very-long-chain 3-ketoacyl-CoA synthase activity (GO:0102756)							2.23	1.51e-05	8.33e-05
		OE6A112905	biotin carboxyl carrier of acetyl- carboxylase, chloroplastic-like	acetyl-CoA carboxylase activity (GO:0003989); fatty acid biosynthetic process (GO:0006633); acetyl-CoA carboxylase complex (GO:0009317); plastid (GO:0009536); fatty acid metabolic process (GO:0006631)							-2.13	0.000187	0.000696
		OE6A057041	phosphatidylcholine:diacylglycerol cholinephosphotransferase 1-like	diacylglycerol cholinephosphotransferase activity (GO:0004142); integral component of membrane (GO:0016021); lipid metabolic process (GO:0006629); phosphatidylcholine metabolic process (GO:0046470); CDP-choline pathway (GO:0006657)							-2.2	1.26e-05	7.14e-05
		OE6A078092	phospholipid:diacylglycerol acyltransferase 1-like	lipid metabolic process (GO:0006629); transferase activity, transferring acyl groups (GO:0016746); membrane (GO:0016020); glycerol metabolic process (GO:0006071); phospholip (GO:0046027); triglyceride biosynthetic process (GO:0019432); plastid (GO:0009536)							-2.65	2.9e-07	2.58e-06

## Sheet: Table S4
Table S4. Summary of key DEGs in 'Cellina di Nardò' vs. 'Salella' comparison grouped according to the principal functions included in the gene panel and to Venn groups (Fig. 2B). FC: Fold change; FDR: adjusted p-value.
VENN Groups	Function/Panel	Gene_ID	Annotation	Gene Ontology terms	Turning			Ripe
					Cellina di Nardò vs. Salella			Cellina di Nardò vs. Salella
					FC	PValue	FDR	FC	PValue	FDR
Group I	Photoperception/Photosynthesis	OE6A047144	EARLY FLOWERING 3-like	regulation of photoperiodism, flowering (GO:2000028); nucleus (GO:0005634); response to cold (GO:0009409); response to auxin (GO:0009733); response to abscisic acid (GO:0009737); regulation of circadian rhythm (GO:0042752)	429.02	5.44e-13	6.53e-12	341	4.72e-13	6.02e-12
		OE6A071307	zinc finger CONSTANS-LIKE 4-like	nucleus (GO:0005634); regulation of flower development (GO:0009909); zinc ion binding (GO:0008270); metal ion binding (GO:0046872)	293.54	1.98e-13	2.69e-12	154.56	1.11e-13	1.62e-12
		OE6A012821	FAR-RED IMPAIRED RESPONSE 1-like	regulation of transcription, DNA-templated (GO:0006355); nucleus (GO:0005634); positive regulation of circadian rhythm (GO:0042753); negative regulation of leaf senescence (GO:1900056); response to red or far red light (GO:0009639);	158.13	1.38e-07	5.21e-07	24.29	2.9e-06	8.71e-06
		OE6A080272	chlorophyll a-b binding 8, chloroplastic	response to light stimulus (GO:0009416); photosynthesis, light harvesting in photosystem I (GO:0009768); membrane (GO:0016020); plastid (GO:0009536); photosystem II (GO:0009523);	74.24	1.66e-13	2.43e-12	65.77	5.55e-11	4.19e-10
		OE6A010456	transcription factor PIL1-like (PIF3)	nucleus (GO:0005634); regulation of photosynthesis, light reaction (GO:0042548); regulation of plant organ morphogenesis (GO:1905421); circadian rhythm (GO:0007623); gibberellic acid mediated signaling pathway (GO:0009740); positive regulation of anthocyanin metabolic process (GO:0031539)	49.5	8.8e-15	1.63e-13	8.2	1.35e-11	1.2e-10
		OE6A028974	photosystem I reaction center subunit psaK, chloroplastic	membrane (GO:0016020); photosystem I (GO:0009522); photosynthesis (GO:0015979); plastid (GO:0009536); integral component of membrane (GO:0016021); chloroplast thylakoid membrane (GO:0009535); nucleus (GO:0005634);	11.16	6.32e-11	5.86e-10	24.5	4.09e-08	1.77e-07
		OE6A035887	CONSTANS-LIKE 1	nucleus (GO:0005634); regulation of flower development (GO:0009909); zinc ion binding (GO:0008270); DNA-binding transcription factor activity (GO:0003700); identical protein binding (GO:0042802); regulation of transcription, DNA-templated (GO:0006355)	7.31	3.92e-08	1.82e-07	12.89	2.9e-10	1.97e-09
		OE6A117378	XAP5 CIRCADIAN TIMEKEEPER	nucleus (GO:0005634); regulation of circadian rhythm (GO:0042752); response to blue light (GO:0009637); ethylene-activated signaling pathway (GO:0009873); regulation of photomorphogenesis (GO:0010099); response to red light (GO:0010114)	6.44	4.29e-05	9.51e-05	25.4	5.03e-06	1.45e-05
		OE6A066649	chlorophyll a-b binding CP26 (LHCB5)	response to light stimulus (GO:0009416); photosynthesis, light harvesting in photosystem I (GO:0009768); membrane (GO:0016020); chlorophyll binding (GO:0016168); plastid (GO:0009536); cytosol (GO:0005829)	3.6	4.39e-10	3.2e-09	25.66	1.95e-15	5.68e-14
		OE6A092384	chlorophyll a-b binding , chloroplastic	membrane (GO:0016020); photosynthesis, light harvesting (GO:0009765); chlorophyll binding (GO:0016168); plastid (GO:0009536); photosystem I (GO:0009522); photosystem II (GO:0009523);	3.43	9.79e-11	7.65e-10	7.62	6.02e-12	5.84e-11
		OE6A082516	zinc finger CONSTANS-LIKE 2-like	nucleus (GO:0005634); regulation of flower development (GO:0009909); chloroplast organization (GO:0009658)	3.28	6.58e-09	3.73e-08	3.73	3.3e-09	1.72e-08
		OE6A114272	cryptochrome-1 isoform X1	nucleus (GO:0005634); circadian regulation of gene expression (GO:0032922); anthocyanin-containing compound metabolic process (GO:0046283); auxin transport (GO:0060918); photoprotection (GO:0010117); regulation of meristem growth (GO:0010075); cytosol (GO:0005829); photomorphogenesis (GO:0009640)	3.07	2.43e-11	2.61e-10	3.2	1.54e-11	1.26e-10
		OE6A015647	photosystem I reaction center subunit III (psaF)	photosystem I reaction center (GO:0009538); photosynthesis (GO:0015979); plastid (GO:0009536); chloroplast thylakoid membrane (GO:0009535); nucleus (GO:0005634); chloroplast envelope (GO:0009941)	2.79	7.79e-10	5.13e-09	63.71	8.27e-18	4.22e-16
		OE6A037270	RNA polymerase sigma factor sigF, chloroplastic isoform X2	seedling development (GO:0090351); sigma factor activity (GO:0016987); plastid (GO:0009536); chloroplast (GO:0009507); cellular response to blue light (GO:0071483); DNA-binding transcription factor activity (GO:0003700); regulation of DNA-templated transcription, initiation (GO:2000142)	2.09	4.23e-07	1.39e-06	2.06	6.13e-07	2.06e-06
		OE6A044285	FAR-RED ELONGATED HYPOCOTYL 3 isoform X1	protein binding (GO:0005515); regulation of transcription, DNA-templated (GO:0006355); red or far-red light signaling pathway (GO:0010017); nucleus (GO:0005634); positive regulation of circadian rhythm (GO:0042753); positive regulation of transcription by RNA polymerase II (GO:0045944)	2.07	2.04e-09	1.26e-08	2.11	1.36e-09	8.4e-09
		OE6A073435	LOV domain-containing	protein phosphorylation (GO:0006468); photoreceptor activity (GO:0009881); nucleotide binding (GO:0000166); response to stimulus (GO:0050896); phosphorylation (GO:0016310); blue light photoreceptor activity (GO:0009882)	-5931.27	2.43e-21	4.95e-19	-1257.93	8.1e-20	1.65e-17
		OE6A109185	RNA polymerase sigma factor sigC	chloroplast (GO:0009507); cellular response to light stimulus (GO:0071482); regulation of RNA biosynthetic process (GO:2001141); plastid (GO:0009536)	-1099.22	2.92e-15	6.63e-14	-3953.82	4.48e-14	7.62e-13
		OE6A024312	LHY-like isoform X1	nucleus (GO:0005634); long-day photoperiodism, flowering (GO:0048574); circadian rhythm (GO:0007623); response to cold (GO:0009409); regulation of transcription, DNA-templated (GO:0006355)	-830.83	1.26e-17	6.4e-16	-777.88	1.62e-16	5.49e-15
		OE6A092574	RNA polymerase sigma factor sigC	chloroplast (GO:0009507); cellular response to light stimulus (GO:0071482); plastid (GO:0009536); regulation of DNA-templated transcription, initiation (GO:2000142)	-422	1.36e-08	7.09e-08	-290.91	3.02e-07	1.12e-06
		OE6A018659	photosystem II reaction center W , chloroplastic-like	photosystem II stabilization (GO:0042549); photosynthesis (GO:0015979); plastid (GO:0009536); integral component of membrane (GO:0016021); chloroplast thylakoid membrane (GO:0009535)	-51.41	3.02e-16	8.98e-15	-47.78	2.54e-14	5.75e-13
		OE6A086983	photosystem II 10 kDa polypeptide, chloroplastic	photosystem II (GO:0009523); photosynthesis (GO:0015979); membrane (GO:0016020); chloroplast (GO:0009507); thylakoid (GO:0009579)	-30.57	2.49e-15	6.34e-14	-25.33	7.11e-15	1.81e-13
		OE6A054446	zinc finger CONSTANS-LIKE 16-like	nucleus (GO:0005634); zinc ion binding (GO:0008270); DNA-binding transcription factor activity (GO:0003700); protein binding (GO:0005515)	-12.85	8.53e-15	1.63e-13	-8.31	2.13e-13	2.9e-12
		OE6A060484	EARLY FLOWERING 4-like	nucleus (GO:0005634); positive regulation of circadian rhythm (GO:0042753); flower development (GO:0009908); photoperiodism, flowering (GO:0048573); negative regulation of transcription by RNA polymerase II (GO:0000122)	-4.08	2.65e-07	9.33e-07	-4.33	4.95e-07	1.71e-06
		OE6A083912	SPA1-RELATED 4-like isoform X1	response to blue light (GO:0009637); photomorphogenesis (GO:0009640); protein phosphorylation (GO:0006468); nucleotide binding (GO:0000166); transferase activity (GO:0016740); red, far-red light phototransduction (GO:0009585)	-3.24	4.37e-09	2.54e-08	-3.35	3.7e-07	1.32e-06
		OE6A007397	LOV domain-containing	protein kinase activity (GO:0004672); photoreceptor activity (GO:0009881); nucleotide binding (GO:0000166); phosphorylation (GO:0016310); blue light signaling pathway (GO:0009785);	-2.95	4.58e-10	3.22e-09	-4.4	4.8e-12	4.89e-11
	Phenylpropanoids	OE6A081102	anthocyanidin synthase/leucoanthocyanidin dioxygenase	L-ascorbic acid binding (GO:0031418); leucocyanidin oxygenase activity (GO:0050589); metal ion binding (GO:0046872); anthocyanin-containing compound biosynthetic process (GO:0009718)	1662.59	2.67e-19	2.58e-17	1673.7	1.78e-19	1.81e-17
		OE6A082229	dihydroflavonol 4-reductase	flavanone 4-reductase activity (GO:0047890); oxidoreductase activity, acting on the CH-OH group of donors, NAD or NADP as acceptor (GO:0016616); anthocyanin-containing compound biosynthetic process (GO:0009718)	146.38	3.8e-19	2.58e-17	102.99	2.02e-18	1.37e-16
		OE6A049944	phenylalanine ammonia-lyase	ammonia-lyase activity (GO:0016841); cytoplasm (GO:0005737); L-phenylalanine catabolic process (GO:0006559); phenylpropanoid metabolic process (GO:0009698); response to gibberellin (GO:0009739); phenylpropanoid biosynthetic process (GO:0009699)	88.29	7.22e-08	3.27e-07	85.13	2.43e-09	1.38e-08
		OE6A095147	phenylalanine ammonia-lyase	ammonia-lyase activity (GO:0016841); catalytic activity (GO:0003824); cytoplasm (GO:0005737); phenylpropanoid metabolic process (GO:0009698); response to gibberellin (GO:0009739); phenylpropanoid biosynthetic process (GO:0009699)	47.95	1.35e-08	7.09e-08	234.56	6.37e-11	4.64e-10
		OE6A074408	UDP-glucose flavonoid 3-O-glucosyltransferase 6-like	UDP-glycosyltransferase activity (GO:0008194)	12.14	2.27e-13	2.9e-12	9.92	9.64e-12	8.94e-11
		OE6A081156	flavone synthase II	iron ion binding (GO:0005506); monooxygenase activity (GO:0004497); oxidoreductase activity (GO:0016491); membrane (GO:0016020)	3.22	4.19e-11	4.07e-10	2.42	1.17e-08	5.67e-08
		OE6A048764	phenylalanine ammonia-lyase	cytoplasm (GO:0005737); phenylpropanoid metabolic process (GO:0009698); phenylalanine ammonia-lyase activity (GO:0045548); tyrosine ammonia-lyase activity (GO:0052883); response to gibberellin (GO:0009739)	2.31	0.0027	0.00445	2.77	0.000286	0.000703
		OE6A117416	cinnamoyl- reductase-like SNL6 isoform X2	3-beta-hydroxy-delta5-steroid dehydrogenase activity (GO:0003854); steroid biosynthetic process (GO:0006694)	-12359.7	1.53e-13	2.39e-12	-351.59	5.62e-13	6.74e-12
		OE6A108606	trans-cinnamate 4-monooxygenase	endoplasmic reticulum (GO:0005783); peroxisome (GO:0005777); plant-type cell wall (GO:0009505); plasma membrane (GO:0005886); phenylpropanoid metabolic process (GO:0009698); developmental process (GO:0032502)	-80.55	9.11e-11	7.58e-10	-245.95	3.91e-12	4.2e-11
		OE6A055813	flavonol synthase flavanone 3-hydroxylase-like	cytoplasm (GO:0005737); nucleus (GO:0005634); flavonol synthase activity (GO:0045431); L-ascorbic acid binding (GO:0031418); flavonoid biosynthetic process (GO:0009813); response to auxin (GO:0009733); response to light stimulus (GO:0009416)	-3.71	1.01e-10	7.65e-10	-2.57	2.04e-08	9.24e-08
		OE6A113723	anthocyanidin reductase	anthocyanidin reductase activity (GO:0033729); oxidoreductase activity, acting on the CH-OH group of donors, NAD or NADP as acceptor (GO:0016616); negative regulation of flavonoid biosynthetic process (GO:0009964)	-2.32	8.99e-07	2.82e-06	-2.89	7.01e-08	2.86e-07
	Fatty Acids	OE6A057230	probable glycerol-3-phosphate acyltransferase 3	phosphatase activity (GO:0016791); membrane (GO:0016020); lipid metabolic process (GO:0006629); glycerol-3-phosphate O-acyltransferase activity (GO:0004366)	27.45	3.03e-08	1.47e-07	14.84	0.0004	0.000949
		OE6A078092	phospholipid:diacylglycerol acyltransferase 1-like	cytoplasm (GO:0005737); lipid metabolic process (GO:0006629); membrane (GO:0016020); plastid (GO:0009536); plant-type vacuole (GO:0000325)	25.76	3.08e-16	8.98e-15	8.94	6.27e-14	9.84e-13
		OE6A002165	stearoyl-[acyl-carrier- ] 9-desaturase 6, chloroplastic	fatty acid metabolic process (GO:0006631); plastid (GO:0009536); cellular response to hypoxia (GO:0071456)	23.02	1.46e-05	3.63e-05	100.98	8.61e-09	4.28e-08
		OE6A115934	biotin carboxyl carrier of acetyl- carboxylase 1, chloroplastic-like	fatty acid biosynthetic process (GO:0006633); plastid (GO:0009536)	6.59	6.28e-14	1.07e-12	7.06	3.55e-14	7.15e-13
		OE6A077716	very-long-chain enoyl- reductase-like	very long-chain fatty acid biosynthetic process (GO:0042761); integral component of membrane (GO:0016021); fatty acid metabolic process (GO:0006631); cytosol (GO:0005829); trichome branching (GO:0010091); cuticle development (GO:0042335)	4.58	9.29e-11	7.58e-10	14.46	3.85e-14	7.15e-13
		OE6A042315	3-ketoacyl- synthase 6	fatty acid biosynthetic process (GO:0006633); integral component of membrane (GO:0016021); endoplasmic reticulum (GO:0005783); very-long-chain 3-ketoacyl-CoA synthase activity (GO:0102756); response to cold (GO:0009409); response to light stimulus (GO:0009416); mitochondrion (GO:0005739); wax biosynthetic process (GO:0010025)	4.05	8.83e-08	3.68e-07	6.18	3.18e-09	1.71e-08
		OE6A029462	3-ketoacyl- synthase 6	fatty acid biosynthetic process (GO:0006633); integral component of membrane (GO:0016021); response to cold (GO:0009409); response to light stimulus (GO:0009416); mitochondrion (GO:0005739); wax biosynthetic process (GO:0010025);	3.54	8.14e-08	3.53e-07	5.18	2.98e-09	1.64e-08
		OE6A106926	3-ketoacyl- synthase 19	transferase activity, transferring acyl groups other than amino-acyl groups (GO:0016747); membrane (GO:0016020); fatty acid biosynthetic process (GO:0006633); transferase activity (GO:0016740); very-long-chain 3-ketoacyl-CoA synthase activity (GO:0102756); response to cold (GO:0009409); response to light stimulus (GO:0009416)	2.75	9.23e-10	5.88e-09	3.17	1.21e-10	8.54e-10
		OE6A012975	stearoyl-[acyl-carrier- ] 9-desaturase, chloroplastic	fatty acid biosynthetic process (GO:0006633); integral component of membrane (GO:0016021); response to cold (GO:0009409); response to light stimulus (GO:0009416); mitochondrion (GO:0005739); wax biosynthetic process (GO:0010025)	2.09	1.44e-06	4.21e-06	2.19	7.37e-07	2.43e-06
		OE6A065720	very-long-chain enoyl- reductase	very long-chain fatty acid biosynthetic process (GO:0042761); integral component of membrane (GO:0016021); fatty acid metabolic process (GO:0006631); fatty acid elongase complex (GO:0009923); cytosol (GO:0005829); cuticle development (GO:0042335)	2.05	1.86e-07	6.79e-07	2.92	4.88e-10	3.21e-09
		OE6A063529	very-long-chain enoyl- reductase-like	fatty acid metabolic process (GO:0006631); endoplasmic reticulum membrane (GO:0005789); cytosol (GO:0005829); wax biosynthetic process (GO:0010025); trichome branching (GO:0010091); cuticle development (GO:0042335)	-8.19	2.74e-17	1.12e-15	-9.04	1.11e-17	4.53e-16
		OE6A056459	Malonyl- :ACP transacylase	mitochondrion (GO:0005739); fatty acid metabolic process (GO:0006631); fatty acid synthase activity (GO:0004312)	-6.3	5.06e-06	1.35e-05	-4.92	2.8e-06	8.54e-06
		OE6A102979	phospholipid:diacylglycerol acyltransferase 2	O-acyltransferase activity (GO:0008374); lipid metabolic process (GO:0006629)	-5.47	4.16e-07	1.39e-06	-5.05	7.5e-06	2.13e-05
		OE6A093605	phospholipid:diacylglycerol acyltransferase 2	O-acyltransferase activity (GO:0008374); lipid metabolic process (GO:0006629)	-4.95	1.02e-08	5.6e-08	-5.06	6.12e-08	2.55e-07
		OE6A007594	very-long-chain enoyl- reductase-like	integral component of membrane (GO:0016021); fatty acid metabolic process (GO:0006631); cytosol (GO:0005829); trichome papilla formation (GO:1905499); wax biosynthetic process (GO:0010025);	-4.77	2.72e-11	2.77e-10	-3.89	6.63e-10	4.22e-09
		OE6A000646	biotin carboxyl carrier of acetyl- carboxylase, chloroplastic-like	acetyl-CoA carboxylase activity (GO:0003989); fatty acid biosynthetic process (GO:0006633); acetyl-CoA carboxylase complex (GO:0009317); plastid (GO:0009536); fatty acid metabolic process (GO:0006631); chloroplast stroma (GO:0009570); chloroplast envelope (GO:0009941)	-2.96	7.51e-11	6.66e-10	-3.12	3.53e-11	2.77e-10
		OE6A086426	very-long-chain enoyl- reductase-like	integral component of membrane (GO:0016021); fatty acid metabolic process (GO:0006631); cytosol (GO:0005829); wax biosynthetic process (GO:0010025); cuticle development (GO:0042335)	-2.07	2.22e-07	7.96e-07	-2.3	3.93e-08	1.74e-07
Group II	Photoperception/Photosynthesis	OE6A103537	flowering locus T	cytoplasm (GO:0005737); nucleus (GO:0005634); cell differentiation (GO:0030154); photoperiodism, flowering (GO:0048573); positive regulation of flower development (GO:0009911); regulation of stomatal movement (GO:0010119)	30.54	0.00994	0.0149
		OE6A043940	zinc finger CONSTANS-LIKE 6	nucleus (GO:0005634); zinc ion binding (GO:0008270); transcription regulatory region sequence-specific DNA binding (GO:0000976); DNA-binding transcription factor activity (GO:0003700)	11.77	3.71e-09	2.23e-08
		OE6A106820	zinc finger CONSTANS-LIKE 6	nucleus (GO:0005634); zinc ion binding (GO:0008270); transcription regulatory region sequence-specific DNA binding (GO:0000976); DNA-binding transcription factor activity (GO:0003700)	6.85	7.48e-08	3.32e-07
		OE6A036399	cryptochrome-1 isoform X1	cytoplasm (GO:0005737); nucleus (GO:0005634); circadian regulation of gene expression (GO:0032922); plant organ development (GO:0099402); anthocyanin-containing compound metabolic process (GO:0046283); auxin transport (GO:0060918); response to high light intensity (GO:0009644); photoprotection (GO:0010117); response to stress (GO:0006950)	2.57	5.19e-10	3.53e-09
		OE6A091010	FAR1-RELATED SEQUENCE 5-like	zinc ion binding (GO:0008270); regulation of transcription, DNA-templated (GO:0006355); nucleus (GO:0005634); protein binding (GO:0005515)	2.31	0.000895	0.00159
		OE6A089246	transcription factor PIF1-like	nucleus (GO:0005634); red light signaling pathway (GO:0010161); negative gravitropism (GO:0009959); chlorophyll biosynthetic process (GO:0015995); gibberellin biosynthetic process (GO:0009686)	-17.63	1.78e-05	4.33e-05
		OE6A076354	photosystem I assembly factor PSA3, chloroplastic	stromal side of plastid thylakoid membrane (GO:0098572)	-4.08	0.000278	0.000531
		OE6A078915	transcription factor PIF4	nucleus (GO:0005634); regulation of auxin biosynthetic process (GO:0010600); regulation of auxin mediated signaling pathway (GO:0010928); phototropism (GO:0009638)	-2.38	1.06e-07	4.31e-07
		OE6A106143	chlorophyll a-b binding 151, chloroplastic	response to light stimulus (GO:0009416); photosynthesis, light harvesting (GO:0009765); plastid (GO:0009536); photosystem II (GO:0009523); integral component of membrane (GO:0016021);	-2.18	1.79e-07	6.65e-07
		OE6A086099	LOV domain-containing	photoreceptor activity (GO:0009881); response to stimulus (GO:0050896); phosphorylation (GO:0016310); blue light signaling pathway (GO:0009785)	-2.02	2.31e-08	1.18e-07
	Phenylpropanoids	OE6A040780	flavonol synthase	response to light stimulus (GO:0009416); flavonoid biosynthetic process (GO:0009813); cytoplasm (GO:0005737); nucleus (GO:0005634); response to auxin (GO:0009733)	18.46	5.08e-06	1.35e-05
		OE6A030751	dihydroflavonol 4-reductase	flavanone 4-reductase activity (GO:0047890); oxidoreductase activity, acting on the CH-OH group of donors, NAD or NADP as acceptor (GO:0016616); anthocyanin-containing compound biosynthetic process (GO:0009718)	7.06	0.01	0.015
		OE6A053999	UDP-glucose flavonoid 3-O-glucosyltransferase 6-like	UDP-glycosyltransferase activity (GO:0008194)	3.83	5.95e-07	1.93e-06
		OE6A099774	phenylalanine ammonia-lyase	ammonia-lyase activity (GO:0016841); cytoplasm (GO:0005737); phenylpropanoid metabolic process (GO:0009698); response to gibberellin (GO:0009739); phenylpropanoid biosynthetic process (GO:0009699)	3.18	1.21e-06	3.62e-06
		OE6A068581	naringenin 3-dioxygenase/flavonoid 3 -hydroxylase	response to light stimulus (GO:0009416); flavonoid biosynthetic process (GO:0009813); cytoplasm (GO:0005737); nucleus (GO:0005634); response to auxin (GO:0009733)	2.3	0.000481	0.000884
		OE6A074153	cinnamoyl- reductase 1-like	circadian rhythm (GO:0007623); cytoplasm (GO:0005737); nucleotide binding (GO:0000166); phenylpropanoid metabolic process (GO:0009698)	-5.17	1.11e-07	4.46e-07
	Fatty Acids	OE6A034993	3-oxoacyl-[acyl-carrier- ] synthase 3 A, chloroplastic-like	plastid (GO:0009536); lipid metabolic process (GO:0006629)	2.68	1.68e-05	4.13e-05
		OE6A011870	delta(12)-fatty-acid desaturase FAD2-like	lipid metabolic process (GO:0006629); integral component of membrane (GO:0016021); Delta12-fatty-acid desaturase activity (GO:0102985); omega-6 fatty acid desaturase activity (GO:0045485); palmitoleic acid delta 12 desaturase activity (GO:0102987); unsaturated fatty acid biosynthetic process (GO:0006636)	2.35	0.00153	0.00265
		OE6A051290	delta(12)-fatty-acid desaturase FAD2-like	lipid metabolic process (GO:0006629); integral component of membrane (GO:0016021); Delta12-fatty-acid desaturase activity (GO:0102985); omega-6 fatty acid desaturase activity (GO:0045485); palmitoleic acid delta 12 desaturase activity (GO:0102987); unsaturated fatty acid biosynthetic process (GO:0006636)	2.24	3.36e-08	1.59e-07
		OE6A013923	3-ketoacyl- synthase 15-like	transferase activity, transferring acyl groups other than amino-acyl groups (GO:0016747); fatty acid biosynthetic process (GO:0006633); integral component of membrane (GO:0016021); very-long-chain 3-ketoacyl-CoA synthase activity (GO:0102756)	-6.32	0.0102	0.0151
		OE6A044469	3-ketoacyl- synthase 6	membrane (GO:0016020); fatty acid biosynthetic process (GO:0006633); very-long-chain 3-ketoacyl-CoA synthase activity (GO:0102756); response to cold (GO:0009409); response to light stimulus (GO:0009416); mitochondrion (GO:0005739); wax biosynthetic process (GO:0010025);	-3.23	2.4e-12	2.72e-11
		OE6A068286	phospholipid:diacylglycerol acyltransferase 2	O-acyltransferase activity (GO:0008374); lipid metabolic process (GO:0006629)	-3.08	0.0342	0.0481
		OE6A001246	phospholipid:diacylglycerol acyltransferase 2	O-acyltransferase activity (GO:0008374); lipid metabolic process (GO:0006629)	-2.96	0.00177	0.00303
Group III	Photoperception/Photosynthesis	OE6A114109	chlorophyll a-b binding CP24 10A, chloroplastic	response to light stimulus (GO:0009416); membrane (GO:0016020); photosynthesis, light harvesting (GO:0009765); chlorophyll binding (GO:0016168); plastid (GO:0009536); chloroplast thylakoid membrane (GO:0009535)				22.4	1.87e-12	2.12e-11
		OE6A073013	photosystem II 22 kDa , chloroplastic	chloroplast thylakoid membrane (GO:0009535); photosynthesis (GO:0015979); integral component of membrane (GO:0016021); nucleus (GO:0005634)				17.21	1.33e-07	5.2e-07
		OE6A074596	phytochrome A	nucleus (GO:0005634); phosphorylation (GO:0016310); cytoplasm (GO:0005737); gravitropism (GO:0009630); phototropism (GO:0009638); photomorphogenesis (GO:0009640); response to continuous far red light stimulus by the high-irradiance response system (GO:0010201)				4.52	1.03e-07	4.12e-07
		OE6A024133	photosystem I reaction center subunit N, chloroplastic isoform X2	chloroplast photosystem I (GO:0030093); photosynthesis (GO:0015979); membrane (GO:0016020); plastid (GO:0009536); chloroplast thylakoid membrane (GO:0009535); protein domain specific binding (GO:0019904)				2.6	1.24e-06	3.94e-06
		OE6A012335	RNA polymerase sigma factor sigB	chloroplast (GO:0009507); cellular response to light stimulus (GO:0071482); chloroplast organization (GO:0009658); response to red light (GO:0010114)				2.29	0.000345	0.000828
		OE6A084581	kelch domain-containing 2-like	regulation of cytokinesis (GO:0032465); cell division (GO:0051301); cell cycle (GO:0007049); cytosol (GO:0005829)				-2.04	3.35e-05	8.88e-05
		OE6A044599	REVEILLE 6 isoform X1	nucleus (GO:0005634); regulation of circadian rhythm (GO:0042752)				-2.14	5.92e-09	3.02e-08
		OE6A114181	zinc finger CONSTANS-LIKE 10-like isoform X1	nucleus (GO:0005634); DNA-binding transcription factor activity (GO:0003700); protein binding (GO:0005515); regulation of transcription, DNA-templated (GO:0006355)				-9.47	1.55e-05	4.21e-05
	Phenylpropanoids	OE6A089986	probable cinnamyl alcohol dehydrogenase	lignin biosynthetic process (GO:0009809); cinnamyl-alcohol dehydrogenase activity (GO:0045551); cytosol (GO:0005829); phenylpropanoid biosynthetic process (GO:0009699)				2.7	2.6e-06	8.02e-06
		OE6A066812	chalcone isomerase	flavonoid biosynthetic process (GO:0009813); endoplasmic reticulum (GO:0005783); nucleus (GO:0005634); response to auxin (GO:0009733); cytosol (GO:0005829); chloroplast (GO:0009507); response to UV (GO:0009411)				2.28	1.95e-09	1.17e-08
	Fatty Acids	OE6A060413	very-long-chain enoyl- reductase-like	lipid metabolic process (GO:0006629); integral component of membrane (GO:0016021); fatty acid biosynthetic process (GO:0006633); cytosol (GO:0005829); wax biosynthetic process (GO:0010025); cuticle development (GO:0042335)				4.2	1.38e-06	4.33e-06
		OE6A018491	oleoyl-acyl carrier thioesterase 1, chloroplastic-like	plastid (GO:0009536); lipid metabolic process (GO:0006629); fatty acid metabolic process (GO:0006631); palmitoyl-[acyl-carrier-protein] hydrolase activity (GO:0016296)				3.04	1.55e-11	1.26e-10
		OE6A048706	3-ketoacyl- synthase 4	membrane (GO:0016020); fatty acid biosynthetic process (GO:0006633); very-long-chain 3-ketoacyl-CoA synthase activity (GO:0102756)				2.96	3.41e-07	1.24e-06
		OE6A030845	glycerol-3-phosphate acyltransferase, chloroplastic	phospholipid biosynthetic process (GO:0008654); chloroplast (GO:0009507)				-2.17	7.92e-06	2.21e-05

## Sheet: Table S5
Table S5. Summary of anthocyanin contents in 'Cellina di Nardò', 'Ruveia' and 'Salella' olive extracts during ripening stages. Data for anthocyanin contents are reported as mg/L of cyanidin 3-ritinoside. The analyses were performed as nine replicas and the standard error of the mean (s.e.m.) is reported. Different letters indicate significant differences among mean values of the three cultivars. …
	Turning		Ripe
	mean	s.e.m.	mean	s.e.m.
Cellina di Nardò	8.51a,*	± 0.44	29.99a	± 2.81
Ruveia	3.21b,*	± 0.09	6.59b	± 0.11
Salella	3.42b,*	± 0.22	8.94b	± 0.55

## Sheet: Table S6
Table S6. Summary of key DEGs in 'Ruveia' vs. 'Salella' comparison grouped according to the principal functions included in the gene panel and to Venn groups (Fig. 2C). FC: Fold change; FDR: adjusted p-value.
VENN Groups	Function/Panel	Gene_ID	Annotation	Gene Ontology terms	Turning			Ripe
					Ruveia vs. Salella			Ruveia vs. Salella
					FC	PValue	FDR	FC	PValue	FDR
Group I	Photoperception/Photosynthesis	OE6A012821	FAR-RED IMPAIRED RESPONSE 1-like	nucleus (GO:0005634); positive regulation of circadian rhythm (GO:0042753); negative regulation of leaf senescence (GO:1900056); response to red or far red light (GO:0009639); protein binding (GO:0005515)	759.37	1.4e-10	1.14e-09	118.87	5.27e-10	3.16e-09
		OE6A071307	zinc finger CONSTANS-LIKE 4-like	nucleus (GO:0005634); regulation of flower development (GO:0009909); zinc ion binding (GO:0008270); metal ion binding (GO:0046872)	626.12	1.12e-14	2.85e-13	172.42	6.45e-14	8.77e-13
		OE6A103537	flowering locus T	cytoplasm (GO:0005737); nucleus (GO:0005634); cell differentiation (GO:0030154); photoperiodism, flowering (GO:0048573); meristem determinacy (GO:0010022); positive regulation of flower development (GO:0009911); regulation of stomatal movement (GO:0010119)	100.27	0.000194	0.000454	60.06	0.00148	0.00288
		OE6A035887	CONSTANS-LIKE 1	nucleus (GO:0005634); regulation of flower development (GO:0009909); regulation of transcription, DNA-templated (GO:0006355)	24.81	5.5e-12	5.61e-11	28.34	1.58e-12	1.62e-11
		OE6A080272	chlorophyll a-b binding 8, chloroplastic	response to light stimulus (GO:0009416); photosynthesis, light harvesting in photosystem I (GO:0009768); membrane (GO:0016020); chlorophyll binding (GO:0016168); plastid (GO:0009536); photosystem II (GO:0009523)	9.45	9.44e-09	5.5e-08	57.68	8.65e-11	5.52e-10
		OE6A004297	photosystem I assembly factor PSA3, chloroplastic	stromal side of plastid thylakoid membrane (GO:0098572)	7.37	7.94e-07	3.45e-06	41.38	1.17e-08	5.18e-08
		OE6A114109	chlorophyll a-b binding CP24 10A, chloroplastic	response to light stimulus (GO:0009416); photosynthesis, light harvesting in photosystem I (GO:0009768); membrane (GO:0016020); chlorophyll binding (GO:0016168); plastid (GO:0009536); photosystem II (GO:0009523)	5.11	2.78e-12	3.15e-11	284.7	3.28e-18	2.52e-16
		OE6A015647	photosystem I reaction center subunit III (psaF)	photosystem I reaction center (GO:0009538); photosynthesis (GO:0015979); plastid (GO:0009536); integral component of membrane (GO:0016021); nucleus (GO:0005634)	4.74	9.11e-13	1.09e-11	247.13	7.81e-20	1.59e-17
		OE6A076354	photosystem I assembly factor PSA3, chloroplastic	stromal side of plastid thylakoid membrane (GO:0098572)	4.42	1.31e-06	5.44e-06	19.29	5.22e-09	2.6e-08
		OE6A010456	transcription factor PIL1-like (PIF3)	nucleus (GO:0005634); regulation of photosynthesis, light reaction (GO:0042548); regulation of plant organ morphogenesis (GO:1905421); circadian rhythm (GO:0007623); gibberellic acid mediated signaling pathway (GO:0009740); positive regulation of anthocyanin metabolic process (GO:0031539)	4.04	1.68e-06	6.71e-06	-2.16	0.000277	0.000681
		OE6A028974	photosystem I reaction center subunit psaK, chloroplastic	photosystem I (GO:0009522); photosynthesis (GO:0015979); plastid (GO:0009536); integral component of membrane (GO:0016021); chloroplast thylakoid membrane (GO:0009535); nucleus (GO:0005634);	3.59	1.55e-06	6.32e-06	54.98	9.94e-11	6.14e-10
		OE6A092384	chlorophyll a-b binding , chloroplastic	membrane (GO:0016020); chlorophyll binding (GO:0016168); plastid (GO:0009536); photosystem I (GO:0009522); photosystem II (GO:0009523); photosynthesis (GO:0015979)	3.51	7.43e-11	6.31e-10	54.17	1.5e-17	7.67e-16
		OE6A065557	RNA polymerase sigma factor sigE, chloroplastic mitochondrial	mitochondrion (GO:0005739); cellular response to blue light (GO:0071483); plastid (GO:0009536); response to red light (GO:0010114); chloroplast organization (GO:0009658); cellular response to salt stress (GO:0071472)	3.25	2.15e-11	1.99e-10	2.33	5.2e-09	2.6e-08
		OE6A066649	chlorophyll a-b binding CP26, chloroplastic	response to light stimulus (GO:0009416); photosynthesis, light harvesting in photosystem I (GO:0009768); chlorophyll binding (GO:0016168); integral component of membrane (GO:0016021); cytosol (GO:0005829)	2.55	5.71e-08	2.77e-07	24.7	2.2e-15	4.98e-14
		OE6A114181	zinc finger CONSTANS-LIKE 10-like isoform X1	nucleus (GO:0005634); DNA-binding transcription factor activity (GO:0003700); protein binding (GO:0005515); regulation of transcription, DNA-templated (GO:0006355)	2.36	0.017	0.0254	-3.24	0.000703	0.00153
		OE6A012335	RNA polymerase sigma factor sigB	cellular response to light stimulus (GO:0071482); chloroplast organization (GO:0009658); plastid (GO:0009536); response to red light (GO:0010114)	2.31	5.55e-05	0.000149	2.57	5.42e-05	0.000147
		OE6A050501	photosystem I chlorophyll a b-binding 6, chloroplastic	photosynthesis, light harvesting in photosystem I (GO:0009768); membrane (GO:0016020); chlorophyll binding (GO:0016168); plastid (GO:0009536); photosystem I (GO:0009522); chloroplast thylakoid membrane (GO:0009535)	2.3	4.91e-09	3.03e-08	3.86	2.6e-12	2.31e-11
		OE6A001158	photosystem I assembly factor PSA3, chloroplastic	stromal side of plastid thylakoid membrane (GO:0098572)	2.2	0.00424	0.00692	7.04	3.12e-05	8.83e-05
		OE6A029393	LOV domain-containing	protein kinase activity (GO:0004672); photoreceptor activity (GO:0009881); nucleotide binding (GO:0000166); response to stimulus (GO:0050896); phosphorylation (GO:0016310); blue light signaling pathway (GO:0009785)	2.1	4.02e-10	3.15e-09	2.46	2.06e-11	1.4e-10
		OE6A105055	LOV domain-containing	photoreceptor activity (GO:0009881); transferase activity (GO:0016740); response to stimulus (GO:0050896); phosphorylation (GO:0016310); blue light signaling pathway (GO:0009785);	-2.77	5.72e-11	5.08e-10	-2.3	1.61e-09	8.86e-09
		OE6A054446	zinc finger CONSTANS-LIKE 16-like	nucleus (GO:0005634); zinc ion binding (GO:0008270); DNA-binding transcription factor activity (GO:0003700); protein binding (GO:0005515)	-2.99	2.44e-09	1.66e-08	-11.76	1.57e-14	2.67e-13
		OE6A086983	photosystem II 10 kDa polypeptide, chloroplastic	photosystem II oxygen evolving complex (GO:0009654); photosynthesis (GO:0015979); membrane (GO:0016020); chloroplast (GO:0009507); thylakoid (GO:0009579)	-3.3	1.22e-08	6.89e-08	-2.04	1.3e-05	3.97e-05
		OE6A051654	photosystem II reaction center PSB28 , chloroplastic	membrane (GO:0016020); photosystem II oxygen evolving complex (GO:0009654); photosynthesis (GO:0015979); plastid (GO:0009536); chloroplast thylakoid membrane (GO:0009535)	-3.84	2.46e-05	7.37e-05	-4.8	5.92e-06	1.92e-05
		OE6A074596	phytochrome A	nucleus (GO:0005634); response to far red light (GO:0010218); photoreceptor activity (GO:0009881); phosphorylation (GO:0016310); cytoplasm (GO:0005737); phototropism (GO:0009638); photomorphogenesis (GO:0009640)	-7.69	1.89e-08	1.01e-07	-2.53	0.000389	0.000903
		OE6A078915	transcription factor PIF4	nucleus (GO:0005634); response to low fluence blue light stimulus by blue low-fluence system (GO:0010244); red or far-red light signaling pathway (GO:0010017); regulation of auxin biosynthetic process (GO:0010600); regulation of auxin mediated signaling pathway (GO:0010928); phototropism (GO:0009638)	-8.08	1.73e-13	2.52e-12	-5.31	6.87e-12	4.83e-11
		OE6A007397	LOV domain-containing	photoreceptor activity (GO:0009881); nucleotide binding (GO:0000166); response to stimulus (GO:0050896); phosphorylation (GO:0016310); blue light signaling pathway (GO:0009785)	-24.78	3.01e-17	2.55e-15	-23.34	6.73e-17	1.96e-15
		OE6A084581	kelch domain-containing 2-like	protein ubiquitination (GO:0016567); ubiquitin-protein transferase activity (GO:0004842); regulation of cytokinesis (GO:0032465); cell cycle (GO:0007049); cytosol (GO:0005829)	-27.22	7.03e-14	1.3e-12	-29.34	3.51e-14	5.11e-13
		OE6A018659	photosystem II reaction center W , chloroplastic-like	photosystem II stabilization (GO:0042549); photosynthesis (GO:0015979); plastid (GO:0009536); integral component of membrane (GO:0016021); chloroplast thylakoid membrane (GO:0009535)	-45.17	4.52e-16	1.84e-14	-11.06	9.69e-13	1.04e-11
		OE6A089246	transcription factor PIF1-like	nucleus (GO:0005634); phytochrome binding (GO:0010313); red light signaling pathway (GO:0010161); chlorophyll biosynthetic process (GO:0015995); gibberellic acid mediated signaling pathway (GO:0009740); negative regulation of photomorphogenesis (GO:0010100)	-103.61	3.32e-06	1.3e-05	-3.06	0.0227	0.0359
		OE6A092574	RNA polymerase sigma factor sigC	chloroplast (GO:0009507); cellular response to light stimulus (GO:0071482); regulation of RNA biosynthetic process (GO:2001141); DNA-binding transcription factor activity (GO:0003700)	-118.16	2.52e-08	1.32e-07	-290.91	6.29e-08	2.57e-07
		OE6A109185	RNA polymerase sigma factor sigC	chloroplast (GO:0009507); cellular response to light stimulus (GO:0071482); regulation of DNA-templated transcription, initiation (GO:2000142)	-742.53	3.72e-15	1.08e-13	-341.97	1.92e-14	3.01e-13
	Phenylpropanoids	OE6A011825	leucoanthocyanidin reductase	leucoanthocyanidin reductase activity (GO:0033788); proanthocyanidin biosynthetic process (GO:0010023)	75.98	1.56e-08	8.6e-08	27.06	1.11e-06	4.04e-06
		OE6A082229	dihydroflavonol 4-reductase	extrinsic component of endoplasmic reticulum membrane (GO:0042406); dihydrokaempferol 4-reductase activity (GO:0045552); flavanone 4-reductase activity (GO:0047890); anthocyanin-containing compound biosynthetic process (GO:0009718)	48.13	3.74e-17	2.55e-15	55.49	2.8e-17	1.14e-15
		OE6A049944	phenylalanine ammonia-lyase	ammonia-lyase activity (GO:0016841); cytoplasm (GO:0005737); L-phenylalanine catabolic process (GO:0006559); phenylpropanoid metabolic process (GO:0009698); response to gibberellin (GO:0009739); phenylpropanoid biosynthetic process (GO:0009699)	13.54	0.00158	0.00287	4.99	0.0111	0.0192
		OE6A074408	UDP-glucose flavonoid 3-O-glucosyltransferase 6-like	UDP-glycosyltransferase activity (GO:0008194)	12.91	1.52e-13	2.52e-12	30.63	5.02e-15	9.32e-14
		OE6A095147	phenylalanine ammonia-lyase	ammonia-lyase activity (GO:0016841); cytoplasm (GO:0005737); L-phenylalanine catabolic process (GO:0006559); phenylpropanoid metabolic process (GO:0009698); response to gibberellin (GO:0009739); phenylpropanoid biosynthetic process (GO:0009699)	10.75	0.000161	0.000401	18.54	5.5e-05	0.000148
		OE6A081156	flavone synthase II	iron ion binding (GO:0005506); monooxygenase activity (GO:0004497); oxidoreductase activity (GO:0016491); membrane (GO:0016020); sesquiterpene biosynthetic process (GO:0051762)	8.58	1.92e-15	6.54e-14	4.15	3.34e-12	2.77e-11
		OE6A053999	UDP-glucose flavonoid 3-O-glucosyltransferase 6-like	UDP-glycosyltransferase activity (GO:0008194)	3.88	5.35e-07	2.37e-06	7.88	1.87e-09	1e-08
		OE6A108606	trans-cinnamate 4-monooxygenase	trans-cinnamate 4-monooxygenase activity (GO:0016710); lignin metabolic process (GO:0009808); integral component of membrane (GO:0016021); plant-type cell wall (GO:0009505); plant-type vacuole (GO:0000325); phenylpropanoid metabolic process (GO:0009698)	-2.26	0.000658	0.00132	-2.76	2.91e-05	8.48e-05
		OE6A068581	flavonoid 3 -hydroxylase	integral component of membrane (GO:0016021); flavonoid 3',5'-hydroxylase activity (GO:0033772); heme binding (GO:0020037); iron ion binding (GO:0005506); flavonoid biosynthetic process (GO:0009813)	-3.33	0.00012	0.000307	-17.97	4.99e-07	1.85e-06
		OE6A113723	anthocyanidin reductase	anthocyanidin reductase activity (GO:0033729); oxidoreductase activity, acting on the CH-OH group of donors, NAD or NADP as acceptor (GO:0016616); negative regulation of flavonoid biosynthetic process (GO:0009964)	-3.64	2.2e-09	1.55e-08	-3.31	8.29e-09	3.84e-08
		OE6A104547	diihydroflavonol 4-reductase	anthocyanin-containing compound biosynthetic process (GO:0009718); dihydrokaempferol 4-reductase activity (GO:0045552); flavonoid biosynthetic process (GO:0009813); flavanone 4-reductase activity (GO:0047890); extrinsic component of endoplasmic reticulum membrane (GO:0042406)	-5.92	1.08e-05	3.55e-05	-2.83	0.00143	0.00282
		OE6A055813	flavonol synthase flavanone 3-hydroxylase-like	cytoplasm (GO:0005737); nucleus (GO:0005634); flavonol synthase activity (GO:0045431); L-ascorbic acid binding (GO:0031418); flavonoid biosynthetic process (GO:0009813); response to auxin (GO:0009733); response to light stimulus (GO:0009416)	-6.11	7.13e-13	9.09e-12	-3.13	9.95e-10	5.8e-09
		OE6A117416	cinnamoyl- reductase-like SNL6 isoform X2	3-beta-hydroxy-delta5-steroid dehydrogenase activity (GO:0003854); steroid biosynthetic process (GO:0006694)	-12359.7	1.67e-13	2.52e-12	-14475.2	1.31e-13	1.67e-12
	Fatty Acids	OE6A078092	phospholipid:diacylglycerol acyltransferase 1-like	cytoplasm (GO:0005737); lipid metabolic process (GO:0006629); membrane (GO:0016020); glycerol metabolic process (GO:0006071); phospholip (GO:0046027); triglyceride biosynthetic process (GO:0019432); plastid (GO:0009536)	12.3	2.41e-14	5.46e-13	4.39	4.13e-11	2.72e-10
		OE6A077716	very-long-chain enoyl- reductase-like	integral component of membrane (GO:0016021); fatty acid metabolic process (GO:0006631); fatty acid biosynthetic process (GO:0006633); fatty acid elongase activity (GO:0009922); cytosol (GO:0005829); wax biosynthetic process (GO:0010025); sphingolipid metabolic process (GO:0006665)	9.23	1.93e-13	2.62e-12	21.2	3.79e-15	7.74e-14
		OE6A115934	biotin carboxyl carrier of acetyl- carboxylase 1, chloroplastic-like	acetyl-CoA carboxylase activity (GO:0003989); chloroplast (GO:0009507); fatty acid biosynthetic process (GO:0006633); plastid (GO:0009536); fatty acid metabolic process (GO:0006631); chloroplast stroma (GO:0009570); chloroplast envelope (GO:0009941)	6.71	5.35e-14	1.09e-12	4.64	1.68e-12	1.63e-11
		OE6A057230	probable glycerol-3-phosphate acyltransferase 3	phosphatase activity (GO:0016791); membrane (GO:0016020); phospholipid biosynthetic process (GO:0008654); lipid metabolic process (GO:0006629); glycerol-3-phosphate O-acyltransferase activity (GO:0004366)	6.42	0.000493	0.00104	20.88	2.8e-05	8.41e-05
		OE6A048706	3-ketoacyl- synthase 4	transferase activity, transferring acyl groups other than amino-acyl groups (GO:0016747); membrane (GO:0016020); fatty acid biosynthetic process (GO:0006633); integral component of membrane (GO:0016021); very-long-chain 3-ketoacyl-CoA synthase activity (GO:0102756)	2.28	6.16e-06	2.2e-05	4	6.98e-09	3.39e-08
		OE6A065720	very-long-chain enoyl- reductase	integral component of membrane (GO:0016021); fatty acid metabolic process (GO:0006631); very-long-chain enoyl-CoA reductase activity (GO:0102758); fatty acid elongase complex (GO:0009923); cytosol (GO:0005829); wax biosynthetic process (GO:0010025); sphingolipid metabolic process (GO:0006665)	2.27	2.76e-08	1.41e-07	5.81	1.53e-13	1.83e-12
		OE6A034993	3-oxoacyl-[acyl-carrier- ] synthase 3 A, chloroplastic-like	fatty acid biosynthetic process (GO:0006633); plastid (GO:0009536); chloroplast (GO:0009507); fatty acid metabolic process (GO:0006631); beta-ketoacyl-acyl-carrier-protein synthase III activity (GO:0033818)	2.13	0.000353	0.000783	2.07	0.000364	0.000854
		OE6A051290	delta(12)-fatty-acid desaturase FAD2-like	lipid metabolic process (GO:0006629); integral component of membrane (GO:0016021); fatty acid biosynthetic process (GO:0006633); Delta12-fatty-acid desaturase activity (GO:0102985); omega-6 fatty acid desaturase activity (GO:0045485); palmitoleic acid delta 12 desaturase activity (GO:0102987); unsaturated fatty acid biosynthetic process (GO:0006636)	-2.8	1.19e-09	9.01e-09	-4.62	1.94e-12	1.79e-11
		OE6A011870	delta(12)-fatty-acid desaturase FAD2-like	lipid metabolic process (GO:0006629); integral component of membrane (GO:0016021); fatty acid biosynthetic process (GO:0006633); Delta12-fatty-acid desaturase activity (GO:0102985); omega-6 fatty acid desaturase activity (GO:0045485); palmitoleic acid delta 12 desaturase activity (GO:0102987); unsaturated fatty acid biosynthetic process (GO:0006636)	-3.02	0.000483	0.00103	-3.67	6.58e-05	0.000174
		OE6A102979	phospholipid:diacylglycerol acyltransferase 2	O-acyltransferase activity (GO:0008374); lipid metabolic process (GO:0006629)	-3.66	9.15e-06	3.16e-05	-2.63	0.000411	0.000942
		OE6A068286	phospholipid:diacylglycerol acyltransferase 2	O-acyltransferase activity (GO:0008374); lipid metabolic process (GO:0006629)	-77.89	0.000277	0.000635	-310.91	1.44e-06	5.06e-06
		OE6A001246	phospholipid:diacylglycerol acyltransferase 2	O-acyltransferase activity (GO:0008374); lipid metabolic process (GO:0006629)	-149.63	4.84e-07	2.19e-06	-206.47	1.34e-07	5.27e-07
		OE6A106926	3-ketoacyl- synthase 19	transferase activity, transferring acyl groups other than amino-acyl groups (GO:0016747); membrane (GO:0016020); fatty acid biosynthetic process (GO:0006633); very-long-chain 3-ketoacyl-CoA synthase activity (GO:0102756); response to cold (GO:0009409); response to light stimulus (GO:0009416)	-217.56	2.68e-18	5.46e-16	-200.38	3.71e-18	2.52e-16
		OE6A095422	acetyl-coenzyme A carboxylase carboxyl transferase subunit alpha, chloroplastic-like isoform X1	acetyl-CoA carboxylase activity (GO:0003989); fatty acid biosynthetic process (GO:0006633); chloroplast (GO:0009507); lipid metabolic process (GO:0006629); endoplasmic reticulum (GO:0005783); malonyl-CoA biosynthetic process (GO:2001295)	-312.99	1.23e-16	6.27e-15	-252.98	4.85e-17	1.65e-15
Group II	Photoperception/Photosynthesis	OE6A091010	FAR1-RELATED SEQUENCE 5-like	zinc ion binding (GO:0008270); regulation of transcription, DNA-templated (GO:0006355); nucleus (GO:0005634); protein binding (GO:0005515)	6.1	4.57e-08	2.27e-07
		OE6A036399	cryptochrome-1 isoform X1	nucleus (GO:0005634); circadian regulation of gene expression (GO:0032922); FAD binding (GO:0071949); anthocyanin-containing compound metabolic process (GO:0046283); phototropism (GO:0009638); response to red light (GO:0010114); photoprotection (GO:0010117); photomorphogenesis (GO:0009640)	3.59	3.8e-12	4.08e-11
		OE6A072071	phytochrome-associated serine threonine- phosphatase	cytoplasm (GO:0005737); protein serine/threonine phosphatase activity (GO:0004722); phosphoprotein phosphatase activity (GO:0004721); nucleus (GO:0005634); negative regulation of flower development (GO:0009910); protein serine/threonine kinase activity (GO:0004674)	2.54	1.53e-05	4.86e-05
		OE6A073944	LOV domain-containing	ATP binding (GO:0005524); protein kinase activity (GO:0004672); photoreceptor activity (GO:0009881); nucleotide binding (GO:0000166); transferase activity (GO:0016740); response to stimulus (GO:0050896); phosphorylation (GO:0016310); blue light signaling pathway (GO:0009785);	-2.13	3.21e-09	2.11e-08
		OE6A008716	FLOWERING LOCUS D	oxidoreductase activity (GO:0016491); chromatin organization (GO:0006325); histone deacetylation (GO:0016575); regulation of timing of transition from vegetative to reproductive phase (GO:0048510); vegetative to reproductive phase transition of meristem (GO:0010228)	-2.13	5.76e-09	3.46e-08
	Phenylpropanoids	OE6A040780	flavonol synthase	response to light stimulus (GO:0009416); L-ascorbic acid binding (GO:0031418); flavonoid biosynthetic process (GO:0009813); cytoplasm (GO:0005737); nucleus (GO:0005634); naringenin 3-dioxygenase activity (GO:0045486); response to auxin (GO:0009733); flavonol biosynthetic process (GO:0051555)	15.16	1.78e-05	5.5e-05
		OE6A048764	phenylalanine ammonia-lyase	ammonia-lyase activity (GO:0016841); cytoplasm (GO:0005737); L-phenylalanine catabolic process (GO:0006559); phenylpropanoid metabolic process (GO:0009698); protein arginylation (GO:0016598); response to gibberellin (GO:0009739); phenylpropanoid biosynthetic process (GO:0009699)	2.74	0.000572	0.00117
		OE6A081102	leucoanthocyanidin dioxygenase	dioxygenase activity (GO:0051213); L-ascorbic acid binding (GO:0031418); leucocyanidin oxygenase activity (GO:0050589); metal ion binding (GO:0046872); anthocyanin-containing compound biosynthetic process (GO:0009718); proanthocyanidin biosynthetic process (GO:0010023)	-2.03	0.00467	0.0075
		OE6A005638	naringenin,2-oxoglutarate 3-dioxygenase	L-ascorbic acid binding (GO:0031418); anthocyanin-containing compound biosynthetic process (GO:0009718); proanthocyanidin biosynthetic process (GO:0010023); response to jasmonic acid (GO:0009753); response to wounding (GO:0009611)	-2.08	3.59e-06	1.38e-05
		OE6A074153	cinnamoyl- reductase 1-like	circadian rhythm (GO:0007623); cytoplasm (GO:0005737); lignin biosynthetic process (GO:0009809); phenylpropanoid metabolic process (GO:0009698)	-3.26	5.94e-06	2.16e-05
	Fatty Acids	OE6A060413	very-long-chain enoyl- reductase-like	very long-chain fatty acid biosynthetic process (GO:0042761); integral component of membrane (GO:0016021); fatty acid metabolic process (GO:0006631); fatty acid biosynthetic process (GO:0006633); fatty acid elongase activity (GO:0009922); cytosol (GO:0005829); sphingolipid metabolic process (GO:0006665)	2.42	2.61e-05	7.73e-05
		OE6A092496	biotin carboxyl carrier of acetyl- carboxylase 1, chloroplastic isoform X1	acetyl-CoA carboxylase complex (GO:0009317); lipid metabolic process (GO:0006629); fatty acid metabolic process (GO:0006631); chloroplast stroma (GO:0009570); chloroplast envelope (GO:0009941)	2.18	1.3e-09	9.5e-09
		OE6A012604	3-ketoacyl- synthase 20-like	fatty acid biosynthetic process (GO:0006633); integral component of membrane (GO:0016021); very-long-chain 3-ketoacyl-CoA synthase activity (GO:0102756); fatty acid elongase activity (GO:0009922); response to cold (GO:0009409); response to light stimulus (GO:0009416)	-3.12	3.44e-09	2.19e-08
Group III	Photoperception/Photosynthesis	OE6A073013	photosystem II 22 kDa , chloroplastic	photosynthesis (GO:0015979); integral component of membrane (GO:0016021); chlorophyll binding (GO:0016168); nucleus (GO:0005634)				67.27	3.94e-12	3e-11
		OE6A024133	photosystem I reaction center subunit N, chloroplastic isoform X2	chloroplast photosystem I (GO:0030093); photosynthesis (GO:0015979); membrane (GO:0016020); plastid (GO:0009536); chloroplast thylakoid membrane (GO:0009535)				22.5	1.01e-15	2.56e-14
		OE6A106143	chlorophyll a-b binding 151, chloroplastic	response to light stimulus (GO:0009416); chlorophyll binding (GO:0016168); plastid (GO:0009536); photosynthesis (GO:0015979); integral component of membrane (GO:0016021)				6.2	3.85e-13	4.36e-12
		OE6A083912	SPA1-RELATED 4-like isoform X1	response to blue light (GO:0009637); photomorphogenesis (GO:0009640); protein phosphorylation (GO:0006468); nucleotide binding (GO:0000166); red, far-red light phototransduction (GO:0009585)				3.19	1.2e-08	5.22e-08
		OE6A118632	LOV domain-containing	photoreceptor activity (GO:0009881); nucleotide binding (GO:0000166); response to stimulus (GO:0050896); phosphorylation (GO:0016310); blue light signaling pathway (GO:0009785);				3.03	0.00499	0.00918
		OE6A043940	zinc finger CONSTANS-LIKE 6	nucleus (GO:0005634); zinc ion binding (GO:0008270); transcription regulatory region sequence-specific DNA binding (GO:0000976); DNA-binding transcription factor activity (GO:0003700)				2.37	0.00302	0.00565
		OE6A114644	phytochrome A	nucleus (GO:0005634); detection of visible light (GO:0009584); cytoplasm (GO:0005737); red or far-red light photoreceptor activity (GO:0009883); gravitropism (GO:0009630); phototropism (GO:0009638); photomorphogenesis (GO:0009640)				2.37	7.78e-09	3.69e-08
		OE6A060484	EARLY FLOWERING 4-like	nucleus (GO:0005634); entrainment of circadian clock (GO:0009649); positive regulation of circadian rhythm (GO:0042753); red, far-red light phototransduction (GO:0009585); flower development (GO:0009908); photoperiodism, flowering (GO:0048573)				-2.07	0.000583	0.00129
		OE6A100286	phytochrome-interacting ankyrin-repeat 2-like	mitochondrion (GO:0005739); nucleus (GO:0005634); phytochrome binding (GO:0010313); positive regulation of anthocyanin biosynthetic process (GO:0031542); response to far red light (GO:0010218); response to high light intensity (GO:0009644); response to sucrose (GO:0009744)				-2.22	2.82e-09	1.48e-08
		OE6A045568	SPA1-RELATED 2	Cul4-RING E3 ubiquitin ligase complex (GO:0080008); nucleus (GO:0005634); ATP binding (GO:0005524); protein kinase activity (GO:0004672); photomorphogenesis (GO:0009640); red, far-red light phototransduction (GO:0009585)				-2.34	1.4e-09	7.95e-09
		OE6A047144	EARLY FLOWERING 3-like	regulation of photoperiodism, flowering (GO:2000028); red or far-red light signaling pathway (GO:0010017); nucleus (GO:0005634); response to cold (GO:0009409); response to auxin (GO:0009733); response to abscisic acid (GO:0009737); regulation of circadian rhythm (GO:0042752)				-15.81	0.0185	0.0302
	Phenylpropanoids	OE6A030751	tetraketide alpha-pyrone reductase 1-like	endoplasmic reticulum (GO:0005783); sporopollenin biosynthetic process (GO:0080110); pollen development (GO:0009555); cytoplasm (GO:0005737); nucleus (GO:0005634)				6.95	0.000796	0.00169
		OE6A106272	trans-resveratrol di-O-methyltransferase-like	O-methyltransferase activity (GO:0008171); protein dimerization activity (GO:0046983); S-adenosylmethionine-dependent methyltransferase activity (GO:0008757); methylation (GO:0032259)				3.14	0.00247	0.0047
		OE6A065332	trans-resveratrol di-O-methyltransferase-like	O-methyltransferase activity (GO:0008171); protein dimerization activity (GO:0046983); S-adenosylmethionine-dependent methyltransferase activity (GO:0008757); methylation (GO:0032259)				2.91	0.000905	0.00188
		OE6A098796	cinnamate 4-hydroxylase, partial	endoplasmic reticulum (GO:0005783); trans-cinnamate 4-monooxygenase activity (GO:0016710); lignin metabolic process (GO:0009808); pollen development (GO:0009555); ubiquinone biosynthetic process (GO:0006744)				-2.32	2.55e-08	1.08e-07
	Fatty Acids	OE6A013923	3-ketoacyl- synthase 15-like	transferase activity, transferring acyl groups other than amino-acyl groups (GO:0016747); fatty acid biosynthetic process (GO:0006633); integral component of membrane (GO:0016021); very-long-chain 3-ketoacyl-CoA synthase activity (GO:0102756)				43.92	3.25e-07	1.25e-06
		OE6A090531	3-ketoacyl- synthase 20-like	transferase activity, transferring acyl groups other than amino-acyl groups (GO:0016747); fatty acid biosynthetic process (GO:0006633); integral component of membrane (GO:0016021); very-long-chain 3-ketoacyl-CoA synthase activity (GO:0102756); fatty acid elongase activity (GO:0009922); response to cold (GO:0009409); response to light stimulus (GO:0009416)				3.63	4.13e-05	0.000115
		OE6A044469	3-ketoacyl- synthase 6	transferase activity, transferring acyl groups other than amino-acyl groups (GO:0016747); fatty acid biosynthetic process (GO:0006633); integral component of membrane (GO:0016021); very-long-chain 3-ketoacyl-CoA synthase activity (GO:0102756); response to cold (GO:0009409); response to light stimulus (GO:0009416); mitochondrion (GO:0005739)				3.16	3.39e-12	2.77e-11
		OE6A042315	3-ketoacyl- synthase 6	transferase activity, transferring acyl groups other than amino-acyl groups (GO:0016747); fatty acid biosynthetic process (GO:0006633); integral component of membrane (GO:0016021); very-long-chain 3-ketoacyl-CoA synthase activity (GO:0102756); response to cold (GO:0009409); response to light stimulus (GO:0009416); mitochondrion (GO:0005739)				2.04	0.000561	0.00126
		OE6A029462	3-ketoacyl- synthase 6	transferase activity, transferring acyl groups other than amino-acyl groups (GO:0016747); fatty acid biosynthetic process (GO:0006633); integral component of membrane (GO:0016021); very-long-chain 3-ketoacyl-CoA synthase activity (GO:0102756); response to cold (GO:0009409); response to light stimulus (GO:0009416); mitochondrion (GO:0005739)				2	0.000264	0.000656
		OE6A063529	very-long-chain enoyl- reductase-like	integral component of membrane (GO:0016021); fatty acid metabolic process (GO:0006631); fatty acid biosynthetic process (GO:0006633); very-long-chain enoyl-CoA reductase activity (GO:0102758); fatty acid elongase activity (GO:0009922); cytosol (GO:0005829); sphingolipid metabolic process (GO:0006665)				-2.73	3.97e-12	3e-11
		OE6A056459	Malonyl- :ACP transacylase	mitochondrion (GO:0005739); fatty acid biosynthetic process (GO:0006633); fatty acid metabolic process (GO:0006631); S-malonyltransferase activity (GO:0016419)				-5.73	3.65e-07	1.38e-06

## Sheet: Table S7
Table S7. Correlation analysis according to the threshold of Pearson’s correlation coefficient (PCC) > |0.90| among 18 Differential Accumulated Metabolites (DAMs) and 90 significant DEGs (Table 4 'Cellina di Nardò' vs. 'Salella' comparison).
	OE6A047144	OE6A071307	OE6A012821	OE6A080272	OE6A010456	OE6A028974	OE6A035887	OE6A117378	OE6A066649	OE6A092384	OE6A082516	OE6A114272	OE6A015647	OE6A037270	OE6A044285	OE6A073435	OE6A109185	OE6A024312	OE6A092574	OE6A018659	OE6A086983	OE6A054446	OE6A060484	OE6A083912	OE6A007397	OE6A081102	OE6A082229	OE6A049944	OE6A095147	OE6A074408	OE6A081156	OE6A048764	OE6A117416	OE6A108606	OE6A055813	OE6A113723	OE6A057230	OE6A078092	OE6A002165	OE6A115934	OE6A077716	OE6A042315	OE6A029462	OE6A106926	OE6A012975	OE6A065720	OE6A063529	OE6A056459	OE6A102979
OE6A047144		2.0685e-09	6.222e-06	0.047609	4.4223e-07	0.0864	2.6964e-05	3.9805e-06	0.00027553	0.19364	0.0052643	1.4988e-09	0.01003	1.7162e-07	5.4545e-07	0.00018452	1.7237e-05	1.6031e-05	8.9585e-06	0.012646	3.3695e-06	4.5e-07	0.00029116	0.054814	0.0037737	2.2262e-05	4.8723e-05	0.00050533	0.00033697	0.0050516	0.059606	0.07589	1.7047e-07	0.0026634	5.228e-05	1.8519e-05	0.043473	9.9145e-07	0.0010926	1.8761e-08	8.6316e-09	2.7295e-06	2.6108e-05	3.4099e-07	9.6301e-06	6.941e-06	0.0077671	0.0088475	0.00028379
OE6A071307	0.98782		0.00013266	0.12102	3.0592e-05	0.19551	1.6136e-06	7.1777e-05	0.0017344	0.35994	0.019303	1.2685e-06	0.030596	1.6508e-06	8.7319e-06	0.0005117	9.1871e-05	8.7944e-05	5.961e-05	0.016884	3.4207e-05	1.4712e-05	0.0005901	0.047878	0.0034706	1.5049e-06	0.0005383	0.00012175	5.2304e-05	0.020102	0.14286	0.035946	7.5782e-06	0.0047172	0.00028036	3.4733e-05	0.11137	3.2769e-05	0.0001652	8.8255e-08	9.8625e-08	5.6581e-05	0.00026124	1.6257e-06	0.00012279	2.0779e-05	0.013315	0.016464	0.00059991
OE6A012821	0.93855	0.88455		0.0070634	1.3842e-07	0.015118	0.00277	9.0916e-06	8.162e-05	0.062196	0.00092427	2.7345e-07	0.0022148	3.1726e-05	1.1726e-05	0.00045085	8.3395e-05	7.9625e-05	6.5982e-05	0.015465	3.5297e-05	7.8039e-06	0.0015199	0.095658	0.012766	0.0026751	1.5482e-05	0.0074151	0.0078178	0.0007291	0.010259	0.22252	1.0041e-05	0.0056516	0.00015755	0.00065139	0.0047005	7.2555e-06	0.022559	5.9997e-05	2.7462e-05	1.1463e-07	3.6859e-07	3.8957e-05	3.8442e-06	5.995e-05	0.011837	0.012933	0.00065088
OE6A080272	0.58094	0.47233	0.72972		0.0049928	3.2278e-10	0.50819	0.0087099	0.00040717	3.4109e-06	2.6582e-06	0.013184	4.3247e-05	0.023988	0.0093313	0.036893	0.025204	0.024836	0.022935	0.1287	0.020085	0.012236	0.080116	0.57237	0.30557	0.46834	0.00031468	0.61372	0.65212	2.1395e-07	1.6732e-08	0.50927	0.015408	0.063904	0.018645	0.096662	2.3493e-08	0.0081162	0.94816	0.062504	0.056695	0.0066843	0.0021424	0.03546	0.0019315	0.034296	0.054696	0.032417	0.069423
OE6A010456	0.9641	0.91481	0.97161	0.74969		0.013393	0.0019201	8.0114e-07	2.0553e-05	0.048927	0.0004085	1.1811e-09	0.0017689	1.6598e-06	5.3139e-07	3.5704e-05	1.9083e-06	1.7925e-06	8.9424e-07	0.0057642	8.5945e-07	2.6001e-08	0.00019099	0.054844	0.0046867	0.001623	2.104e-07	0.0078174	0.0076057	0.00019286	0.008951	0.2251	2.15e-07	0.0054447	5.8368e-06	5.319e-05	0.0055356	7.6411e-09	0.01941	4.3254e-06	6.0741e-06	2.342e-07	2.0257e-06	4.4686e-06	6.829e-07	4.2091e-05	0.011327	0.009731	0.00010852
OE6A028974	0.51533	0.40173	0.67928	0.99161	0.68799		0.6789	0.01622	0.0010935	9.638e-07	8.2933e-06	0.02789	4.493e-05	0.045322	0.018676	0.084056	0.059656	0.057987	0.05376	0.23434	0.044189	0.028631	0.15664	0.79096	0.48718	0.62582	0.0011517	0.7573	0.80569	4.561e-06	7.6382e-09	0.38505	0.031456	0.072898	0.045072	0.17739	6.8295e-09	0.018769	0.8763	0.10902	0.092364	0.015559	0.0052525	0.068267	0.0047065	0.054292	0.056832	0.034174	0.13589
OE6A035887	0.91699	0.95332	0.77996	0.21206	0.79675	0.13361		0.0025381	0.030361	0.94267	0.16169	0.00043413	0.19526	0.00055376	0.001602	0.0036236	0.0015788	0.0014937	0.0012282	0.032367	0.0010285	0.0011354	0.0019743	0.0375	0.0029728	1.6289e-10	0.018073	5.4062e-06	5.8299e-07	0.16604	0.55134	0.0052572	0.00073914	0.018488	0.0035108	0.00020646	0.47422	0.0018298	1.0792e-07	4.3533e-05	5.5387e-05	0.0023263	0.0080617	0.00027778	0.0066647	0.00089718	0.045399	0.063337	0.0027003
OE6A117378	0.9439	0.89839	0.93359	0.71679	0.95951	0.6741	0.7841		1.9316e-05	0.048485	0.00026386	3.9028e-07	0.00067754	1.3134e-05	7.5967e-08	0.00089286	8.5658e-05	5.0353e-05	4.6473e-05	0.032891	1.0421e-06	4.894e-06	0.0010681	0.137	0.018063	0.0013131	1.7982e-06	0.0034528	0.0040089	0.00048493	0.010253	0.17441	1.9571e-07	0.00061787	0.0001691	6.0168e-05	0.0085136	3.0688e-08	0.015386	1.8658e-06	1.2337e-06	1.1926e-05	2.0989e-05	2.7853e-06	4.8223e-06	9.707e-07	0.0020505	0.0028339	0.0014621
OE6A066649	0.86549	0.80116	0.89564	0.85397	0.9215	0.8199	0.62329	0.9225		0.0020586	9.0442e-07	2.5429e-05	1.4194e-06	0.00019758	2.6968e-05	0.0077943	0.0023387	0.0021431	0.0011564	0.11177	0.00038228	4.8458e-05	0.008793	0.47098	0.10942	0.025093	5.1894e-07	0.063327	0.062105	4.031e-06	0.00020284	0.71075	7.4549e-06	0.00024861	0.00087651	0.0045374	0.00073331	4.2483e-05	0.1239	0.00064444	0.00024621	6.7908e-06	1.6255e-06	0.00019312	2.8701e-07	0.00021614	0.00030269	0.0001817	0.018918
OE6A092384	0.40327	0.29035	0.553	0.94564	0.57819	0.95796	0.023313	0.5791	0.79367		7.2515e-05	0.080786	5.7504e-05	0.11955	0.058845	0.2429	0.18012	0.17656	0.1537	0.5604	0.11801	0.070327	0.31356	0.71579	0.86655	0.87661	0.0071022	0.94276	0.90281	9.8893e-05	6.2464e-08	0.18059	0.061634	0.054564	0.1126	0.32791	6.0036e-05	0.058771	0.62477	0.22358	0.18352	0.040574	0.017937	0.13448	0.016776	0.11713	0.032392	0.018029	0.36506
OE6A082516	0.74675	0.66085	0.82625	0.94833	0.85387	0.93483	0.43116	0.8667	0.9585	0.89817		0.00085972	1.0484e-08	0.0018461	0.00029067	0.019379	0.0082045	0.0075307	0.0056407	0.14418	0.0030429	0.00095256	0.035431	0.57484	0.22222	0.12956	3.311e-06	0.19576	0.21278	1.3891e-08	7.717e-07	0.97637	0.00064169	0.0039971	0.0049572	0.024372	1.1166e-05	0.00043904	0.39621	0.0062043	0.004168	0.00050875	0.00010651	0.0026714	4.5393e-05	0.0017054	0.0032223	0.0020052	0.034608
OE6A114272	0.98858	0.95555	0.96743	0.6891	0.98912	0.63069	0.85198	0.965	0.91799	0.52335	0.82891		0.0022559	1.434e-07	4.9938e-08	0.00017562	1.4828e-05	1.2398e-05	5.0561e-06	0.013843	2.3088e-06	5.3737e-08	0.00044365	0.079252	0.0074147	0.00035485	1.7497e-06	0.0026184	0.0022824	0.00077769	0.017507	0.15882	2.8563e-08	0.0021122	3.3946e-05	6.2665e-05	0.012112	5.5843e-08	0.0067563	3.2379e-07	1.2507e-07	8.3228e-08	1.1803e-06	7.1078e-07	2.3601e-07	5.4797e-06	0.005066	0.0047263	0.00030676
OE6A015647	0.70769	0.62261	0.79038	0.9085	0.80031	0.90778	0.40193	0.83736	0.95452	0.90295	0.98312	0.78955		0.0044689	0.00097281	0.06237	0.029299	0.027894	0.020262	0.33443	0.0097015	0.0026728	0.080681	0.93837	0.4156	0.15634	7.0788e-05	0.22265	0.23935	4.8951e-06	1.7355e-06	0.86745	0.0011532	0.00094923	0.014303	0.053405	8.005e-05	0.0017876	0.42751	0.012285	0.0060586	0.0010314	0.00024712	0.005202	0.00016115	0.0025307	0.0004958	0.00033047	0.098853
OE6A037270	0.97035	0.9531	0.91416	0.64341	0.95305	0.58585	0.84416	0.9284	0.87454	0.47397	0.79847	0.97141	0.75572		3.4984e-08	0.00020313	3.8176e-05	6.6085e-05	2.6644e-05	0.011483	6.9229e-05	7.2808e-08	0.00093641	0.06927	0.008402	0.00028387	1.1381e-05	0.0013767	0.0012431	0.0022517	0.029146	0.093092	8.9534e-07	0.005642	2.4385e-05	0.00029883	0.022487	5.4073e-07	0.0047174	1.6462e-07	9.9828e-08	3.5408e-05	8.2507e-05	2.164e-07	1.6179e-05	5.3784e-06	0.01117	0.012327	0.00031677
OE6A044285	0.96254	0.93414	0.93004	0.71239	0.96274	0.66341	0.80453	0.97485	0.91699	0.55897	0.86397	0.97689	0.82434	0.97849		0.00043524	4.8759e-05	4.0966e-05	2.4582e-05	0.020689	8.1187e-06	6.6812e-07	0.0012735	0.10343	0.014464	0.00078905	6.0874e-07	0.0022139	0.0024086	0.00055189	0.011463	0.13103	2.5283e-07	0.0019277	9.6047e-05	0.00014976	0.0089609	3.7751e-08	0.010874	1.2523e-07	1.0579e-07	1.0401e-05	1.2339e-05	7.4905e-08	1.2984e-06	7.7325e-08	0.0044339	0.0055126	0.00063551
OE6A073435	-0.87632	-0.84675	-0.85079	-0.60561	-0.91205	-0.51863	-0.76669	-0.82752	-0.72373	-0.36534	-0.66054	-0.87759	-0.55269	-0.87381	-0.8519		4.6859e-09	4.6601e-08	1.109e-07	3.3349e-06	2.654e-05	7.984e-05	7.4813e-07	0.00094332	6.1526e-06	0.0033622	0.00043759	0.010197	0.010161	0.0072416	0.088942	0.088943	0.00060415	0.12926	1.0066e-06	2.6863e-05	0.042878	4.6792e-05	0.021261	0.00018385	0.00094368	0.0014662	0.0032185	0.00032457	0.0015325	0.0029431	0.21652	0.20118	2.23e-06
OE6A109185	-0.92429	-0.89305	-0.89518	-0.63929	-0.9517	-0.55751	-0.80514	-0.89459	-0.78789	-0.41469	-0.72055	-0.92659	-0.62641	-0.91083	-0.9062	0.98565		1.7752e-11	2.9993e-08	9.2429e-05	4.6786e-07	6.1491e-06	3.8545e-06	0.0030521	6.4472e-05	0.0012957	7.1805e-05	0.0054982	0.0053703	0.003162	0.058606	0.094285	6.2042e-05	0.049898	7.0633e-07	1.4909e-06	0.030784	1.9869e-06	0.012958	1.7394e-05	0.00014072	0.00023666	0.0007132	3.761e-05	0.00039004	0.00061264	0.10167	0.10005	7.4306e-07
OE6A024312	-0.92541	-0.89401	-0.89618	-0.64052	-0.95231	-0.56054	-0.80745	-0.90558	-0.79187	-0.41778	-0.72584	-0.92924	-0.63068	-0.90011	-0.90952	0.97721	0.99531		4.8623e-09	0.00017949	6.7147e-08	1.6298e-05	3.8444e-06	0.003553	7.547e-05	0.0012721	6.8173e-05	0.0053551	0.0053148	0.0030285	0.05838	0.096745	7.0863e-05	0.044852	5.6262e-06	4.5862e-07	0.029648	2.0028e-06	0.013121	1.5108e-05	0.00014284	0.00019723	0.00057499	4.8242e-05	0.00026492	0.00046584	0.090288	0.087327	1.5229e-06
OE6A092574	-0.93379	-0.90222	-0.90014	-0.6471	-0.95859	-0.56852	-0.81537	-0.90713	-0.81773	-0.43868	-0.74286	-0.9411	-0.65705	-0.9172	-0.91856	0.97286	0.97915	0.98554		0.00037229	7.945e-07	1.1153e-05	9.5218e-07	0.0081507	0.00012488	0.0010584	4.4974e-05	0.0046645	0.0046719	0.0025501	0.047843	0.099078	4.4705e-05	0.038111	2.4152e-06	3.3671e-06	0.026271	1.3581e-06	0.012076	8.9526e-06	7.8121e-05	0.00014752	0.0004244	3.3624e-05	8.2444e-05	0.00029183	0.065939	0.055156	1.7013e-05
OE6A018659	-0.69201	-0.67109	-0.67762	-0.46393	-0.74162	-0.37157	-0.61759	-0.61615	-0.48292	-0.18709	-0.44795	-0.68564	-0.30538	-0.69865	-0.65539	0.94589	0.89291	0.87703	0.8567		0.0038992	0.0082107	0.00016637	8.1177e-06	2.066e-06	0.034	0.018045	0.054903	0.056183	0.062865	0.29771	0.095752	0.029743	0.62419	0.00057643	0.0023221	0.14037	0.0069796	0.081318	0.011949	0.032534	0.038184	0.056972	0.016587	0.042084	0.057367	0.83929	0.78918	6.1585e-05
OE6A086983	-0.94578	-0.91282	-0.91226	-0.65773	-0.95892	-0.58834	-0.82224	-0.95729	-0.8559	-0.47571	-0.77542	-0.94979	-0.70987	-0.89915	-0.93511	0.91726	0.96369	0.97547	0.95957	0.76292		1.1469e-05	2.4138e-05	0.025109	0.0010815	0.000778	2.2167e-05	0.0039606	0.0037583	0.0016964	0.037764	0.12972	4.5338e-06	0.0071795	2.7027e-05	5.2407e-08	0.024004	3.9801e-07	0.010496	3.9139e-06	2.4018e-05	3.7234e-05	0.00012797	1.0883e-05	5.3361e-05	7.7977e-05	0.021483	0.024238	0.00013637
OE6A054446	-0.96397	-0.92671	-0.93564	-0.6943	-0.97974	-0.62842	-0.81845	-0.94149	-0.90632	-0.53937	-0.82513	-0.97655	-0.78166	-0.97506	-0.96097	0.89612	0.9387	0.92515	0.93076	0.7205	0.93036		0.00038188	0.065405	0.0066257	0.0007132	2.4831e-06	0.0044106	0.0040591	0.0006812	0.016135	0.16748	1.7028e-08	0.0038003	1.3589e-06	8.5594e-05	0.0164	1.9176e-08	0.01046	1.169e-06	1.2182e-06	4.478e-06	3.0317e-05	3.9197e-07	1.6216e-05	3.7416e-05	0.0089847	0.0094667	0.00015403
OE6A060484	-0.86392	-0.84205	-0.80673	-0.52433	-0.87543	-0.43589	-0.79553	-0.8208	-0.71619	-0.31814	-0.60936	-0.8513	-0.52351	-0.82576	-0.81393	0.96006	0.94427	0.9443	0.95806	0.87897	0.91886	0.85593		0.004782	6.2678e-06	0.0019719	0.0015711	0.0075523	0.0068085	0.017277	0.14574	0.080347	0.00062694	0.078969	4.018e-06	6.3759e-06	0.09209	0.00016321	0.012723	0.00029262	0.0011232	0.0029464	0.0067874	0.00058402	0.0022804	0.0039872	0.14691	0.14144	0.00041548
OE6A083912	-0.56649	-0.58037	-0.50284	-0.18151	-0.56643	-0.085781	-0.60409	-0.45522	-0.23054	0.11763	-0.18036	-0.52561	-0.025063	-0.54108	-0.49298	0.82549	0.77527	0.76769	0.72096	0.93511	0.63961	0.54748	0.75205		1.6887e-05	0.041799	0.14433	0.053904	0.053817	0.36536	0.93402	0.028946	0.14305	0.95723	0.019699	0.008774	0.58915	0.05564	0.056586	0.045293	0.10907	0.16764	0.24389	0.076159	0.22053	0.16966	0.69105	0.70714	0.00047652
OE6A007397	-0.76461	-0.76888	-0.69136	-0.32315	-0.75315	-0.22242	-0.77655	-0.66597	-0.4857	-0.05444	-0.38063	-0.72678	-0.25937	-0.71906	-0.68249	0.93869	0.90062	0.89732	0.886	0.95092	0.82032	0.73353	0.93846	0.92461		0.0035897	0.025381	0.0082394	0.0074988	0.12715	0.52403	0.021014	0.014923	0.38464	0.00055463	0.00015483	0.31804	0.0048116	0.0099907	0.0032476	0.011486	0.026729	0.05099	0.0070002	0.033898	0.027629	0.59376	0.59121	0.00013144
OE6A081102	0.9202	0.95398	0.78162	0.23188	0.80398	0.15711	0.99269	0.8127	0.63966	0.050309	0.46302	0.85814	0.43616	0.86464	0.832	-0.77047	-0.81324	-0.81397	-0.82115	-0.61314	-0.83251	-0.83557	-0.79558	-0.59376	-0.76717		0.013778	2.9617e-07	1.9695e-08	0.14644	0.49536	0.0028574	0.00042266	0.013255	0.0025645	0.0001373	0.44563	0.00097285	5.8072e-08	1.0254e-05	1.5935e-05	0.0026142	0.008361	8.9637e-05	0.0063323	0.00029244	0.03493	0.055644	0.0023167
OE6A082229	0.90622	0.8451	0.92594	0.86168	0.96911	0.81789	0.66593	0.95228	0.96292	0.72939	0.94597	0.95255	0.89868	0.93047	0.9617	-0.85173	-0.89838	-0.89947	-0.90776	-0.66605	-0.92027	-0.94904	-0.80535	-0.44781	-0.63871	0.68597		0.035277	0.036392	1.4757e-06	0.00067001	0.46485	3.6193e-06	0.0040149	6.1579e-05	0.00075929	0.00045231	3.3781e-07	0.085355	8.9832e-05	8.3279e-05	8.8116e-06	4.0596e-06	4.0863e-05	2.2203e-07	9.2067e-05	0.0065576	0.0047698	0.0014042
OE6A049944	0.84715	0.8866	0.72678	0.16256	0.72354	0.099939	0.94029	0.76914	0.55103	-0.023278	0.40152	0.78263	0.38031	0.81079	0.7904	-0.7066	-0.74431	-0.74579	-0.75341	-0.56632	-0.7621	-0.75642	-0.72566	-0.56824	-0.72028	0.9669	0.60977		8.2316e-12	0.25531	0.62615	0.00016294	0.0030094	0.030141	0.0093038	0.0011562	0.55196	0.0037046	5.9561e-07	9.7082e-05	0.000141	0.013016	0.02559	0.00035751	0.021032	0.00032105	0.067214	0.12091	0.0066441
OE6A095147	0.85967	0.90483	0.72354	0.14538	0.72523	0.079626	0.96203	0.76147	0.55316	-0.039574	0.3879	0.78901	0.36791	0.81489	0.78654	-0.70684	-0.74563	-0.74621	-0.75332	-0.56389	-0.76482	-0.76082	-0.73191	-0.5684	-0.72609	0.98084	0.60689	0.99598		0.26634	0.66769	0.00028228	0.0026365	0.026699	0.0090307	0.00099042	0.58937	0.0040511	2.5659e-08	9.3536e-05	0.0001214	0.011436	0.02416	0.00038235	0.019598	0.00046952	0.062461	0.11056	0.0070622
OE6A074408	0.74904	0.65767	0.8348	0.969	0.87517	0.94232	0.42717	0.84848	0.94376	0.8914	0.98214	0.83252	0.94148	0.78963	0.84428	-0.72821	-0.77353	-0.77565	-0.78388	-0.55183	-0.80211	-0.83717	-0.66936	-0.28722	-0.4656	0.44572	0.95416	0.35652	0.3489		1.913e-06	0.88914	0.00081429	0.013312	0.0021035	0.016001	4.3456e-06	0.00036949	0.44364	0.0077884	0.0068336	0.00039948	0.00011187	0.0038415	5.6317e-05	0.0048014	0.013382	0.007153	0.016993
OE6A081156	0.5576	0.44927	0.7062	0.98146	0.71505	0.98416	0.19135	0.70624	0.87385	0.97582	0.95981	0.66836	0.95262	0.62687	0.69877	-0.51181	-0.55941	-0.55982	-0.58045	-0.32815	-0.60343	-0.67449	-0.44641	-0.026837	-0.20437	0.21836	0.83774	0.15695	0.13852	0.95168		0.44435	0.015441	0.028238	0.033938	0.15259	7.9797e-07	0.012541	0.97029	0.074429	0.056105	0.0077174	0.0023531	0.038579	0.0022836	0.030683	0.018465	0.010457	0.14495
OE6A048764	0.53066	0.60803	0.38041	-0.21153	0.37845	-0.27609	0.74682	0.41967	0.1198	-0.41429	-0.0096033	0.43383	-0.054073	0.50622	0.46145	-0.51181	-0.50464	-0.50143	-0.49844	-0.50272	-0.46284	-0.42586	-0.52399	-0.62747	-0.65415	0.77847	0.23365	0.87949	0.8648	-0.045171	-0.24419		0.1812	0.51394	0.14535	0.045056	0.5705	0.14991	0.00047676	0.032499	0.051975	0.33798	0.45441	0.054001	0.41561	0.057406	0.71682	0.92613	0.056688
OE6A117416	-0.97039	-0.93602	-0.93223	-0.67789	-0.96897	-0.62015	-0.83432	-0.96956	-0.93623	-0.55398	-0.83922	-0.97935	-0.81784	-0.95858	-0.96794	0.84126	0.90141	0.89866	0.90787	0.6251	0.94239	0.98139	0.84001	0.44909	0.68023	-0.85281	-0.94498	-0.77596	-0.78231	-0.83087	-0.67773	-0.41376		0.00030661	2.3145e-05	5.9431e-05	0.019267	4.8346e-08	0.0076158	5.098e-07	8.0773e-08	1.7359e-06	1.2525e-05	1.5481e-07	3.9063e-06	5.0157e-06	0.0012444	0.0019589	0.001366
OE6A108606	-0.78183	-0.7528	-0.74275	-0.55004	-0.74486	-0.53529	-0.66419	-0.84051	-0.86836	-0.56697	-0.76163	-0.79252	-0.82526	-0.74284	-0.79658	0.46334	0.57619	0.58688	0.60257	0.15784	0.72873	0.76425	0.52603	-0.017386	0.27632	-0.68872	-0.76139	-0.62393	-0.63443	-0.68842	-0.62962	-0.20925	0.86243		0.030037	0.018309	0.070529	0.00377	0.044952	0.0034514	0.00080236	0.0013052	0.0014316	0.0020502	0.0014656	0.00087682	8.1034e-09	6.9036e-06	0.15678
OE6A055813	-0.90484	-0.86499	-0.88034	-0.66354	-0.93934	-0.58639	-0.7683	-0.87856	-0.8282	-0.48194	-0.75008	-0.91296	-0.6833	-0.91869	-0.89206	0.95759	0.96053	0.9398	0.94933	0.84283	0.91695	0.95492	0.94379	0.65926	0.84411	-0.78361	-0.90156	-0.71258	-0.71449	-0.7927	-0.61331	-0.4468	0.91956	0.62423		6.1478e-05	0.024953	3.4679e-06	0.020732	5.6954e-05	0.00014587	0.0004	0.0010539	3.584e-05	0.00039697	0.00091308	0.060475	0.060216	0.00016819
OE6A113723	-0.92316	-0.91255	-0.83871	-0.50154	-0.9045	-0.41706	-0.87338	-0.90203	-0.7549	-0.30931	-0.64209	-0.90121	-0.5692	-0.86317	-0.8816	0.91706	0.95406	0.96383	0.94578	0.78822	0.97666	0.89461	0.93824	0.71633	0.88077	-0.88372	-0.83337	-0.81774	-0.82367	-0.67511	-0.43974	-0.58643	0.90228	0.66494	0.9016		0.11997	1.7623e-05	0.0023988	6.4765e-06	7.719e-05	0.00061375	0.0021552	3.4805e-05	0.0011694	0.00037313	0.051051	0.060716	0.00010133
OE6A057230	0.58994	0.48339	0.75299	0.98015	0.74392	0.98452	0.22891	0.71823	0.8346	0.90208	0.93074	0.69501	0.89606	0.6487	0.71498	-0.59129	-0.62207	-0.62538	-0.6358	-0.45179	-0.64336	-0.67327	-0.50755	-0.17376	-0.31536	0.24352	0.85069	0.19106	0.17365	0.94289	0.95954	-0.18238	-0.66099	-0.53905	-0.64013	-0.4735		0.0099323	0.88787	0.065073	0.052683	0.0069487	0.0018802	0.042377	0.0015758	0.031388	0.061261	0.03726	0.080627
OE6A078092	0.95772	0.91359	0.93659	0.72122	0.98416	0.66303	0.79885	0.97905	0.90884	0.55911	0.85163	0.97636	0.79986	0.96261	0.97816	-0.907	-0.9513	-0.95122	-0.95493	-0.73043	-0.96486	-0.98094	-0.87945	-0.56492	-0.75172	0.82434	0.966	0.76556	0.76092	0.85692	0.6926	0.44232	-0.97704	-0.76466	-0.94546	-0.92394	0.70833		0.013683	3.348e-07	1.2111e-06	1.376e-05	4.4196e-05	5.5644e-07	7.9617e-06	7.7316e-06	0.0090405	0.010078	0.00013464
OE6A002165	0.81993	0.87915	0.64844	0.021078	0.66041	-0.050437	0.973	0.67799	0.46914	-0.15757	0.26991	0.73237	0.25302	0.75279	0.70233	-0.65322	-0.69031	-0.68943	-0.69521	-0.52257	-0.70469	-0.70492	-0.69159	-0.56314	-0.70795	0.97618	0.5168	0.96187	0.97979	0.24456	0.012075	0.84902	-0.72515	-0.58666	-0.65523	-0.78673	0.045689	0.68647		0.00071184	0.0008215	0.023772	0.053283	0.0025531	0.045908	0.0043481	0.095726	0.14767	0.01355
OE6A115934	0.98103	0.97408	0.90209	0.55246	0.94294	0.48617	0.90838	0.95192	0.83908	0.37961	0.73738	0.96629	0.69402	0.9706	0.97218	-0.87641	-0.92415	-0.92631	-0.9338	-0.69594	-0.94409	-0.95628	-0.86377	-0.58591	-0.77221	0.93194	0.89354	0.89181	0.89265	0.72377	0.53291	0.61723	-0.96305	-0.76916	-0.90314	-0.93804	0.54804	0.96606	0.83564		9.812e-10	5.8646e-05	0.00022206	3.6089e-09	7.2355e-05	3.3495e-07	0.0097267	0.014049	0.00020584
OE6A077716	0.98377	0.97349	0.91668	0.56293	0.93885	0.50719	0.9037	0.9558	0.86862	0.41177	0.75943	0.97219	0.73876	0.97343	0.97311	-0.82548	-0.88312	-0.88276	-0.89659	-0.61713	-0.91895	-0.95591	-0.81886	-0.48612	-0.69864	0.9255	0.89521	0.88307	0.88666	0.73169	0.56404	0.57201	-0.97454	-0.83141	-0.88224	-0.89684	0.57062	0.95596	0.83056	0.98951		2.0934e-05	8.1996e-05	1.3614e-08	2.937e-05	9.4099e-08	0.0027646	0.0048755	0.0011351
OE6A042315	0.94805	0.90327	0.97267	0.73301	0.96843	0.67717	0.78814	0.9298	0.93744	0.59663	0.84693	0.97438	0.82214	0.9122	0.93174	-0.80822	-0.86971	-0.87459	-0.88197	-0.60239	-0.91128	-0.94254	-0.77698	-0.42572	-0.63433	0.78271	0.93402	0.69	0.69893	0.85455	0.72434	0.30325	-0.95262	-0.81294	-0.85451	-0.84073	0.7307	0.92771	0.64415	0.90255	0.9212		6.5751e-10	2.7221e-05	2.5658e-07	7.3808e-05	0.0028239	0.0022813	0.0017031
OE6A029462	0.91754	0.86698	0.9654	0.79188	0.95111	0.74687	0.72164	0.92116	0.95325	0.66651	0.88971	0.95619	0.86852	0.89541	0.92931	-0.77265	-0.83557	-0.84292	-0.85268	-0.56242	-0.88541	-0.91496	-0.7321	-0.36462	-0.57398	0.71937	0.94368	0.63802	0.64282	0.88858	0.78761	0.23899	-0.92909	-0.8092	-0.82131	-0.79161	0.79767	0.90809	0.56944	0.87143	0.89554	0.99032		8.0502e-05	3.7718e-08	8.4072e-05	0.0024795	0.0018695	0.0043027
OE6A106926	0.96594	0.95325	0.91045	0.60929	0.94256	0.54272	0.86525	0.94784	0.87514	0.45783	0.78169	0.96048	0.74741	0.96893	0.97492	-0.86078	-0.9111	-0.90641	-0.91313	-0.67242	-0.9311	-0.96496	-0.8424	-0.53025	-0.73025	0.89359	0.90956	0.85791	0.85589	0.76369	0.60142	0.56805	-0.97096	-0.79385	-0.91198	-0.91251	0.59243	0.96239	0.78382	0.98638	0.98221	0.91683	0.89594		4.4174e-05	1.0303e-07	0.0063231	0.010734	0.00052598
OE6A012975	0.93281	0.8864	0.9443	0.79649	0.9608	0.75292	0.73318	0.94166	0.96711	0.67158	0.90758	0.96838	0.87977	0.92527	0.95534	-0.80639	-0.85528	-0.86659	-0.89542	-0.59311	-0.90444	-0.92523	-0.78905	-0.38192	-0.61341	0.73619	0.96877	0.65408	0.65966	0.90337	0.78899	0.25937	-0.94412	-0.80823	-0.85475	-0.81729	0.80522	0.93537	0.58457	0.89822	0.91552	0.96784	0.97816	0.9081		3.7789e-05	0.0020973	0.0012	0.0043944
OE6A065720	0.93716	0.92132	0.90211	0.61235	0.90901	0.56749	0.82735	0.9579	0.87216	0.47671	0.80188	0.94012	0.78423	0.94035	0.97476	-0.77704	-0.84079	-0.84976	-0.86385	-0.56169	-0.89663	-0.91119	-0.76176	-0.4239	-0.6315	0.86379	0.893	0.86109	0.84951	0.75183	0.62236	0.56162	-0.94119	-0.82819	-0.8267	-0.85663	0.62034	0.93576	0.75718	0.96606	0.97374	0.8978	0.895	0.97326	0.91101		0.0023591	0.0052359	0.0030903
OE6A063529	-0.72394	-0.6884	-0.69658	-0.56671	-0.69958	-0.56268	-0.58568	-0.79385	-0.8628	-0.61753	-0.77259	-0.74888	-0.84777	-0.70053	-0.75614	0.385	0.49516	0.50998	0.54658	0.065682	0.65239	0.71482	0.44526	-0.12832	0.17164	-0.61067	-0.73414	-0.54445	-0.55253	-0.68805	-0.66429	-0.11719	0.81485	0.98397	0.55604	0.57386	-0.55464	-0.71442	-0.50275	-0.7097	-0.78005	-0.77904	-0.78519	-0.73628	-0.79284	-0.7875		1.0983e-07	0.25282
OE6A056459	-0.7158	-0.67298	-0.69045	-0.61746	-0.70967	-0.61268	-0.55101	-0.77886	-0.87672	-0.66612	-0.79484	-0.75269	-0.86025	-0.69379	-0.74416	0.3971	0.4972	0.51404	0.56583	0.086524	0.64255	0.71146	0.4507	-0.12135	0.17281	-0.56491	-0.75219	-0.47244	-0.48434	-0.72896	-0.70494	-0.030053	0.79587	0.93723	0.5565	0.55561	-0.60469	-0.70738	-0.44451	-0.68458	-0.75099	-0.78903	-0.79792	-0.7032	-0.81628	-0.74705	0.97291		0.24521
OE6A102979	-0.86465	-0.8415	-0.83874	-0.54083	-0.88928	-0.45636	-0.78118	-0.80833	-0.66241	-0.28739	-0.61152	-0.86242	-0.49872	-0.86149	-0.83955	0.95015	0.96012	0.95387	0.92449	0.90156	0.88389	0.8809	0.85334	0.84904	0.88477	-0.78833	-0.80999	-0.73336	-0.72973	-0.67061	-0.44719	-0.56295	0.81111	0.43575	0.87869	0.89085	-0.52358	-0.8842	-0.68716	-0.87346	-0.81846	-0.80194	-0.75774	-0.84585	-0.75662	-0.77466	0.35827	0.36368
OE6A093605	-0.90868	-0.88371	-0.87037	-0.5672	-0.92627	-0.4814	-0.82347	-0.86466	-0.72791	-0.32853	-0.65034	-0.90302	-0.54734	-0.87146	-0.86863	0.97087	0.98774	0.99099	0.96608	0.89216	0.95367	0.90201	0.92737	0.81927	0.91642	-0.82319	-0.84961	-0.74782	-0.75192	-0.71159	-0.4761	-0.53157	0.86503	0.53232	0.91404	0.95814	-0.55086	-0.91986	-0.71399	-0.90504	-0.85544	-0.84779	-0.80306	-0.87443	-0.81579	-0.8058	0.4472	0.45073	0.97412
OE6A007594	-0.89567	-0.87264	-0.85018	-0.57327	-0.91479	-0.48577	-0.80141	-0.8404	-0.72424	-0.33777	-0.65036	-0.88751	-0.54952	-0.89377	-0.86518	0.99067	0.99013	0.97605	0.95915	0.92609	0.92469	0.91855	0.94544	0.81984	0.92698	-0.8094	-0.85055	-0.74241	-0.74604	-0.71181	-0.48624	-0.54284	0.86577	0.50607	0.9631	0.93266	-0.55395	-0.91906	-0.70087	-0.89924	-0.85285	-0.81468	-0.77133	-0.88441	-0.79624	-0.79374	0.4173	0.4132	0.96073
OE6A000646	-0.90433	-0.85973	-0.88181	-0.68954	-0.90986	-0.64588	-0.74699	-0.9333	-0.94636	-0.62264	-0.84931	-0.92135	-0.86055	-0.89166	-0.90986	0.73171	0.80757	0.79881	0.80722	0.4863	0.87782	0.93461	0.75421	0.27705	0.54334	-0.76888	-0.90932	-0.68496	-0.69374	-0.82889	-0.71734	-0.28395	0.97353	0.92457	0.8652	0.82201	-0.66694	-0.92068	-0.63703	-0.88823	-0.92214	-0.91706	-0.90022	-0.91571	-0.90559	-0.88802	0.88219	0.85622	0.6801
OE6A086426	-0.96812	-0.94021	-0.91775	-0.61517	-0.96135	-0.54658	-0.8625	-0.90429	-0.87725	-0.45991	-0.75974	-0.96947	-0.72282	-0.96259	-0.92734	0.88454	0.91073	0.90109	0.93148	0.70625	0.90147	0.97534	0.87635	0.53492	0.7511	-0.86413	-0.90682	-0.76806	-0.7823	-0.77534	-0.59929	-0.43918	0.96397	0.7482	0.94083	0.87715	-0.60835	-0.94991	-0.75104	-0.94218	-0.94839	-0.92787	-0.8901	-0.93323	-0.9202	-0.87786	0.70962	0.71782	0.84415
OE6A103537	0.4781	0.41903	0.48029	0.80262	0.60559	0.75959	0.18619	0.5903	0.73242	0.81602	0.79798	0.55001	0.74572	0.55675	0.6188	-0.5444	-0.57399	-0.57424	-0.58	-0.41904	-0.58943	-0.61548	-0.50474	-0.19591	-0.32292	0.22566	0.73184	0.14281	0.13357	0.81756	0.79181	-0.12786	-0.60441	-0.4857	-0.60477	-0.51907	0.68587	0.63005	0.037418	0.51625	0.48222	0.56342	0.59718	0.58695	0.63579	0.5339	-0.49866	-0.5338	-0.4751
OE6A043940	0.4652	0.35646	0.62356	0.97816	0.65525	0.96478	0.088782	0.60366	0.78135	0.95393	0.89247	0.58108	0.8487	0.54068	0.60995	-0.53327	-0.5568	-0.55468	-0.56152	-0.41857	-0.55953	-0.60753	-0.44364	-0.13629	-0.25242	0.10944	0.77969	0.038451	0.018928	0.92258	0.96076	-0.2979	-0.57867	-0.44838	-0.58838	-0.40962	0.92879	0.62308	-0.10509	0.44522	0.44535	0.64346	0.70626	0.52143	0.70194	0.50692	-0.47593	-0.53475	-0.46816
OE6A106820	0.42055	0.30268	0.59999	0.96677	0.62477	0.95748	0.043904	0.58208	0.74553	0.9465	0.86709	0.54294	0.82224	0.47962	0.56499	-0.49612	-0.52637	-0.53047	-0.52775	-0.38814	-0.54043	-0.56273	-0.40598	-0.12428	-0.22249	0.063503	0.74437	-0.0053879	-0.028961	0.90156	0.94525	-0.33472	-0.53746	-0.42098	-0.53892	-0.38905	0.91556	0.58998	-0.15174	0.40042	0.397	0.61682	0.67805	0.47123	0.66209	0.46512	-0.44835	-0.51056	-0.44848
OE6A036399	0.88366	0.81658	0.92274	0.87143	0.95597	0.83337	0.63058	0.92474	0.94258	0.73412	0.94137	0.93627	0.89466	0.9258	0.94321	-0.83067	-0.87793	-0.87004	-0.87281	-0.6564	-0.87758	-0.94478	-0.75085	-0.43743	-0.59754	0.65136	0.9884	0.57679	0.57231	0.9513	0.84834	0.20315	-0.92162	-0.7253	-0.8848	-0.78115	0.86633	0.94724	0.48312	0.86499	0.87275	0.92226	0.93329	0.88404	0.9444	0.86415	-0.702	-0.72542	-0.81413
OE6A091010	0.42258	0.45365	0.32194	-0.022931	0.40316	-0.13282	0.53924	0.32043	0.10122	-0.23546	0.018035	0.36196	-0.10614	0.39528	0.34474	-0.66547	-0.63037	-0.61252	-0.5535	-0.76726	-0.50764	-0.44537	-0.62628	-0.87148	-0.79841	0.55094	0.26694	0.54367	0.53909	0.10284	-0.13521	0.67337	-0.36367	0.017298	-0.55081	-0.64109	-0.10084	0.43654	0.54939	0.48997	0.38463	0.27774	0.1899	0.46717	0.17936	0.33007	0.13634	0.18989	-0.71263
OE6A089246	-0.68192	-0.64087	-0.69119	-0.64171	-0.77032	-0.57425	-0.50919	-0.67116	-0.61375	-0.44383	-0.65862	-0.71958	-0.53712	-0.77262	-0.74991	0.83936	0.82145	0.81112	0.80971	0.81659	0.70185	0.77277	0.69085	0.71065	0.70174	-0.53915	-0.76455	-0.50918	-0.48774	-0.70339	-0.56344	-0.37415	0.67218	0.27728	0.77247	0.67834	-0.59797	-0.77927	-0.40732	-0.72435	-0.66035	-0.6545	-0.64355	-0.72245	-0.67045	-0.66463	0.25742	0.28099	0.8857
OE6A076354	-0.55165	-0.55393	-0.5238	-0.24738	-0.56987	-0.16809	-0.54415	-0.43398	-0.25891	0.032343	-0.25269	-0.53231	-0.11403	-0.61054	-0.52368	0.77352	0.72318	0.69368	0.66315	0.86904	0.53422	0.59288	0.6162	0.89492	0.78189	-0.55319	-0.47362	-0.5518	-0.54036	-0.32833	-0.12873	-0.59795	0.4544	-0.021681	0.6481	0.58146	-0.24341	-0.5709	-0.51584	-0.58198	-0.50518	-0.43302	-0.38384	-0.54709	-0.38589	-0.45132	-0.094116	-0.090581	0.85494
OE6A078915	-0.56091	-0.49131	-0.62144	-0.64742	-0.6958	-0.57438	-0.36912	-0.54717	-0.51954	-0.43108	-0.53963	-0.60295	-0.39993	-0.55772	-0.54511	0.83437	0.80001	0.7885	0.74855	0.88408	0.69281	0.64313	0.74814	0.76921	0.76492	-0.34805	-0.67183	-0.23173	-0.23695	-0.67822	-0.50697	-0.072516	0.5481	0.13655	0.74675	0.66062	-0.61323	-0.65239	-0.20566	-0.51962	-0.45197	-0.58255	-0.55971	-0.50816	-0.56845	-0.38801	0.068501	0.13319	0.79165
OE6A106143	-0.42677	-0.45959	-0.34158	0.016752	-0.40186	0.11273	-0.53255	-0.27019	-0.043267	0.30654	0.025264	-0.36685	0.17297	-0.41092	-0.32406	0.71554	0.63678	0.61748	0.5843	0.87191	0.46581	0.40536	0.65606	0.96563	0.86777	-0.5171	-0.26099	-0.50567	-0.50939	-0.084912	0.16717	-0.65405	0.29225	-0.18209	0.55126	0.57401	0.018497	-0.4014	-0.52897	-0.44744	-0.3484	-0.25159	-0.17848	-0.38811	-0.2033	-0.26404	-0.29023	-0.28463	0.72569
OE6A086099	-0.89892	-0.84895	-0.89053	-0.74507	-0.9342	-0.69053	-0.72496	-0.95939	-0.93844	-0.64382	-0.86766	-0.92551	-0.83763	-0.85655	-0.91994	0.80967	0.87314	0.89088	0.89305	0.59647	0.95793	0.90383	0.84195	0.41325	0.65806	-0.74136	-0.93546	-0.66188	-0.66287	-0.87012	-0.73185	-0.29121	0.94922	0.84399	0.86491	0.90439	-0.71388	-0.9403	-0.5886	-0.89506	-0.89196	-0.92063	-0.91245	-0.9071	-0.93274	-0.89366	0.79752	0.78647	0.74703
OE6A040780	0.40964	0.30903	0.52216	0.92594	0.59747	0.90429	0.048551	0.55946	0.74407	0.93763	0.84861	0.51872	0.80189	0.47966	0.55734	-0.49869	-0.52199	-0.52493	-0.53227	-0.3845	-0.53862	-0.56134	-0.44156	-0.11544	-0.23908	0.073917	0.7328	-0.012785	-0.02853	0.88327	0.90987	-0.32884	-0.54474	-0.43429	-0.55711	-0.41416	0.84078	0.58444	-0.13985	0.40847	0.39308	0.57248	0.62611	0.48375	0.64196	0.45259	-0.46315	-0.52131	-0.41758
OE6A030751	0.49063	0.43576	0.55773	0.34341	0.55846	0.29402	0.44817	0.58611	0.44483	0.25055	0.43295	0.51652	0.40598	0.51824	0.53738	-0.56146	-0.57282	-0.56143	-0.57095	-0.48685	-0.53976	-0.58679	-0.53503	-0.4136	-0.49725	0.51489	0.49047	0.5915	0.53531	0.41132	0.35039	0.53304	-0.55299	-0.37041	-0.60182	-0.56834	0.28805	0.61168	0.44046	0.58897	0.55492	0.47987	0.43893	0.61192	0.41547	0.59815	-0.33961	-0.29657	-0.60013
OE6A053999	0.5227	0.42231	0.62044	0.94161	0.68775	0.91759	0.17239	0.6364	0.83655	0.95086	0.89472	0.62392	0.86565	0.57219	0.62889	-0.54188	-0.57811	-0.57592	-0.58915	-0.38755	-0.60572	-0.65971	-0.49776	-0.10035	-0.26786	0.1837	0.80189	0.059414	0.058302	0.93113	0.93774	-0.32777	-0.65118	-0.5631	-0.63126	-0.47625	0.86891	0.65838	-0.027752	0.48891	0.4958	0.6864	0.72691	0.55662	0.73669	0.51471	-0.5893	-0.65432	-0.45882
OE6A099774	0.78583	0.71103	0.8851	0.84072	0.88439	0.80876	0.54189	0.86783	0.84215	0.67968	0.88205	0.85095	0.8232	0.84418	0.88309	-0.81648	-0.82773	-0.83003	-0.85618	-0.68689	-0.81057	-0.84102	-0.74113	-0.47161	-0.61842	0.57824	0.91097	0.5865	0.55264	0.87722	0.8106	0.31075	-0.81112	-0.56952	-0.83061	-0.71611	0.85531	0.88434	0.41561	0.8046	0.79463	0.82133	0.84948	0.82614	0.87233	0.84676	-0.55862	-0.57516	-0.77756
OE6A068581	0.33715	0.21708	0.48259	0.89259	0.51648	0.92745	-0.043271	0.5429	0.67656	0.90744	0.82676	0.45527	0.80725	0.40309	0.49827	-0.33476	-0.38675	-0.40051	-0.3911	-0.19657	-0.44708	-0.45143	-0.26715	0.04955	-0.047052	-0.01641	0.67499	-0.085146	-0.10167	0.83027	0.88723	-0.44422	-0.46536	-0.45892	-0.39904	-0.27436	0.88577	0.51481	-0.20987	0.31194	0.33397	0.48734	0.55595	0.34106	0.58356	0.38615	-0.49495	-0.53518	-0.28865
OE6A074153	-0.73702	-0.70362	-0.71988	-0.57025	-0.79776	-0.48851	-0.62041	-0.71452	-0.59269	-0.32049	-0.5644	-0.74607	-0.4264	-0.7017	-0.71435	0.93399	0.90869	0.92272	0.90557	0.93272	0.85454	0.72998	0.90415	0.85911	0.9189	-0.60883	-0.74904	-0.53312	-0.53449	-0.66253	-0.43665	-0.38536	0.67984	0.2879	0.81921	0.85386	-0.55875	-0.78241	-0.49034	-0.72924	-0.65187	-0.68065	-0.65368	-0.68801	-0.70162	-0.61647	0.21177	0.2571	0.87965
OE6A034993	0.87787	0.81417	0.88569	0.66353	0.93168	0.60969	0.72956	0.88489	0.79438	0.47724	0.74411	0.90365	0.67385	0.85168	0.85227	-0.87029	-0.91033	-0.91317	-0.89647	-0.7395	-0.90095	-0.90363	-0.81849	-0.62022	-0.73704	0.73095	0.88037	0.62855	0.63258	0.79126	0.60456	0.31415	-0.87773	-0.62842	-0.86702	-0.86002	0.66096	0.92085	0.60133	0.84943	0.8345	0.86587	0.82514	0.80912	0.837	0.76691	-0.57715	-0.59664	-0.89246
OE6A011870	0.52304	0.4466	0.72886	0.72042	0.62543	0.72072	0.27764	0.5411	0.57009	0.53537	0.63685	0.59161	0.58652	0.54855	0.56694	-0.5414	-0.55742	-0.54518	-0.51221	-0.50409	-0.51345	-0.54677	-0.38875	-0.3405	-0.35833	0.26178	0.64298	0.24599	0.23452	0.67218	0.66122	-0.0020686	-0.49163	-0.29328	-0.51382	-0.36386	0.80489	0.54386	0.13735	0.44217	0.46928	0.64185	0.69523	0.47237	0.62793	0.49106	-0.26103	-0.28003	-0.55364
OE6A051290	0.38576	0.29333	0.53786	0.84476	0.57472	0.82797	0.054444	0.49986	0.53815	0.69679	0.70623	0.48476	0.5909	0.48218	0.53288	-0.61086	-0.5949	-0.59258	-0.56763	-0.63044	-0.51358	-0.50631	-0.44875	-0.45706	-0.4136	0.077092	0.67234	0.058082	0.025815	0.76979	0.74937	-0.10758	-0.41732	-0.10812	-0.54157	-0.39479	0.83211	0.55517	-0.10205	0.39074	0.34223	0.48155	0.53915	0.42139	0.54789	0.40648	-0.10438	-0.17068	-0.59951
OE6A013923	-0.53112	-0.52615	-0.54119	-0.29221	-0.56412	-0.19952	-0.51591	-0.38156	-0.32159	-0.046695	-0.25706	-0.51708	-0.14077	-0.56088	-0.46534	0.79774	0.69597	0.66575	0.69246	0.88694	0.52036	0.55982	0.74839	0.79865	0.83491	-0.49776	-0.4625	-0.47407	-0.47361	-0.3523	-0.18592	-0.48544	0.45029	-0.011597	0.7157	0.5566	-0.2931	-0.52542	-0.44444	-0.521	-0.46138	-0.44919	-0.41184	-0.52047	-0.44091	-0.39968	-0.073924	-0.060084	0.7087
OE6A044469	-0.4369	-0.40448	-0.45916	-0.41646	-0.5371	-0.3348	-0.33387	-0.3778	-0.27115	-0.15269	-0.30558	-0.45096	-0.13674	-0.46373	-0.42214	0.79254	0.72119	0.70474	0.66591	0.93146	0.55085	0.50137	0.67573	0.90408	0.80529	-0.32242	-0.48645	-0.26935	-0.26332	-0.44202	-0.25243	-0.28594	0.36924	-0.13138	0.63986	0.56954	-0.39041	-0.51349	-0.2324	-0.43738	-0.33797	-0.38353	-0.35392	-0.41174	-0.37401	-0.2897	-0.20676	-0.15117	0.78189
OE6A068286	-0.33896	-0.28993	-0.36842	-0.52528	-0.38253	-0.55698	-0.15013	-0.51436	-0.61888	-0.65212	-0.66383	-0.40928	-0.73	-0.38855	-0.49508	0.095038	0.1678	0.20891	0.28662	-0.16945	0.31898	0.36146	0.1331	-0.35375	-0.13112	-0.20627	-0.49497	-0.22994	-0.19906	-0.54199	-0.63857	0.060019	0.45662	0.65775	0.21354	0.22035	-0.50041	-0.42507	-0.091616	-0.3932	-0.43597	-0.43059	-0.48605	-0.42577	-0.53677	-0.55606	0.75503	0.75272	0.073608
OE6A001246	-0.15962	-0.060017	-0.33365	-0.77732	-0.32136	-0.80256	0.18508	-0.34514	-0.57315	-0.86774	-0.67978	-0.26255	-0.70295	-0.19864	-0.30312	0.14811	0.19905	0.19647	0.1737	0.022561	0.28701	0.28028	0.13834	-0.25158	-0.10129	0.16699	-0.48553	0.22146	0.22986	-0.68051	-0.80193	0.54275	0.32471	0.42919	0.2714	0.12338	-0.74138	-0.30079	0.3419	-0.12285	-0.16358	-0.36446	-0.44782	-0.22895	-0.42175	-0.23906	0.43751	0.42521	0.027233
OE6A114109	-0.038175	-0.11226	0.044962	0.4674	0.046105	0.54034	-0.28818	0.16726	0.41468	0.71067	0.49526	0.051968	0.61041	0.015924	0.11098	0.27739	0.19664	0.18381	0.13754	0.50495	0.034115	-0.04599	0.22113	0.73786	0.53648	-0.25219	0.22579	-0.2841	-0.29214	0.40205	0.59959	-0.59954	-0.14802	-0.50205	0.071057	0.17637	0.44264	0.066365	-0.36045	-0.04852	0.039266	0.13268	0.20739	0.021349	0.22855	0.11376	-0.59961	-0.6099	0.3547
OE6A073013	0.18699	0.074948	0.35713	0.81887	0.35044	0.86981	-0.18245	0.39496	0.63803	0.94513	0.77002	0.3132	0.81832	0.26468	0.36203	-0.069967	-0.13536	-0.14199	-0.16635	0.11993	-0.23129	-0.31259	-0.029156	0.40658	0.25222	-0.15221	0.53024	-0.20046	-0.21897	0.72755	0.88773	-0.57344	-0.35239	-0.50455	-0.21534	-0.044329	0.79882	0.33554	-0.33116	0.15861	0.22055	0.40445	0.49256	0.23793	0.4894	0.30397	-0.58337	-0.62469	-0.011516
OE6A074596	0.91135	0.94563	0.7697	0.32194	0.79316	0.25701	0.93402	0.80389	0.74512	0.21769	0.56353	0.864	0.57314	0.8677	0.84283	-0.65897	-0.72577	-0.72561	-0.75036	-0.43695	-0.78174	-0.83764	-0.68812	-0.36132	-0.58553	0.93632	0.71948	0.86978	0.89468	0.52511	0.35136	0.5911	-0.87557	-0.81758	-0.72866	-0.79915	0.31698	0.79684	0.89212	0.90182	0.92449	0.83437	0.79226	0.89507	0.79934	0.87235	-0.77392	-0.74825	-0.6673
OE6A024133	-0.095733	-0.17088	0.020987	0.46422	-0.0016582	0.53779	-0.34994	0.10339	0.37426	0.70923	0.46051	0.00077773	0.57499	-0.055712	0.049435	0.33018	0.2505	0.23382	0.19278	0.54183	0.085374	0.020393	0.28418	0.76775	0.58379	-0.32523	0.1755	-0.35705	-0.36474	0.37495	0.59204	-0.66329	-0.080355	-0.44369	0.14246	0.23879	0.44226	-0.0045448	-0.43405	-0.12081	-0.032084	0.11276	0.19736	-0.040542	0.19499	0.056061	-0.54434	-0.5611	0.40046
OE6A012335	0.53236	0.4429	0.63709	0.89979	0.64753	0.92346	0.18725	0.69096	0.84209	0.92876	0.93841	0.63222	0.95723	0.62715	0.70054	-0.38682	-0.46029	-0.46266	-0.4841	-0.16453	-0.52909	-0.63335	-0.3103	0.10882	-0.057874	0.23149	0.79304	0.19557	0.17591	0.8834	0.95184	-0.20385	-0.65546	-0.69232	-0.51124	-0.36454	0.8894	0.65406	0.049121	0.52925	0.57679	0.66822	0.73842	0.59005	0.74929	0.64933	-0.74181	-0.75963	-0.36501
OE6A084581	-0.83984	-0.79952	-0.81219	-0.66553	-0.83945	-0.62796	-0.67826	-0.8702	-0.91881	-0.63611	-0.82008	-0.85559	-0.84463	-0.81367	-0.84306	0.6278	0.72309	0.71625	0.70703	0.37113	0.81954	0.86721	0.65374	0.17096	0.43119	-0.69324	-0.85477	-0.58751	-0.60626	-0.79851	-0.70262	-0.165	0.92354	0.9425	0.77268	0.75518	-0.63251	-0.84426	-0.56341	-0.81009	-0.85341	-0.8776	-0.86591	-0.84742	-0.85476	-0.81783	0.89813	0.85941	0.58576
OE6A044599	-0.75012	-0.6967	-0.75229	-0.68012	-0.76273	-0.67319	-0.56557	-0.84807	-0.91711	-0.71017	-0.85372	-0.7912	-0.90739	-0.72976	-0.80159	0.47077	0.57174	0.59153	0.62463	0.16455	0.72299	0.75531	0.52426	-0.053056	0.245	-0.59185	-0.80955	-0.52315	-0.52532	-0.78522	-0.75663	-0.082562	0.84887	0.97043	0.62165	0.62983	-0.66496	-0.77523	-0.45626	-0.73755	-0.79488	-0.8197	-0.83347	-0.76439	-0.84931	-0.81442	0.9835	0.96309	0.42564
OE6A114181	-0.61671	-0.59602	-0.5859	-0.41181	-0.56235	-0.42495	-0.53003	-0.65161	-0.73011	-0.48233	-0.63294	-0.63693	-0.72953	-0.59728	-0.63356	0.21842	0.31693	0.33911	0.40965	-0.099629	0.47133	0.57036	0.27766	-0.26248	0.022779	-0.54496	-0.58127	-0.49667	-0.50526	-0.52457	-0.53371	-0.10959	0.67208	0.88554	0.37774	0.39395	-0.43108	-0.56264	-0.47471	-0.59266	-0.67943	-0.66784	-0.67743	-0.59947	-0.69285	-0.6881	0.94196	0.936	0.21663
OE6A089986	0.95079	0.9591	0.85951	0.37488	0.85723	0.32249	0.95428	0.86665	0.74605	0.2066	0.58255	0.91325	0.57412	0.88312	0.86478	-0.74326	-0.80123	-0.80666	-0.82074	-0.54725	-0.85174	-0.85795	-0.7686	-0.47488	-0.6837	0.94658	0.76483	0.88278	0.90361	0.56652	0.36964	0.59108	-0.88944	-0.77904	-0.77968	-0.84883	0.41893	0.84947	0.89755	0.91665	0.93985	0.86685	0.82282	0.87544	0.83588	0.87017	-0.71879	-0.70685	-0.74413
OE6A066812	0.72253	0.79031	0.54392	-0.084868	0.56887	-0.1642	0.91079	0.57877	0.30689	-0.30393	0.13034	0.62403	0.079941	0.66136	0.60547	-0.66583	-0.67634	-0.67368	-0.66357	-0.61298	-0.65104	-0.6106	-0.69295	-0.70634	-0.78227	0.91885	0.41143	0.93364	0.94344	0.12619	-0.1305	0.93233	-0.606	-0.38677	-0.61561	-0.76445	-0.062559	0.60968	0.96223	0.76254	0.72584	0.50512	0.4227	0.69833	0.44635	0.65682	-0.28205	-0.21766	-0.70367
OE6A060413	0.52714	0.43215	0.65603	0.82536	0.62738	0.84677	0.23269	0.68751	0.85629	0.89461	0.88051	0.62188	0.93793	0.53332	0.6333	-0.30899	-0.39571	-0.41527	-0.45193	-0.040487	-0.53718	-0.57905	-0.32344	0.23647	-0.023757	0.25281	0.72985	0.19462	0.18352	0.82517	0.9013	-0.25309	-0.6549	-0.80013	-0.45764	-0.37795	0.81977	0.60415	0.081081	0.48992	0.55834	0.70819	0.766	0.54955	0.75636	0.62143	-0.84956	-0.86931	-0.24666
OE6A018491	0.90116	0.94167	0.74248	0.18424	0.77097	0.11475	0.98713	0.77964	0.60261	0.0051551	0.42493	0.8334	0.4011	0.85308	0.80731	-0.73453	-0.77726	-0.7761	-0.78606	-0.57903	-0.79033	-0.811	-0.75391	-0.57314	-0.73311	0.99309	0.65331	0.95579	0.97378	0.40397	0.17374	0.77518	-0.8248	-0.66724	-0.74834	-0.84526	0.20349	0.79448	0.98175	0.91008	0.90767	0.74677	0.68033	0.86096	0.7052	0.83324	-0.59499	-0.55462	-0.76409
OE6A048706	0.80421	0.77975	0.77028	0.65979	0.78264	0.63703	0.63224	0.78681	0.91322	0.65527	0.8214	0.82789	0.86402	0.81476	0.82104	-0.51859	-0.59995	-0.59634	-0.63625	-0.24156	-0.68499	-0.80724	-0.52079	-0.016212	-0.28444	0.63602	0.81995	0.53171	0.55537	0.77354	0.726	0.096073	-0.85608	-0.90359	-0.66487	-0.59365	0.65346	0.76144	0.51479	0.75548	0.8208	0.86005	0.87363	0.79434	0.87939	0.79792	-0.91702	-0.92233	-0.48054
OE6A030845	-0.82288	-0.78245	-0.78153	-0.62736	-0.8299	-0.59766	-0.68414	-0.9147	-0.86408	-0.57527	-0.80747	-0.85051	-0.80415	-0.78207	-0.86472	0.62522	0.71541	0.75305	0.77549	0.36782	0.84237	0.79813	0.65715	0.24052	0.46536	-0.71278	-0.83869	-0.65681	-0.64964	-0.76299	-0.65181	-0.2982	0.86616	0.86242	0.67798	0.79396	-0.60395	-0.85621	-0.58566	-0.84283	-0.84856	-0.83693	-0.82947	-0.82434	-0.86285	-0.87367	0.86157	0.8719	0.63354
Hydroxytyrosol	0.97715	0.95486	0.91261	0.64266	0.96877	0.57292	0.86143	0.95952	0.90096	0.49637	0.80352	0.97756	0.76057	0.96468	0.97168	-0.88323	-0.93487	-0.93601	-0.94223	-0.69105	-0.96047	-0.98005	-0.87345	-0.54605	-0.74872	0.87929	0.93564	0.8033	0.80958	0.80523	0.62459	0.48081	-0.98737	-0.80288	-0.92681	-0.94028	0.6152	0.98076	0.75691	0.98211	0.97335	0.93749	0.90806	0.98115	0.93051	0.94194	-0.7507	-0.73829	-0.86567
Tyrosol	0.092133	0.16806	-0.01482	-0.48852	-0.014195	-0.55829	0.35651	-0.11618	-0.37589	-0.72668	-0.4833	-0.012633	-0.58237	0.03484	-0.072878	-0.30528	-0.22981	-0.20855	-0.15687	-0.5098	-0.080227	-0.005972	-0.28276	-0.72286	-0.5675	0.32465	-0.19649	0.35034	0.36607	-0.39798	-0.61113	0.63619	0.076259	0.40137	-0.13993	-0.22704	-0.45365	-0.016932	0.44104	0.098724	0.026086	-0.11508	-0.1996	0.02649	-0.20672	-0.075044	0.52104	0.5705	-0.34744
Oleuropein	0.69191	0.63961	0.71298	0.68625	0.70992	0.68297	0.49368	0.78458	0.90078	0.74418	0.84615	0.74042	0.91162	0.683	0.75452	-0.39041	-0.4965	-0.51208	-0.54537	-0.081186	-0.64634	-0.70982	-0.42545	0.14613	-0.14195	0.51833	0.76966	0.44988	0.45239	0.77108	0.77776	0.0056816	-0.79975	-0.95283	-0.55386	-0.54071	0.66267	0.71033	0.38066	0.67373	0.74012	0.79714	0.82187	0.72201	0.81653	0.77238	-0.97857	-0.95957	-0.35826
Ligstroside	0.9474	0.89746	0.93738	0.77535	0.98084	0.72246	0.76052	0.97527	0.96612	0.65545	0.90447	0.97741	0.87222	0.94707	0.97269	-0.84648	-0.90383	-0.90669	-0.91905	-0.63498	-0.94333	-0.97472	-0.82796	-0.4388	-0.65731	0.77994	0.98081	0.699	0.69988	0.90294	0.76778	0.32107	-0.98598	-0.83406	-0.91166	-0.88211	0.75365	0.98264	0.62805	0.93951	0.94487	0.96035	0.95044	0.95043	0.96927	0.9292	-0.80216	-0.80644	-0.81617
p-Cumaric acid	0.87707	0.80821	0.89885	0.81161	0.94615	0.76018	0.66383	0.93745	0.96478	0.73165	0.91726	0.92522	0.89203	0.87341	0.91326	-0.78862	-0.85221	-0.85658	-0.86639	-0.5714	-0.90121	-0.93769	-0.772	-0.36025	-0.57867	0.68513	0.95507	0.59174	0.58866	0.92104	0.81426	0.19798	-0.95131	-0.8289	-0.86884	-0.83263	0.76288	0.9437	0.51622	0.87021	0.87548	0.93629	0.92594	0.89439	0.93	0.86723	-0.80943	-0.81758	-0.76432
o-Cumaric acid	0.62115	0.67843	0.46205	-0.13542	0.43744	-0.17912	0.80528	0.44306	0.36302	-0.19832	0.10677	0.5311	0.1662	0.51631	0.44007	-0.3304	-0.37577	-0.36786	-0.39757	-0.15793	-0.43815	-0.49123	-0.44162	-0.15995	-0.38086	0.77433	0.29456	0.70161	0.74875	0.07375	-0.086542	0.52211	-0.55586	-0.60939	-0.42153	-0.49897	-0.093071	0.42493	0.82959	0.56514	0.62214	0.5011	0.42483	0.5241	0.42695	0.49453	-0.55497	-0.50088	-0.31193
Catechin	0.76356	0.80931	0.62123	-0.022074	0.63583	-0.10513	0.93518	0.62665	0.3776	-0.23143	0.18752	0.67921	0.14511	0.6872	0.62995	-0.69779	-0.71327	-0.71011	-0.70496	-0.62329	-0.69161	-0.67124	-0.72818	-0.69046	-0.79147	0.93724	0.46038	0.92909	0.93869	0.19201	-0.058937	0.87803	-0.66623	-0.45057	-0.6661	-0.7954	-0.0093167	0.66023	0.96349	0.78781	0.7597	0.58502	0.49239	0.72654	0.49933	0.67661	-0.35342	-0.29508	-0.74078
Apigenin-7-O-glucoside	0.67617	0.75003	0.48117	-0.18361	0.49154	-0.25565	0.89901	0.46553	0.28285	-0.34351	0.039985	0.57082	0.030788	0.56287	0.48197	-0.49674	-0.5248	-0.52533	-0.52961	-0.4013	-0.53469	-0.52937	-0.55723	-0.49558	-0.6106	0.86487	0.31119	0.7964	0.83896	0.04556	-0.1996	0.71305	-0.54967	-0.44291	-0.47956	-0.63752	-0.15301	0.48263	0.92832	0.64354	0.64605	0.50571	0.41013	0.56793	0.4153	0.51596	-0.36392	-0.33101	-0.53943
Apigenine	0.68211	0.75477	0.49592	-0.19193	0.49893	-0.26261	0.91381	0.50851	0.28146	-0.35497	0.053786	0.57663	0.046856	0.58484	0.51795	-0.51486	-0.54388	-0.5443	-0.54887	-0.41607	-0.55587	-0.54563	-0.57662	-0.515	-0.63245	0.90325	0.31886	0.88508	0.90988	0.036354	-0.19899	0.83756	-0.56921	-0.4603	-0.50382	-0.66881	-0.16478	0.51748	0.96909	0.68832	0.68372	0.4934	0.39944	0.61994	0.40587	0.58591	-0.37567	-0.31552	-0.5632
Caffeic acid	0.75319	0.79451	0.61812	0.043101	0.58939	0.009707	0.8775	0.66427	0.53012	-0.031302	0.32468	0.68559	0.37841	0.66116	0.64584	-0.41384	-0.49759	-0.50923	-0.52946	-0.18434	-0.60375	-0.62255	-0.49143	-0.18604	-0.40508	0.87778	0.47637	0.85069	0.87289	0.25243	0.10081	0.62363	-0.70371	-0.77681	-0.49139	-0.63782	0.08386	0.60468	0.89756	0.74069	0.78914	0.65086	0.59456	0.69879	0.59188	0.73012	-0.73119	-0.66863	-0.45164
Verbascoside	0.84997	0.7742	0.89537	0.89461	0.94851	0.8431	0.5887	0.90783	0.94865	0.77901	0.94135	0.90939	0.88586	0.86809	0.90456	-0.84122	-0.88554	-0.88525	-0.88423	-0.67264	-0.89884	-0.92524	-0.7885	-0.44801	-0.62243	0.60455	0.97971	0.50691	0.50376	0.97151	0.86348	0.13027	-0.91105	-0.71449	-0.88808	-0.81198	0.85439	0.93496	0.41896	0.8332	0.82555	0.91578	0.92086	0.86082	0.92968	0.82063	-0.68885	-0.71473	-0.80335
Diosmetin	0.68399	0.75986	0.49287	-0.19158	0.49721	-0.262	0.91516	0.51069	0.2822	-0.3553	0.05719	0.5771	0.049616	0.59122	0.52546	-0.51553	-0.54458	-0.54495	-0.54957	-0.41664	-0.55669	-0.54582	-0.57582	-0.51599	-0.63264	0.90683	0.32159	0.89363	0.91778	0.036423	-0.19834	0.85036	-0.56989	-0.46101	-0.50373	-0.66983	-0.16397	0.519	0.97332	0.69419	0.68866	0.49052	0.39925	0.62746	0.40804	0.59562	-0.37587	-0.31346	-0.56279
Vanillic acid	0.69082	0.7628	0.5047	-0.18096	0.50858	-0.25203	0.91869	0.51633	0.29212	-0.34503	0.064162	0.58608	0.056559	0.59346	0.52646	-0.52266	-0.55211	-0.55254	-0.55718	-0.42212	-0.56423	-0.55456	-0.58359	-0.51804	-0.63728	0.9073	0.32949	0.88602	0.91158	0.047861	-0.18871	0.83263	-0.57789	-0.46722	-0.51188	-0.67536	-0.15379	0.52581	0.97092	0.6951	0.69085	0.50362	0.41005	0.6268	0.41678	0.59188	-0.38273	-0.32419	-0.57007
Rutin	0.981	0.9558	0.92307	0.62492	0.96462	0.56148	0.87438	0.96157	0.91117	0.49318	0.79734	0.98174	0.77114	0.94946	0.95875	-0.83876	-0.90161	-0.90619	-0.91585	-0.62367	-0.94811	-0.97003	-0.84147	-0.47914	-0.70035	0.88505	0.92253	0.79831	0.80881	0.79319	0.61974	0.44612	-0.99096	-0.85097	-0.89549	-0.92132	0.6066	0.96684	0.76774	0.97021	0.97567	0.9562	0.92402	0.96416	0.93808	0.9354	-0.80483	-0.7959	-0.82757
Luteolin	0.50085	0.59378	0.30886	-0.39633	0.30383	-0.46824	0.79831	0.29759	0.034827	-0.57447	-0.18272	0.37809	-0.20442	0.40604	0.32228	-0.40285	-0.40595	-0.40288	-0.3967	-0.3838	-0.38055	-0.35388	-0.45313	-0.55116	-0.59141	0.78386	0.10313	0.79613	0.81829	-0.18863	-0.42276	0.87791	-0.3572	-0.21482	-0.34643	-0.52528	-0.36438	0.32397	0.89158	0.51885	0.49659	0.28276	0.18345	0.4435	0.18398	0.40066	-0.12064	-0.049703	-0.46718
Luteolin-4-O-glucoside	0.98117	0.95769	0.91896	0.61234	0.96379	0.54793	0.87887	0.95958	0.89474	0.47152	0.78742	0.97926	0.75643	0.96266	0.96392	-0.85265	-0.91297	-0.91268	-0.91788	-0.64773	-0.94449	-0.97968	-0.84218	-0.51016	-0.71459	0.89539	0.9202	0.81759	0.82544	0.78217	0.60446	0.48322	-0.99094	-0.83116	-0.90797	-0.92336	0.59284	0.97407	0.78184	0.97952	0.98145	0.94256	0.90749	0.97313	0.92174	0.93984	-0.78052	-0.76345	-0.85167
Luteolin-7-O-glucoside	0.93207	0.94566	0.83993	0.38633	0.86149	0.31658	0.92882	0.86743	0.69423	0.18433	0.58198	0.89293	0.53148	0.91163	0.89769	-0.8283	-0.88099	-0.87835	-0.85419	-0.68671	-0.88121	-0.88904	-0.7878	-0.65393	-0.77136	0.95092	0.7767	0.93065	0.93307	0.56859	0.35535	0.72893	-0.88567	-0.6784	-0.82372	-0.90187	0.38946	0.88873	0.89364	0.95775	0.94099	0.82207	0.77629	0.93449	0.77497	0.90848	-0.5921	-0.52613	-0.88204
Totals (oleuropein derivates)	0.97437	0.93939	0.93642	0.68482	0.97588	0.62717	0.83677	0.97759	0.9368	0.55555	0.84547	0.98629	0.81866	0.9603	0.97555	-0.84733	-0.90681	-0.90973	-0.92297	-0.6317	-0.94957	-0.97886	-0.84237	-0.4635	-0.68771	0.8547	0.95115	0.77955	0.78365	0.83711	0.68118	0.42062	-0.99629	-0.85079	-0.91118	-0.90908	0.66903	0.98244	0.72498	0.96956	0.97615	0.95837	0.93609	0.97061	0.95486	0.94916	-0.81006	-0.80249	-0.82584
Anthocyanin	0.72092	0.8027	0.5216	-0.078714	0.54781	-0.16019	0.90034	0.4874	0.31895	-0.28781	0.10588	0.62038	0.05866	0.63398	0.55011	-0.60867	-0.61431	-0.61488	-0.62069	-0.55095	-0.5889	-0.56998	-0.63289	-0.63043	-0.71549	0.86065	0.39173	0.79052	0.83427	0.13174	-0.13005	0.72257	-0.56288	-0.36131	-0.54481	-0.6785	-0.041385	0.52751	0.90484	0.6854	0.66808	0.54298	0.46763	0.61394	0.48937	0.55251	-0.28089	-0.27522	-0.63274
[truncated: 60 more columns]

## Sheet: Table S8
Table S8. Correlation analysis according to the threshold of PCC > |0.90| between 10 DAMs and 93 significant DEGs (Table S4 'Ruveia' vs. 'Salella' comparison)
	OE6A012821	OE6A071307	OE6A103537	OE6A035887	OE6A080272	OE6A004297	OE6A114109	OE6A015647	OE6A076354	OE6A010456	OE6A028974	OE6A092384	OE6A065557	OE6A066649	OE6A114181	OE6A012335	OE6A050501	OE6A001158	OE6A029393	OE6A105055	OE6A054446	OE6A086983	OE6A051654	OE6A074596	OE6A078915	OE6A007397	OE6A084581	OE6A018659	OE6A089246	OE6A092574	OE6A109185	OE6A011825	OE6A082229	OE6A049944	OE6A074408	OE6A095147	OE6A081156	OE6A053999	OE6A108606	OE6A068581	OE6A113723	OE6A104547	OE6A055813	OE6A117416	OE6A078092	OE6A077716	OE6A115934	OE6A057230	OE6A048706
OE6A012821		3.9213e-06	0.00074046	0.00011031	3.9432e-05	8.9605e-05	0.00097387	2.0735e-06	1.8045e-06	0.93097	5.6751e-06	7.1409e-05	0.001402	0.00030382	0.37088	0.010515	1.39e-06	0.0024359	2.2201e-07	4.8244e-06	1.6651e-05	3.4814e-05	2.0409e-06	0.0010604	6.8814e-05	0.00064974	4.1839e-06	0.014265	0.0018974	1.2076e-05	2.1032e-05	0.00013095	4.5675e-08	0.0037734	1.1403e-05	3.8179e-05	0.010178	4.7106e-06	0.032549	0.00060916	6.7893e-06	0.0047061	1.2042e-05	3.1545e-07	2.737e-06	4.3548e-09	7.4004e-07	2.655e-05	0.0015735
OE6A071307	0.94407		0.0094397	9.3247e-05	3.6654e-06	2.1759e-08	7.7283e-05	5.9456e-06	2.5832e-06	0.792	7.8209e-06	4.2391e-07	0.00032097	1.5786e-05	0.3664	0.002995	7.2439e-07	0.00056829	6.6921e-07	2.4454e-05	0.00010776	8.2131e-05	8.2124e-05	0.00058322	8.6817e-05	0.00081179	6.4705e-06	0.015375	0.0015443	1.809e-05	3.1266e-05	0.00015989	4.3771e-06	0.0018232	1.2891e-06	0.00026957	0.0026411	0.00036511	0.023713	0.0016578	7.1269e-06	0.0030846	1.2093e-05	7.6849e-07	1.408e-07	7.0871e-06	2.1328e-07	1.5297e-05	1.1191e-05
OE6A103537	0.83426	0.71164		0.075703	0.054403	0.036968	0.010835	0.019323	0.0040014	0.84735	0.0089124	0.031981	0.0067937	0.065372	0.43553	0.016061	0.010319	0.030676	0.0016309	0.012056	0.025016	0.0058594	0.011777	0.034332	0.019324	0.036576	0.011967	0.10116	0.029293	0.014645	0.016556	0.0024829	0.0068428	0.039795	0.027555	0.020901	0.018114	0.01135	0.081385	0.050346	0.015257	0.044111	0.011321	0.010068	0.02284	0.0015061	0.0068773	0.034246	0.074953
OE6A035887	0.8889	0.89272	0.53095		8.5127e-07	0.00015601	0.025128	6.5535e-07	0.0006414	0.86784	0.00064786	0.00014526	0.0498	0.00012824	0.30111	0.12989	9.454e-06	0.02153	0.00051373	5.7983e-05	4.047e-07	0.001247	4.7009e-05	0.0024318	0.00017056	0.00095955	3.775e-05	0.017264	0.00819	4.8102e-05	8.2308e-05	0.020811	4.0999e-06	0.00297	1.6341e-08	0.00019881	0.14763	2.5074e-06	0.08723	0.00010839	1.7204e-05	0.018647	0.00022795	7.0972e-06	5.5765e-06	0.0002429	0.00027642	1.2641e-06	0.0013606
OE6A080272	0.91023	0.94484	0.56728	0.959		2.7159e-06	0.0024074	7.5679e-07	7.618e-05	0.89859	3.824e-05	1.7229e-06	0.0084807	4.3333e-06	0.29375	0.026826	1.1226e-06	0.00224	6.1452e-05	7.7309e-05	2.7377e-05	0.00073981	2.6883e-05	0.0036535	0.00036723	0.0018511	8.9744e-06	0.028588	0.0091521	8.213e-05	0.00014867	0.0045587	7.7866e-06	0.0028371	1.632e-07	0.00038817	0.030265	7.5448e-05	0.031538	0.00083491	2.6876e-05	0.0064409	0.00011775	1.6541e-06	3.0325e-07	0.00011002	2.4667e-05	3.825e-09	5.6013e-05
OE6A004297	0.8936	0.98045	0.60543	0.88058	0.94811		7.3154e-05	9.23e-06	1.1725e-05	0.98639	7.7254e-06	6.1121e-09	0.00039789	5.19e-07	0.29364	0.002593	1.7789e-06	0.00014339	6.2493e-06	0.00030245	0.00035748	0.00076072	0.00021844	0.0034414	0.00086613	0.0035894	1.1469e-05	0.040055	0.006649	0.00020674	0.00038709	0.00047144	5.6593e-05	0.0031805	6.3581e-06	0.00070303	0.0029853	0.0009843	0.012156	0.0035467	0.0001028	0.0013557	6.8768e-05	3.5004e-06	3.3314e-06	7.4371e-05	6.4233e-06	2.9635e-05	3.9012e-07
OE6A114109	0.8243	0.89682	0.70257	0.63955	0.78656	0.89799		0.0026485	2.1342e-05	0.94704	3.1807e-05	5.8668e-05	7.3819e-09	0.00034198	0.3067	9.6351e-07	0.00067476	3.2805e-06	3.2443e-05	0.0051713	0.019065	0.0028426	0.004316	0.022524	0.014643	0.034026	0.0007336	0.14649	0.023459	0.006406	0.0086919	4.9822e-06	0.0023317	0.05288	0.0050838	0.0044429	8.0565e-07	0.026081	0.0037533	0.064546	0.0045812	0.0021518	0.0020715	0.0007115	0.0011502	0.0004206	5.2726e-05	0.0045608	7.6832e-05
OE6A015647	0.95088	0.93912	0.66076	0.96112	0.95997	0.93339	0.78209		5.9235e-06	0.6436	2.6866e-06	1.7993e-06	0.006265	2.2392e-06	0.16441	0.021665	9.2877e-10	0.0015532	2.2552e-06	5.7652e-05	1.2003e-06	0.00052494	4.7821e-06	0.0053321	0.00054008	0.0032379	5.3181e-08	0.047871	0.0092166	8.6608e-05	0.00019271	0.0020232	6.6282e-08	0.0042576	4.6116e-08	2.52e-05	0.035808	4.7917e-07	0.012932	0.00058887	2.0678e-05	0.0032905	9.8169e-05	1.5856e-09	2.8482e-06	1.7533e-06	1.0541e-05	2.2482e-06	0.00018517
OE6A076354	0.95225	0.94863	0.76157	0.83924	0.89713	0.93004	0.92089	0.93916		0.79978	2.4341e-08	2.2682e-06	8.091e-05	9.9319e-06	0.2106	0.0013136	1.4199e-06	9.2267e-05	1.1403e-08	7.5325e-05	0.00032876	8.0527e-05	2.08e-05	0.0046353	0.0010782	0.0043711	6.4329e-07	0.058523	0.012219	0.00016933	0.0003779	1.3155e-05	1.9422e-06	0.023873	7.2377e-05	1.0006e-05	0.0015598	0.00026047	0.0041782	0.0051182	4.7462e-05	0.00065163	6.8471e-05	2.8639e-07	1.7996e-05	5.6452e-08	7.2843e-08	0.00010626	0.00014264
OE6A010456	0.02808	0.085344	0.062351	-0.053912	-0.041303	0.0055315	0.021533	-0.14916	-0.082093		0.65361	0.66878	0.74977	0.4707	0.0028387	0.8799	0.66662	0.50197	0.79757	0.54781	0.92434	0.56902	0.95984	0.10379	0.26196	0.14977	0.5607	0.021079	0.088265	0.40439	0.34334	0.64373	0.97405	0.61795	0.91037	0.93	0.55134	0.67829	0.039537	0.61893	0.66812	0.53253	0.50884	0.77611	0.6701	0.95701	0.76545	0.89723	0.70036
OE6A028974	0.93969	0.93561	0.71533	0.83889	0.91079	0.93577	0.91412	0.94822	0.98	-0.14472		5.1786e-07	0.00011643	3.1896e-06	0.17351	0.00075785	6.8366e-07	3.2598e-05	1.8029e-08	0.00038537	0.00049316	0.00052092	5.321e-05	0.01313	0.0032338	0.012712	1.146e-06	0.10862	0.014333	0.00073497	0.001306	3.2164e-05	1.2034e-05	0.015758	9.8172e-05	0.00011604	0.001875	0.00027261	0.0020964	0.0095712	0.00025101	0.0015628	0.00039153	9.0751e-07	3.4565e-05	7.1285e-07	9.0552e-07	0.00011451	8.4554e-05
OE6A092384	0.8985	0.9644	0.61867	0.88235	0.95269	0.98486	0.90254	0.95228	0.94997	-0.13804	0.96293		0.00052495	1.0005e-09	0.13148	0.001668	1.0176e-07	2.7106e-05	1.2339e-06	0.00064155	0.00032879	0.001419	0.00017761	0.012109	0.0030636	0.011778	1.1162e-06	0.10142	0.017557	0.0007166	0.0013871	0.00069641	3.5234e-05	0.0070449	7.0474e-06	0.00043899	0.0043333	0.00058629	0.0025879	0.0067496	0.00025295	0.0011391	0.00032886	8.5021e-07	1.4797e-05	4.1945e-05	8.71e-06	1.6154e-05	6.5347e-08
OE6A065557	0.81005	0.8611	0.73204	0.57639	0.71847	0.85467	0.98427	0.73682	0.89583	0.10313	0.88765	0.84592		0.002061	0.46017	1.0342e-06	0.0022109	3.1654e-05	9.3382e-05	0.007336	0.029762	0.0038149	0.0072351	0.021178	0.016333	0.033565	0.0024526	0.12159	0.015132	0.0078268	0.010308	1.8073e-07	0.004237	0.069538	0.012944	0.0060444	2.3742e-08	0.037248	0.010997	0.072362	0.0079317	0.004176	0.0023876	0.001955	0.00262	0.00051525	0.00011136	0.013944	0.00089717
OE6A066649	0.86269	0.92564	0.54754	0.88536	0.94292	0.96292	0.85924	0.9501	0.93238	-0.23068	0.94638	0.98947	0.79362		0.082555	0.0049763	5.8062e-07	5.1815e-05	1.6023e-05	0.0014951	0.00042656	0.0034902	0.00023088	0.02536	0.0072232	0.02061	1.9882e-06	0.15638	0.04249	0.0016308	0.0034715	0.0025329	7.8379e-05	0.016033	1.8179e-05	0.00035425	0.012579	0.00060296	0.0016553	0.0081215	0.0006161	0.00085717	0.00083608	2.6422e-06	7.7001e-05	0.00013784	6.472e-05	2.5127e-05	6.3117e-07
OE6A114181	-0.28407	-0.28663	-0.2488	-0.32598	-0.3307	-0.33077	-0.32244	-0.42866	-0.38961	0.77878	-0.42048	-0.46097	-0.23604	-0.52078		0.22082	0.11613	0.093649	0.18379	0.83513	0.34615	0.85615	0.48586	0.59051	0.86825	0.644	0.1707	0.21105	0.79866	0.75935	0.98652	0.6498	0.31078	0.52928	0.2506	0.34734	0.69662	0.24711	0.0086928	0.71296	0.6774	0.34979	0.79619	0.22437	0.57993	0.30973	0.44065	0.24725	0.11102
OE6A012335	0.70457	0.77619	0.67483	0.46266	0.63402	0.78309	0.95796	0.65171	0.81269	-0.048961	0.83344	0.80282	0.95735	0.74987	-0.3817		0.0073914	1.5312e-05	0.0007669	0.054405	0.091511	0.035312	0.041294	0.13198	0.10317	0.19926	0.0089212	0.44772	0.061877	0.063952	0.075181	0.0001621	0.024887	0.11578	0.040998	0.040246	1.836e-06	0.10666	0.0026646	0.25021	0.053888	0.015166	0.029461	0.010531	0.019511	0.0057009	0.0025407	0.043731	0.00108
OE6A050501	0.95471	0.96032	0.70582	0.93306	0.95664	0.95239	0.8375	0.98963	0.95452	-0.13899	0.96079	0.97332	0.79046	0.96206	-0.47786	0.72697		0.00041053	1.3202e-07	0.00015243	1.2723e-05	0.00066528	2.3958e-05	0.0068839	0.00097351	0.0051354	1.1947e-07	0.063398	0.0082706	0.00012715	0.00039115	0.0010666	3.8654e-07	0.002761	1.3712e-07	8.0734e-05	0.016439	8.7962e-06	0.0070884	0.0013637	5.4007e-05	0.0030682	0.00013761	6.4207e-09	5.0966e-06	1.5672e-06	4.9956e-06	1.9781e-06	2.8886e-05
OE6A001158	0.78601	0.84331	0.62238	0.65221	0.78987	0.88267	0.94607	0.80583	0.89295	-0.21511	0.91368	0.9169	0.9142	0.90502	-0.50548	0.92611	0.85371		6.4488e-05	0.018451	0.013636	0.02452	0.0049665	0.11096	0.052784	0.11247	0.00038626	0.36518	0.075553	0.023836	0.032765	0.00040418	0.0035513	0.09234	0.0057977	0.0052952	0.0003233	0.018753	0.00037274	0.065266	0.018596	0.00086172	0.0052806	0.00058739	0.0036631	0.00090433	0.00050722	0.004858	2.5116e-05
OE6A029393	0.96877	0.96096	0.80378	0.84662	0.9016	0.93849	0.91377	0.95003	0.98283	-0.083017	0.98118	0.9558	0.89268	0.92542	-0.41154	0.83302	0.97188	0.90062		0.00015936	0.00014656	0.00030059	4.8569e-05	0.0063214	0.0011599	0.0064474	5.3265e-07	0.063376	0.0059166	0.00027366	0.00046754	2.3168e-05	2.2217e-06	0.0083058	3.157e-05	9.2958e-05	0.0018641	0.00012384	0.0044419	0.0039547	0.00011972	0.0015434	8.6369e-05	1.7231e-07	1.8886e-05	2.8118e-08	3.1599e-07	0.00011099	7.9829e-05
OE6A105055	-0.94166	-0.91865	-0.69532	-0.90278	-0.89681	-0.86283	-0.74774	-0.9029	-0.89737	-0.19302	-0.85565	-0.83923	-0.72743	-0.80741	0.067399	-0.56727	-0.88116	-0.66434	-0.88005		2.162e-05	1.1934e-06	1.3148e-06	7.8738e-06	6.4921e-08	5.4453e-06	5.1705e-05	0.00089964	0.0012251	5.3121e-07	2.9898e-09	0.00083076	9.6789e-07	0.01281	2.564e-05	1.4894e-05	0.025503	8.2128e-05	0.12946	0.00034606	9.2954e-09	0.0061172	1.1075e-06	9.3647e-06	2.2347e-07	1.1491e-05	5.2523e-06	9.8954e-05	0.0050618
OE6A054446	-0.92482	-0.88944	-0.63992	-0.96474	-0.91673	-0.85792	-0.66181	-0.95604	-0.8604	0.030783	-0.84794	-0.8604	-0.62504	-0.85253	0.2984	-0.50833	-0.92886	-0.68671	-0.88213	0.92068		0.0015706	1.8549e-05	0.0022444	7.539e-05	0.00085146	1.4085e-05	0.011156	0.0030653	5.6266e-05	3.4933e-05	0.0087083	2.9399e-07	0.009663	9.4129e-07	3.0418e-05	0.10631	3.395e-07	0.093075	1.2031e-05	4.4316e-05	0.012348	2.6e-05	1.6064e-06	8.7987e-06	2.5234e-05	0.00011	4.3727e-05	0.0026025
OE6A086983	-0.91251	-0.89551	-0.74069	-0.81476	-0.83429	-0.83331	-0.77872	-0.84592	-0.89593	-0.18307	-0.84617	-0.80956	-0.76405	-0.76859	0.058723	-0.60967	-0.83798	-0.64159	-0.863	0.95609	0.80536		5.6298e-05	3.3161e-05	2.1592e-05	7.1762e-05	0.00031254	0.0042221	0.0072577	1.7996e-05	8.096e-06	0.00039533	6.664e-05	0.011842	0.00036048	0.00032174	0.012123	0.00093014	0.085699	0.0061827	1.4888e-07	0.0059419	0.00011362	0.00016776	3.6603e-05	7.3404e-05	3.9838e-05	0.00060764	0.0094238
OE6A051654	-0.95104	-0.89551	-0.69693	-0.90691	-0.91704	-0.87188	-0.75758	-0.94176	-0.92131	0.016325	-0.90449	-0.8773	-0.72827	-0.87038	0.22307	-0.59494	-0.91899	-0.74998	-0.90628	0.95522	0.92314	0.90337		0.00127	0.00011944	0.00050833	2.2372e-06	0.013863	0.011384	4.6441e-05	3.3737e-05	0.0011812	1.055e-06	0.017295	3.0202e-05	7.2951e-06	0.031238	7.0366e-06	0.035681	0.0009419	6.8291e-06	0.00068609	1.0714e-05	6.6008e-07	5.2784e-06	3.8391e-06	2.1232e-05	2.6275e-05	0.0031447
OE6A074596	-0.82108	-0.84244	-0.61225	-0.78609	-0.76627	-0.7693	-0.64857	-0.74603	-0.75375	-0.49253	-0.68938	-0.69502	-0.65353	-0.63878	-0.17313	-0.46045	-0.73126	-0.48387	-0.73629	0.93552	0.78978	0.91338	0.81404		1.1099e-07	6.812e-08	0.0070718	7.4641e-06	0.0002102	6.234e-06	4.5046e-07	0.004611	0.0008211	0.011255	0.001409	0.0021416	0.040328	0.005984	0.50334	0.0020089	1.8179e-05	0.049062	8.6093e-05	0.0025418	0.0001101	0.001933	0.00057265	0.0038517	0.029487
OE6A078915	-0.89927	-0.8943	-0.66076	-0.87834	-0.85711	-0.82864	-0.6816	-0.84499	-0.82044	-0.3519	-0.77242	-0.77508	-0.67358	-0.72837	-0.053743	-0.49329	-0.82431	-0.57042	-0.81761	0.97563	0.89735	0.9207	0.88705	0.97285		2.423e-08	0.0010126	2.8116e-05	0.00015434	1.3033e-07	9.3564e-13	0.0027458	3.2274e-05	0.0064968	9.811e-05	0.00033201	0.041973	0.00046041	0.33854	8.2532e-05	6.463e-07	0.026872	1.9965e-06	0.00021621	2.806e-06	0.0002056	7.2018e-05	0.00041602	0.011885
OE6A007397	-0.8388	-0.83099	-0.60642	-0.82486	-0.79835	-0.76717	-0.61307	-0.77235	-0.7569	-0.44246	-0.69165	-0.69692	-0.61431	-0.6557	-0.14898	-0.39866	-0.74813	-0.48209	-0.73514	0.9402	0.82926	0.89839	0.84696	0.9754	0.98002		0.0060699	1.5637e-06	0.0006103	5.2666e-07	1.1902e-07	0.0073408	0.00040476	0.011453	0.00088883	0.0011166	0.068584	0.0021357	0.54603	0.00014931	1.2186e-05	0.04034	1.5582e-05	0.0017523	7.7817e-05	0.0014719	0.00064627	0.0013348	0.034978
OE6A084581	-0.94333	-0.93805	-0.69583	-0.91103	-0.93377	-0.93036	-0.83459	-0.9766	-0.96127	0.18695	-0.95645	-0.95669	-0.7857	-0.9513	0.42297	-0.71527	-0.97244	-0.85558	-0.96272	0.90506	0.92736	0.86188	0.95011	0.72964	0.82283	0.73865		0.069153	0.020426	0.00043119	0.00037178	0.00084393	7.1574e-07	0.015946	2.9026e-06	2.0961e-05	0.016441	1.7001e-05	0.0034487	0.0028404	3.8908e-05	0.00032952	9.1242e-05	4.9961e-10	1.0424e-05	1.3894e-06	8.4459e-06	3.172e-05	9.6983e-05
OE6A018659	-0.68349	-0.67805	-0.49581	-0.66941	-0.62855	-0.59786	-0.44567	-0.58039	-0.55956	-0.65391	-0.48665	-0.49548	-0.47169	-0.43613	-0.38925	-0.24244	-0.55091	-0.28733	-0.55095	0.82725	0.70061	0.75875	0.68554	0.93622	0.91627	0.95362	0.54127		0.00058887	0.00040883	0.00010433	0.041251	0.012399	0.041814	0.018771	0.019992	0.16291	0.02989	0.81883	0.0013459	0.0022675	0.18439	0.00089478	0.031456	0.0037579	0.024344	0.013203	0.026546	0.16819
OE6A089246	-0.79727	-0.80606	-0.62643	-0.72066	-0.71363	-0.73332	-0.64525	-0.71318	-0.6944	-0.51275	-0.68315	-0.66814	-0.67921	-0.59217	-0.08256	-0.55356	-0.72005	-0.53118	-0.74013	0.81547	0.77505	0.72808	0.69924	0.8729	0.88085	0.84092	0.65641	0.84212		0.00033519	0.00022893	0.0045248	0.0024261	0.0085773	0.0046991	0.0094294	0.030465	0.011875	0.61523	0.0028204	0.0029165	0.21571	0.00099177	0.0065522	0.00073495	0.002791	0.0010507	0.012629	0.030151
OE6A092574	-0.92962	-0.92353	-0.68159	-0.90647	-0.89551	-0.87334	-0.73551	-0.89435	-0.87852	-0.26543	-0.83452	-0.83541	-0.72347	-0.80378	0.099073	-0.54996	-0.88557	-0.64393	-0.86568	0.96274	0.90338	0.92362	0.90714	0.93852	0.97196	0.96281	0.85219	0.85384	0.85983		3.0875e-08	0.0013317	3.1426e-06	0.0035307	2.0047e-05	5.9627e-05	0.028541	0.00012937	0.20952	4.841e-05	2.2078e-07	0.019594	1.728e-06	4.5561e-05	7.7844e-07	3.4818e-05	1.0344e-05	3.9371e-05	0.0047805
OE6A109185	-0.92113	-0.91442	-0.67256	-0.89546	-0.88178	-0.85552	-0.71692	-0.87519	-0.85624	-0.30006	-0.81292	-0.81049	-0.70589	-0.76887	-0.0054792	-0.53175	-0.8552	-0.61649	-0.84964	0.98688	0.91244	0.93515	0.91307	0.96396	0.9974	0.97247	0.85674	0.89018	0.87061	0.97902		0.0014432	7.1674e-06	0.0066648	3.9667e-05	0.00011119	0.0309	0.00021745	0.24689	8.191e-05	8.1035e-08	0.016734	5.6426e-07	6.2316e-05	4.1455e-07	6.1543e-05	1.794e-05	0.0001847	0.0071682
OE6A011825	0.88486	0.87997	0.78513	0.65493	0.75465	0.84938	0.94127	0.79444	0.92837	0.1491	0.91392	0.8364	0.97004	0.78419	-0.14641	0.87962	0.82086	0.85419	0.91954	-0.83015	-0.7168	-0.85487	-0.8169	-0.75403	-0.78038	-0.72739	-0.82958	-0.59504	-0.75505	-0.81214	-0.80887		0.00063352	0.054795	0.0057304	0.00088085	1.2662e-05	0.0095346	0.026552	0.024888	0.0012842	0.0043537	0.00037249	0.00048942	0.00054131	2.6886e-05	7.1868e-06	0.0072703	0.0032575
OE6A082229	0.9773	0.9428	0.73161	0.94356	0.93566	0.90327	0.78803	0.97553	0.95153	-0.010546	0.92967	0.91229	0.75856	0.89652	-0.31988	0.64035	0.96506	0.76772	0.95018	-0.95792	-0.96695	-0.89994	-0.95718	-0.83058	-0.91386	-0.85415	-0.96042	-0.69339	-0.7862	-0.94654	-0.93675	0.83966		0.0090769	6.0818e-07	6.2223e-07	0.025051	8.5284e-07	0.039519	0.00013364	1.1646e-06	0.0051941	5.7751e-06	6.0089e-09	3.0758e-07	2.7031e-08	4.5715e-07	7.1779e-06	0.00093506
OE6A049944	0.76461	0.79901	0.59848	0.7766	0.77881	0.77324	0.57023	0.7583	0.6438	0.16065	0.67624	0.72987	0.54064	0.67495	-0.20185	0.47826	0.78012	0.50722	0.71978	-0.69112	-0.71013	-0.69655	-0.66928	-0.70001	-0.73469	-0.69883	-0.67536	-0.59373	-0.71776	-0.76801	-0.73318	0.56652	0.71416		0.0010688	0.07989	0.13421	0.0052224	0.22837	0.016074	0.004647	0.14546	0.014886	0.0086851	0.0038687	0.014452	0.014144	0.0021242	0.013321
OE6A074408	0.93044	0.9554	0.63173	0.98155	0.97065	0.93828	0.74869	0.97726	0.89821	-0.036484	0.89156	0.93696	0.69039	0.92346	-0.35984	0.59563	0.97167	0.74129	0.91425	-0.91785	-0.95816	-0.85767	-0.91503	-0.80985	-0.89158	-0.82769	-0.9474	-0.66302	-0.75301	-0.9219	-0.91012	0.74196	0.96171	0.82077		0.00016895	0.052328	5.3625e-06	0.03946	0.00025162	3.8269e-06	0.0075371	6.1383e-05	2.578e-07	5.326e-07	3.6606e-05	3.29e-05	4.1764e-07	0.00014291
OE6A095147	0.91082	0.8661	0.65458	0.87438	0.85543	0.83608	0.75603	0.91814	0.93228	-0.028477	0.88773	0.85163	0.7389	0.85819	-0.2977	0.5974	0.89588	0.74642	0.89279	-0.92653	-0.91491	-0.86103	-0.93652	-0.7919	-0.86011	-0.81909	-0.92118	-0.6581	-0.71171	-0.90222	-0.88872	0.82802	0.96153	0.52467	0.87858		0.031563	7.2913e-05	0.047937	0.00067008	4.7132e-05	0.0032844	3.2674e-05	4.3848e-06	4.527e-05	2.4571e-06	1.0352e-05	0.00038437	0.0043207
OE6A081156	0.70673	0.78223	0.66576	0.44455	0.62357	0.77635	0.95946	0.60839	0.80565	0.19135	0.79779	0.75737	0.9801	0.69239	-0.1259	0.95208	0.6731	0.86089	0.79804	-0.63831	-0.48944	-0.69494	-0.62077	-0.59721	-0.59336	-0.5422	-0.67308	-0.43004	-0.62299	-0.6287	-0.62173	0.92893	0.63981	0.45811	0.57132	0.61985		0.13634	0.027732	0.1823	0.028822	0.013414	0.011097	0.014594	0.011875	0.0059746	0.0013892	0.046816	0.0041054
OE6A053999	0.94194	0.85728	0.69945	0.94894	0.89733	0.8239	0.63642	0.96351	0.86706	-0.13387	0.86579	0.84227	0.60472	0.84133	-0.36232	0.48902	0.93404	0.66309	0.88619	-0.89551	-0.96597	-0.82601	-0.93698	-0.73948	-0.85013	-0.79202	-0.9245	-0.62467	-0.69636	-0.88515	-0.872	0.71099	0.95899	0.74719	0.94039	0.89806	0.45591		0.055424	0.00013506	5.8261e-05	0.011434	0.00024435	4.1434e-06	7.8663e-05	1.5591e-05	0.00030932	3.6832e-05	0.0072452
OE6A108606	-0.61709	-0.64436	-0.52248	-0.51418	-0.61992	-0.69475	-0.76489	-0.69045	-0.7593	0.5991	-0.79286	-0.78319	-0.70158	-0.80315	0.71691	-0.78181	-0.7295	-0.85666	-0.75604	0.46312	0.50624	0.51631	0.60871	0.21443	0.30292	0.19386	0.7692	-0.074158	0.16188	0.39046	0.36248	-0.6349	-0.59914	-0.376	-0.59928	-0.58025	-0.63118	-0.56533		0.40824	0.093884	0.0027974	0.12567	0.011235	0.070643	0.019256	0.029712	0.041748	0.0033663
OE6A068581	-0.84098	-0.80309	-0.57528	-0.88931	-0.82997	-0.76778	-0.54894	-0.84212	-0.74832	-0.16021	-0.71075	-0.73243	-0.53613	-0.72118	0.11885	-0.36011	-0.81118	-0.54772	-0.76218	0.85888	0.92967	0.73759	0.82555	0.79476	0.8954	0.88167	0.77876	0.81171	0.7791	0.90634	0.89557	-0.64035	-0.88437	-0.67477	-0.86802	-0.83774	-0.41282	-0.88412	0.26334		0.00046481	0.049375	3.8349e-05	0.00064194	0.00027948	0.0010004	0.0015417	0.0005623	0.021516
OE6A113723	-0.93744	-0.93682	-0.67861	-0.92432	-0.91705	-0.89052	-0.75438	-0.9214	-0.90672	-0.13833	-0.86809	-0.86788	-0.72265	-0.8406	0.13426	-0.56827	-0.9042	-0.66374	-0.88699	0.98353	0.90804	0.97119	0.93737	0.92346	0.96123	0.92949	0.91048	0.78931	0.77748	0.96881	0.97452	-0.81359	-0.95631	-0.75361	-0.94435	-0.90686	-0.62785	-0.90268	0.50517	0.84983		0.0064832	8.5286e-06	7.4342e-06	2.4605e-07	2.0164e-05	8.3494e-06	2.5513e-05	0.0027171
OE6A104547	-0.75292	-0.77475	-0.58852	-0.66353	-0.7352	-0.81141	-0.79168	-0.77155	-0.8387	0.20029	-0.80557	-0.81832	-0.75933	-0.82902	0.29626	-0.67905	-0.77501	-0.82882	-0.80609	0.7382	0.69367	0.73988	0.83692	0.57791	0.63388	0.59718	0.86033	0.41102	0.38563	0.65968	0.67176	-0.75712	-0.7475	-0.44668	-0.72578	-0.77164	-0.68788	-0.69894	0.77949	0.57726	0.73481		0.0020029	0.0009584	0.0062287	0.0026287	0.0040146	0.0092454	0.0030505
OE6A055813	-0.92966	-0.9296	-0.69962	-0.87073	-0.88738	-0.89929	-0.79339	-0.89156	-0.89938	-0.21174	-0.85517	-0.86039	-0.78694	-0.82992	0.083593	-0.62593	-0.88367	-0.74658	-0.89441	0.95676	0.91761	0.88822	0.93132	0.89448	0.95126	0.92584	0.8932	0.82745	0.82362	0.95267	0.96228	-0.85668	-0.93948	-0.6804	-0.90163	-0.91364	-0.70097	-0.86883	0.46721	0.91074	0.93446	0.79489		1.1008e-05	1.3913e-06	1.3574e-05	5.7264e-06	0.00017289	0.0020326
OE6A117416	-0.96647	-0.95985	-0.70744	-0.93687	-0.95308	-0.94535	-0.83566	-0.98845	-0.96712	0.092008	-0.95847	-0.95901	-0.79596	-0.9484	0.37901	-0.70447	-0.98471	-0.84221	-0.97033	0.93319	0.95336	0.87876	0.96106	0.78403	0.87215	0.80072	0.99084	0.62015	0.73419	0.90751	0.90132	-0.84818	-0.98491	-0.71697	-0.96781	-0.94278	-0.68184	-0.94344	0.70014	0.83921	0.93627	0.8249	0.93094		5.1777e-07	9.8091e-08	6.4555e-07	5.5292e-06	0.00010294
OE6A078092	0.94802	0.97151	0.64744	0.93991	0.96674	0.9459	0.81794	0.9476	0.92362	0.13746	0.91263	0.92662	0.78261	0.8969	-0.17801	0.66001	0.941	0.76613	0.92285	-0.96873	-0.93404	-0.9116	-0.94058	-0.88895	-0.94776	-0.89667	-0.93171	-0.76482	-0.83452	-0.95974	-0.96457	0.84491	0.96664	0.76332	0.96272	0.90763	0.69636	0.89644	-0.53886	-0.86508	-0.96811	-0.73715	-0.95471	-0.96293		7.0538e-06	1.8323e-07	2.7802e-06	0.00027377
OE6A077716	0.98586	0.93689	0.80711	0.869	0.88896	0.89764	0.85296	0.95253	0.97631	-0.017476	0.96045	0.90908	0.84652	0.88363	-0.32053	0.74225	0.9536	0.82705	0.97942	-0.93033	-0.91812	-0.89791	-0.94431	-0.79646	-0.87349	-0.80806	-0.95472	-0.64219	-0.7796	-0.9125	-0.90157	0.91704	0.97958	0.68255	0.91159	0.94915	0.73957	0.92583	-0.66104	-0.82329	-0.92181	-0.78245	-0.92791	-0.97352	0.93695		8.4183e-08	0.00013003	0.0011488
OE6A115934	0.96015	0.96902	0.73131	0.86539	0.9185	0.93815	0.90467	0.93155	0.97506	0.096497	0.95849	0.93417	0.88868	0.90054	-0.24611	0.78405	0.94124	0.84703	0.96646	-0.94064	-0.88897	-0.91004	-0.92098	-0.84305	-0.89832	-0.83898	-0.93459	-0.68899	-0.82143	-0.93182	-0.92366	0.93671	0.96386	0.6841	0.91352	0.9318	0.81042	0.86218	-0.62519	-0.80614	-0.93474	-0.7614	-0.93958	-0.96124	0.96996	0.97432		6.3852e-05	0.00022122
OE6A057230	0.91726	0.92612	0.61248	0.95558	0.98622	0.91536	0.75462	0.95006	0.88976	-0.041858	0.88804	0.92529	0.68512	0.91819	-0.36222	0.58936	0.95135	0.75119	0.88876	-0.89138	-0.90829	-0.84107	-0.91743	-0.76355	-0.8533	-0.81204	-0.91417	-0.63492	-0.69211	-0.91026	-0.87629	0.72797	0.93673	0.79227	0.96451	0.85573	0.58262	0.91148	-0.59388	-0.84366	-0.91793	-0.71298	-0.87799	-0.94001	0.94786	0.88503	0.90082		0.00028961
OE6A048706	0.80528	0.93071	0.5321	0.81127	0.90347	0.965	0.89694	0.87623	0.88279	-0.12428	0.89487	0.9756	0.82735	0.96142	-0.48379	0.82038	0.91581	0.9182	0.89612	-0.74893	-0.78292	-0.71175	-0.7738	-0.62586	-0.69631	-0.61055	-0.89184	-0.42523	-0.6239	-0.75207	-0.72883	0.77205	0.82582	0.68836	0.88275	0.75752	0.76022	0.72818	-0.77041	-0.65226	-0.78088	-0.77529	-0.79424	-0.89049	0.86567	0.81799	0.87154	0.86407
OE6A065720	0.79774	0.7355	0.45784	0.94666	0.8339	0.72087	0.43403	0.89835	0.72227	-0.20447	0.72973	0.74338	0.38061	0.77151	-0.38487	0.26655	0.84341	0.49122	0.73302	-0.79822	-0.92118	-0.69811	-0.8325	-0.65299	-0.76169	-0.70863	-0.82786	-0.54873	-0.5946	-0.79653	-0.77995	0.49834	0.8686	0.68192	0.89247	0.82069	0.21179	0.94451	-0.44898	-0.83636	-0.82125	-0.55409	-0.74035	-0.84696	0.80563	0.7864	0.7257	0.84336	0.63701
OE6A034993	0.79114	0.81046	0.39937	0.95994	0.88714	0.7784	0.50992	0.86609	0.72121	0.077998	0.71306	0.76765	0.44391	0.76463	-0.18115	0.31932	0.82342	0.48728	0.72272	-0.87407	-0.91613	-0.76321	-0.81862	-0.80804	-0.87559	-0.82387	-0.8069	-0.72094	-0.74288	-0.86622	-0.88039	0.54443	0.87316	0.70461	0.91767	0.81011	0.32594	0.86296	-0.32761	-0.84765	-0.88321	-0.49972	-0.8002	-0.84201	0.89305	0.76769	0.79085	0.87386	0.70645
OE6A051290	-0.87334	-0.87424	-0.63528	-0.85455	-0.89434	-0.898	-0.81721	-0.94408	-0.93177	0.36543	-0.93641	-0.95005	-0.75427	-0.96979	0.61285	-0.71958	-0.95414	-0.893	-0.92677	0.78194	0.8504	0.74906	0.88482	0.56535	0.67517	0.59776	0.9615	0.35681	0.50449	0.7577	0.72038	-0.75893	-0.89412	-0.61964	-0.89259	-0.86762	-0.63374	-0.87426	0.86033	0.69877	0.8072	0.86221	0.79886	0.94438	-0.84123	-0.89455	-0.86279	-0.89014	-0.89821
OE6A011870	-0.83618	-0.85709	-0.55261	-0.83129	-0.87746	-0.88725	-0.81844	-0.909	-0.92325	0.24554	-0.92121	-0.92518	-0.77021	-0.95081	0.56037	-0.69884	-0.92033	-0.85235	-0.8869	0.761	0.79178	0.75123	0.83187	0.59334	0.67672	0.63794	0.88512	0.39985	0.53959	0.80249	0.72181	-0.77705	-0.87503	-0.59786	-0.85647	-0.8755	-0.65969	-0.82039	0.7583	0.71002	0.80651	0.75938	0.78304	0.89793	-0.8359	-0.87176	-0.8747	-0.88556	-0.86671
OE6A102979	-0.82815	-0.76571	-0.66806	-0.76893	-0.7035	-0.65951	-0.539	-0.734	-0.70032	-0.42693	-0.65826	-0.60933	-0.56475	-0.54646	-0.13332	-0.39306	-0.70492	-0.4092	-0.7196	0.8944	0.83252	0.82227	0.76841	0.91774	0.93933	0.90453	0.6945	0.89385	0.92188	0.88723	0.92729	-0.70987	-0.83514	-0.64888	-0.77073	-0.78242	-0.48294	-0.78419	0.13439	0.83189	0.85548	0.41408	0.83994	0.75578	-0.83766	-0.80618	-0.80701	-0.7	-0.51229
OE6A068286	-0.67883	-0.67692	-0.4991	-0.65929	-0.69844	-0.70593	-0.68134	-0.7719	-0.76227	0.45706	-0.80289	-0.79167	-0.62731	-0.82121	0.81015	-0.6661	-0.80888	-0.76218	-0.7637	0.50191	0.60832	0.50987	0.6162	0.30532	0.39356	0.31883	0.73027	0.056882	0.37698	0.55824	0.44543	-0.59556	-0.69555	-0.54393	-0.69492	-0.66552	-0.51176	-0.68225	0.79962	0.44553	0.56291	0.5291	0.49211	0.72823	-0.61155	-0.71159	-0.68097	-0.71844	-0.75177
OE6A001246	-0.89614	-0.88809	-0.65543	-0.86777	-0.8934	-0.88725	-0.79544	-0.9297	-0.92739	0.20776	-0.90951	-0.91314	-0.73979	-0.91771	0.37354	-0.65772	-0.91863	-0.81349	-0.90801	0.8888	0.87173	0.86532	0.95323	0.71218	0.78752	0.72097	0.97763	0.51703	0.55287	0.80893	0.82287	-0.785	-0.912	-0.61292	-0.90065	-0.89462	-0.63508	-0.88302	0.7766	0.71101	0.89233	0.91852	0.86332	0.95405	-0.88849	-0.90524	-0.88151	-0.87868	-0.84265
OE6A106926	-0.96655	-0.96054	-0.70742	-0.93954	-0.9431	-0.92288	-0.80628	-0.96315	-0.94728	-0.066032	-0.92719	-0.91862	-0.77705	-0.8959	0.28169	-0.65231	-0.95953	-0.74884	-0.93994	0.95623	0.92971	0.92808	0.93387	0.86798	0.92595	0.87995	0.93317	0.71815	0.80983	0.97027	0.94666	-0.84941	-0.98476	-0.77267	-0.96387	-0.93337	-0.67058	-0.92899	0.57237	0.86093	0.97411	0.71112	0.92736	0.96636	-0.97633	-0.96211	-0.96946	-0.94673	-0.83727
OE6A095422	-0.9311	-0.92456	-0.68272	-0.90239	-0.92963	-0.92509	-0.83436	-0.97301	-0.96709	0.22524	-0.95895	-0.95828	-0.78144	-0.96413	0.48183	-0.70719	-0.97364	-0.85438	-0.95293	0.88083	0.89247	0.86259	0.94402	0.70385	0.78849	0.72276	0.9859	0.49864	0.60431	0.85171	0.8271	-0.81757	-0.94884	-0.67847	-0.93686	-0.91978	-0.66511	-0.91689	0.79585	0.75173	0.90345	0.86266	0.86587	0.97888	-0.91175	-0.94366	-0.9222	-0.92719	-0.88666
OE6A091010	0.92656	0.88143	0.7692	0.79256	0.80412	0.80996	0.75122	0.82444	0.84997	0.34762	0.82059	0.76326	0.77604	0.70131	0.076593	0.61486	0.81217	0.63528	0.8587	-0.95533	-0.84989	-0.92385	-0.89079	-0.93513	-0.95893	-0.92503	-0.82193	-0.85994	-0.89443	-0.9303	-0.96306	0.88389	0.89818	0.70023	0.82914	0.85019	0.70939	0.82824	-0.37113	-0.81762	-0.92165	-0.66226	-0.93597	-0.86389	0.91922	0.91154	0.91748	0.79111	0.66641
OE6A036399	0.8589	0.92257	0.74826	0.66868	0.78716	0.89575	0.97337	0.78482	0.9097	0.18725	0.89034	0.87509	0.97567	0.81185	-0.18304	0.91788	0.83231	0.88471	0.91682	-0.81252	-0.71776	-0.82078	-0.77177	-0.75936	-0.78349	-0.71596	-0.82722	-0.5979	-0.77891	-0.8024	-0.80563	0.96212	0.82186	0.61655	0.77461	0.7773	0.95038	0.66543	-0.63545	-0.6368	-0.80291	-0.74114	-0.85663	-0.84527	0.86102	0.87843	0.93236	0.75132	0.86384
OE6A072071	0.48279	0.4332	0.2009	0.58388	0.47517	0.36464	0.12872	0.43561	0.32455	0.5966	0.28926	0.27073	0.15814	0.2396	0.51009	-0.079628	0.35425	0.00068725	0.30818	-0.67769	-0.58718	-0.57518	-0.53983	-0.78359	-0.76872	-0.81199	-0.35613	-0.89293	-0.70068	-0.68501	-0.73923	0.33939	0.53161	0.43138	0.5022	0.51944	0.10431	0.52732	0.29374	-0.69612	-0.63354	-0.15772	-0.61477	-0.4352	0.59735	0.44597	0.47844	0.46825	0.16594
OE6A073944	-0.91374	-0.89935	-0.69563	-0.8561	-0.85413	-0.82091	-0.72918	-0.85035	-0.84766	-0.28832	-0.81787	-0.79083	-0.71788	-0.73436	-0.001172	-0.5783	-0.83517	-0.60931	-0.85044	0.96963	0.88213	0.9277	0.87527	0.93783	0.97023	0.91516	0.84331	0.83733	0.88406	0.93405	0.9738	-0.82323	-0.91987	-0.70272	-0.87952	-0.8583	-0.64748	-0.83815	0.37985	0.81897	0.95	0.59867	0.90669	0.87934	-0.94672	-0.89553	-0.92369	-0.83645	-0.71201
OE6A008716	-0.83872	-0.87111	-0.72082	-0.64893	-0.77384	-0.85848	-0.93584	-0.76664	-0.9097	-0.093019	-0.87337	-0.84534	-0.92581	-0.80574	0.12656	-0.83485	-0.79386	-0.85301	-0.87571	0.83215	0.6761	0.87759	0.84296	0.74453	0.7589	0.72243	0.84588	0.57125	0.60302	0.77422	0.78858	-0.93085	-0.79803	-0.53213	-0.74012	-0.79165	-0.90205	-0.66823	0.69702	0.58032	0.82327	0.89101	0.85153	0.83816	-0.83235	-0.85454	-0.88946	-0.75142	-0.80136
OE6A040780	0.50386	0.72296	0.36892	0.44665	0.62562	0.74918	0.78022	0.48986	0.57761	0.25055	0.5805	0.69959	0.72659	0.63367	-0.11333	0.7438	0.57151	0.68059	0.59632	-0.48865	-0.37798	-0.5366	-0.43279	-0.52981	-0.50492	-0.46665	-0.52336	-0.38596	-0.50566	-0.52169	-0.51312	0.6048	0.46169	0.61515	0.56674	0.34447	0.77255	0.2998	-0.47763	-0.32588	-0.53293	-0.52243	-0.54894	-0.53288	0.61523	0.47348	0.61073	0.58384	0.79266
OE6A048764	0.26551	0.16302	0.040176	0.41398	0.25014	0.094153	-0.18551	0.23362	0.057644	0.52534	0.038172	0.010237	-0.14471	-0.0035961	0.4929	-0.36613	0.14148	-0.27009	0.060649	-0.42278	-0.41309	-0.30553	-0.30467	-0.5388	-0.54029	-0.60444	-0.10397	-0.71935	-0.52165	-0.47652	-0.50263	0.050988	0.31645	0.32109	0.29515	0.29564	-0.21306	0.38846	0.51366	-0.5797	-0.38876	0.13051	-0.36555	-0.19518	0.34223	0.21549	0.20767	0.27147	-0.10622
OE6A081102	-0.3235	-0.34946	-0.4842	-0.030679	-0.21391	-0.38926	-0.64078	-0.27494	-0.44188	0.34499	-0.49385	-0.44201	-0.6487	-0.4077	0.4069	-0.79309	-0.35299	-0.69889	-0.48695	0.12331	0.10605	0.20129	0.25401	-0.033986	0.0027925	-0.10271	0.39854	-0.24274	0.054592	0.036388	0.046507	-0.52893	-0.21019	-0.14712	-0.17495	-0.17804	-0.67235	-0.14246	0.76937	-0.10344	0.11287	0.55165	0.19553	0.32886	-0.19367	-0.36047	-0.33539	-0.16376	-0.47696
OE6A005638	-0.62193	-0.6363	-0.61031	-0.40614	-0.5603	-0.66789	-0.84268	-0.62404	-0.75311	0.42343	-0.79686	-0.74727	-0.81976	-0.73577	0.64737	-0.91694	-0.69058	-0.91252	-0.7719	0.41767	0.45073	0.45472	0.53941	0.19835	0.28429	0.17034	0.69344	-0.048583	0.29683	0.37863	0.34013	-0.73607	-0.56857	-0.33974	-0.51664	-0.54602	-0.78148	-0.48407	0.91925	0.24872	0.4278	0.67042	0.4678	0.65166	-0.51701	-0.67304	-0.65691	-0.53025	-0.74803
OE6A074153	-0.7016	-0.67112	-0.59446	-0.62954	-0.6089	-0.56339	-0.47871	-0.5626	-0.59526	-0.60165	-0.50827	-0.48463	-0.49483	-0.42018	-0.3063	-0.27543	-0.55091	-0.26137	-0.56222	0.81666	0.61888	0.83984	0.67164	0.92454	0.88035	0.93103	0.52553	0.92635	0.76224	0.85593	0.8602	-0.61773	-0.68622	-0.61987	-0.64078	-0.64012	-0.46258	-0.60937	-0.0012873	0.71112	0.81387	0.37678	0.75712	0.59737	-0.73542	-0.64725	-0.69008	-0.65269	-0.39192
OE6A060413	0.37519	0.53844	0.43532	0.1413	0.36715	0.56673	0.81269	0.31645	0.54245	0.027425	0.54016	0.56757	0.79766	0.51132	-0.26953	0.8789	0.42353	0.73741	0.53924	-0.26951	-0.13697	-0.38388	-0.27147	-0.24567	-0.21607	-0.1627	-0.40922	-0.042895	-0.26296	-0.27338	-0.24579	0.64239	0.29931	0.28609	0.30371	0.26002	0.86481	0.10588	-0.64167	-0.034433	-0.29958	-0.51839	-0.34805	-0.38652	0.3743	0.40288	0.49863	0.32968	0.65417
OE6A092496	0.83789	0.75652	0.54571	0.92522	0.81988	0.70353	0.4398	0.85154	0.71118	0.11576	0.68557	0.68312	0.41795	0.6798	-0.10353	0.23838	0.79646	0.42648	0.71935	-0.88564	-0.93536	-0.77493	-0.8609	-0.81561	-0.89805	-0.87982	-0.7802	-0.79563	-0.75108	-0.89639	-0.8986	0.56629	0.88652	0.69769	0.87442	0.83885	0.2766	0.92938	-0.24299	-0.93769	-0.87655	-0.52409	-0.84753	-0.82986	0.8545	0.80718	0.76732	0.84006	0.56589
OE6A012604	-0.84825	-0.89035	-0.73907	-0.67185	-0.76501	-0.87148	-0.88985	-0.76147	-0.86462	-0.26227	-0.82229	-0.8192	-0.90392	-0.76329	0.013549	-0.78432	-0.78716	-0.80798	-0.86476	0.84716	0.73345	0.84548	0.82509	0.81575	0.83289	0.80496	0.81455	0.71539	0.74003	0.82474	0.84657	-0.91688	-0.80452	-0.6185	-0.76344	-0.774	-0.87187	-0.68812	0.54405	0.70599	0.82548	0.84659	0.92143	0.83281	-0.85231	-0.85263	-0.88362	-0.73801	-0.78709
OE6A073013	0.29401	0.391	0.35813	0.064462	0.27491	0.45532	0.71635	0.29622	0.48897	-0.36174	0.53583	0.51613	0.7004	0.49967	-0.52105	0.84742	0.38749	0.76001	0.49614	-0.10486	-0.081082	-0.19957	-0.21067	0.043072	0.013776	0.10465	-0.39236	0.28092	-0.04329	-0.076113	-0.037792	0.54497	0.22503	0.12142	0.20358	0.21559	0.73265	0.099311	-0.80065	0.097058	-0.13093	-0.50235	-0.18237	-0.33763	0.22663	0.35399	0.38528	0.22803	0.57895
OE6A024133	0.63428	0.72727	0.44392	0.60001	0.71966	0.80003	0.8138	0.74124	0.77963	-0.49166	0.82375	0.86567	0.73844	0.88452	-0.71729	0.80986	0.7897	0.90124	0.78126	-0.49069	-0.55145	-0.52138	-0.61464	-0.28254	-0.36637	-0.27071	-0.78016	-0.010559	-0.26745	-0.47581	-0.42178	0.64543	0.63423	0.49957	0.68055	0.59167	0.67184	0.5797	-0.95375	-0.3524	-0.55079	-0.75114	-0.52534	-0.73648	0.62007	0.67	0.6789	0.68882	0.88199
OE6A106143	0.4673	0.60044	0.38828	0.34682	0.5318	0.67129	0.80918	0.52594	0.64524	-0.38711	0.69467	0.72817	0.75175	0.72006	-0.61466	0.87422	0.60631	0.85466	0.65281	-0.30797	-0.30916	-0.38206	-0.40489	-0.14875	-0.19387	-0.095548	-0.59448	0.12336	-0.18149	-0.29038	-0.24575	0.60814	0.43033	0.36488	0.46845	0.38299	0.74854	0.32045	-0.89303	-0.11096	-0.36157	-0.62293	-0.3577	-0.54517	0.45197	0.50689	0.55236	0.48629	0.78772
OE6A083912	-0.019045	-0.0078941	0.045017	-0.064375	0.021082	0.087637	0.20865	0.10921	0.14645	-0.86263	0.21044	0.21762	0.15028	0.28171	-0.84244	0.35219	0.16304	0.42547	0.16227	0.25459	0.069487	0.21845	0.037044	0.50904	0.40717	0.49528	-0.16554	0.70417	0.42392	0.27739	0.35055	0.011545	-0.028987	-0.12374	-0.0090737	-0.014098	0.10827	0.010086	-0.70373	0.26001	0.20709	-0.2566	0.19395	-0.083534	-0.14157	0.038865	-0.03262	0.017334	0.26372
OE6A118632	0.41617	0.47533	0.047513	0.6639	0.66105	0.52191	0.2937	0.60463	0.4087	-0.41629	0.49961	0.59213	0.17194	0.62885	-0.62438	0.24084	0.6024	0.41348	0.4455	-0.33425	-0.53597	-0.24483	-0.3961	-0.1661	-0.29433	-0.20587	-0.50831	-0.036593	-0.26375	-0.37922	-0.32096	0.15266	0.4892	0.53435	0.61695	0.37055	0.074924	0.53899	-0.43957	-0.41215	-0.40286	-0.16427	-0.27987	-0.51239	0.49314	0.38716	0.41122	0.65241	0.59937
OE6A043940	0.49747	0.37379	0.3535	0.63952	0.49278	0.33535	-0.0050708	0.53787	0.26782	-0.10102	0.30493	0.33029	-0.035654	0.32906	-0.18414	-0.10926	0.48903	0.070713	0.36218	-0.4377	-0.6305	-0.33072	-0.47787	-0.36493	-0.48193	-0.45194	-0.42599	-0.40858	-0.40235	-0.47287	-0.46898	0.084101	0.49374	0.68383	0.57596	0.33969	-0.18042	0.69111	-0.056016	-0.63799	-0.45881	-0.1622	-0.40923	-0.45707	0.43766	0.40503	0.29429	0.53409	0.233
OE6A114644	0.71924	0.64186	0.34762	0.89787	0.79179	0.63881	0.36151	0.84547	0.65566	-0.32118	0.68054	0.68705	0.29343	0.73092	-0.41765	0.20829	0.77926	0.46537	0.662	-0.72236	-0.87998	-0.58866	-0.78174	-0.52492	-0.66258	-0.59209	-0.78593	-0.43406	-0.48999	-0.68755	-0.68634	0.41159	0.80787	0.5376	0.82056	0.77807	0.12884	0.89074	-0.44713	-0.77033	-0.72735	-0.50174	-0.65519	-0.79198	0.73713	0.7174	0.65642	0.7892	0.58488
OE6A060484	-0.25825	-0.2522	0.1084	-0.57266	-0.44223	-0.26918	0.1271	-0.36405	-0.12798	-0.15425	-0.1108	-0.21246	0.18472	-0.25624	-0.16278	0.36973	-0.28173	0.1138	-0.10339	0.4136	0.45626	0.31793	0.40707	0.44443	0.47414	0.55308	0.25554	0.54489	0.2388	0.46696	0.45534	0.070866	-0.34321	-0.43736	-0.45132	-0.30408	0.27683	-0.46111	-0.19968	0.57171	0.44583	0.16404	0.37877	0.30348	-0.3925	-0.1876	-0.18915	-0.47878	-0.14014
OE6A100286	-0.87325	-0.81693	-0.66406	-0.83713	-0.84308	-0.81894	-0.74552	-0.92862	-0.91382	0.4105	-0.9107	-0.88459	-0.69219	-0.90899	0.58298	-0.64498	-0.91923	-0.82299	-0.90239	0.79475	0.86017	0.75729	0.89998	0.55466	0.67102	0.58694	0.95787	0.35046	0.47372	0.73365	0.71648	-0.73776	-0.89775	-0.53669	-0.85883	-0.89391	-0.55843	-0.89887	0.83519	0.68819	0.80251	0.84493	0.77743	0.93192	-0.80971	-0.90103	-0.83784	-0.84253	-0.80095
OE6A045568	-0.95444	-0.94175	-0.68514	-0.95698	-0.94911	-0.92389	-0.77478	-0.98696	-0.93607	0.10766	-0.92534	-0.9355	-0.72815	-0.92816	0.36156	-0.63009	-0.97296	-0.78515	-0.94279	0.93733	0.96773	0.87731	0.96298	0.7897	0.88008	0.80873	0.98726	0.63273	0.71351	0.90157	0.90568	-0.79365	-0.97915	-0.73257	-0.97729	-0.92878	-0.60487	-0.96069	0.67031	0.85015	0.94321	0.81517	0.92094	0.9925	-0.95482	-0.95247	-0.93009	-0.93771	-0.86165
OE6A047144	-0.51753	-0.38547	-0.38497	-0.47094	-0.41944	-0.34565	-0.33165	-0.55305	-0.49258	0.39272	-0.56356	-0.43271	-0.32848	-0.43251	0.35006	-0.36472	-0.50627	-0.40221	-0.53055	0.44096	0.55469	0.36584	0.4736	0.22061	0.3418	0.18867	0.56115	0.075444	0.36327	0.31464	0.37394	-0.43623	-0.54186	-0.1856	-0.44788	-0.5295	-0.22861	-0.57204	0.47252	0.33125	0.40228	0.24994	0.32841	0.52899	-0.43539	-0.56478	-0.48585	-0.36257	-0.33657
OE6A030751	0.55865	0.47944	0.24298	0.8028	0.6511	0.44394	0.10589	0.66277	0.42504	-0.16472	0.41714	0.47076	0.027934	0.50681	-0.29567	-0.075255	0.59848	0.18803	0.44405	-0.59556	-0.77758	-0.43667	-0.60145	-0.47165	-0.60186	-0.56685	-0.57112	-0.48518	-0.43566	-0.60608	-0.60043	0.15422	0.65673	0.50637	0.70346	0.59593	-0.12741	0.76481	-0.13116	-0.76725	-0.60309	-0.25236	-0.53557	-0.60228	0.59292	0.51546	0.46007	0.68475	0.38959
OE6A106272	0.44032	0.29899	0.14402	0.67105	0.49106	0.25622	-0.08773	0.51416	0.27014	-0.081198	0.26488	0.26581	-0.13429	0.30539	-0.029817	-0.28426	0.4129	-0.028869	0.27244	-0.53058	-0.65353	-0.38712	-0.53907	-0.43315	-0.53843	-0.53532	-0.42638	-0.49921	-0.33346	-0.50503	-0.53051	0.049653	0.52575	0.37105	0.53824	0.49541	-0.27709	0.67277	0.052204	-0.66796	-0.51752	-0.16963	-0.43605	-0.45455	0.46552	0.3926	0.31566	0.52344	0.1368
OE6A065332	0.4194	0.3082	0.088296	0.67072	0.49342	0.26571	-0.057562	0.50468	0.28874	-0.04771	0.2608	0.27705	-0.11273	0.32359	-0.016731	-0.26939	0.40295	-0.0057307	0.26592	-0.55634	-0.65942	-0.39405	-0.54298	-0.46425	-0.55624	-0.55305	-0.43752	-0.52383	-0.34159	-0.51464	-0.5492	0.063335	0.5365	0.26891	0.53545	0.54773	-0.24651	0.6373	0.056822	-0.66506	-0.52856	-0.19407	-0.45917	-0.46436	0.48396	0.39307	0.34252	0.51615	0.16752
OE6A098796	-0.86639	-0.82385	-0.69452	-0.78047	-0.82511	-0.82629	-0.80725	-0.9023	-0.91323	0.40495	-0.92758	-0.89427	-0.75944	-0.90065	0.57433	-0.75112	-0.90729	-0.88726	-0.92238	0.76166	0.82845	0.72125	0.86356	0.51233	0.63638	0.52471	0.95203	0.30231	0.49194	0.68045	0.68295	-0.78185	-0.86915	-0.51716	-0.82587	-0.84698	-0.64837	-0.84749	0.87738	0.6322	0.75602	0.84008	0.75936	0.91814	-0.79625	-0.89634	-0.84436	-0.80323	-0.83203
OE6A013923	0.63555	0.53711	0.29811	0.84051	0.69602	0.51757	0.22422	0.76076	0.56081	-0.33203	0.56362	0.57025	0.15317	0.62338	-0.41007	0.054846	0.68752	0.31643	0.55442	-0.65591	-0.81318	-0.53515	-0.70143	-0.47562	-0.60344	-0.55207	-0.69184	-0.40214	-0.40056	-0.63222	-0.62162	0.28826	0.7372	0.47046	0.74759	0.71912	-0.018861	0.83949	-0.3455	-0.72833	-0.67086	-0.39976	-0.5663	-0.70001	0.6421	0.62878	0.55321	0.71704	0.45851
OE6A090531	0.40706	0.35044	0.29161	0.42534	0.41452	0.40032	0.37354	0.55533	0.49159	-0.81356	0.56554	0.53079	0.31874	0.59043	-0.90231	0.4353	0.56336	0.56957	0.52024	-0.19379	-0.42876	-0.16444	-0.36256	0.094775	-0.053852	0.069548	-0.54256	0.31434	-0.031712	-0.1783	-0.11054	0.29437	0.4407	0.22197	0.43301	0.42989	0.18794	0.50878	-0.76948	-0.21634	-0.23871	-0.36595	-0.1849	-0.49452	0.29	0.46469	0.36556	0.40774	0.49413
OE6A044469	0.40163	0.41775	0.23078	0.44031	0.49653	0.51103	0.48188	0.57274	0.53241	-0.81666	0.60969	0.62624	0.39777	0.69082	-0.86758	0.51776	0.59245	0.67253	0.54069	-0.21712	-0.38737	-0.22621	-0.41978	0.066802	-0.057396	0.046048	-0.59281	0.32175	0.054436	-0.18499	-0.12022	0.32456	0.42198	0.28106	0.46806	0.40244	0.29789	0.47059	-0.89402	-0.15612	-0.28086	-0.55234	-0.22324	-0.5255	0.33635	0.44517	0.38559	0.47914	0.61741
OE6A042315	0.37127	0.49977	0.048858	0.63121	0.5936	0.55906	0.321	0.59684	0.41975	-0.51256	0.48064	0.61647	0.19466	0.65523	-0.67285	0.28148	0.59749	0.42707	0.4549	-0.32526	-0.50771	-0.28515	-0.37098	-0.18413	-0.26809	-0.15812	-0.55972	0.034843	-0.17119	-0.31998	-0.29522	0.14687	0.45573	0.52654	0.6278	0.35195	0.089036	0.4998	-0.58603	-0.30559	-0.4183	-0.32551	-0.26245	-0.5227	0.45348	0.36669	0.374	0.5582	0.65582
OE6A029462	0.352	0.4459	0.074407	0.56838	0.52504	0.51285	0.31135	0.57774	0.42269	-0.61922	0.49095	0.58618	0.20339	0.63702	-0.7534	0.29691	0.57822	0.42806	0.44896	-0.26574	-0.44531	-0.26334	-0.34811	-0.10427	-0.18173	-0.077598	-0.53843	0.14997	-0.090032	-0.26791	-0.21874	0.1591	0.42394	0.48231	0.56904	0.34428	0.085662	0.48762	-0.65645	-0.22461	-0.37026	-0.33263	-0.19664	-0.4939	0.38435	0.36502	0.34102	0.49978	0.60013
OE6A063529	-0.55209	-0.57502	-0.43821	-0.48378	-0.57953	-0.63673	-0.70194	-0.65577	-0.7072	0.67599	-0.75024	-0.74374	-0.63369	-0.78125	0.8295	-0.73349	-0.69752	-0.83101	-0.70212	0.372	0.46834	0.4026	0.53455	0.1052	0.20971	0.10205	0.70859	-0.17424	0.11098	0.33168	0.2732	-0.556	-0.55473	-0.31134	-0.55179	-0.55048	-0.55234	-0.52791	0.97382	0.23742	0.41825	0.6784	0.38709	0.64825	-0.473	-0.60755	-0.5695	-0.56273	-0.7379
OE6A056459	-0.68072	-0.68542	-0.46598	-0.68574	-0.7245	-0.74192	-0.68517	-0.80817	-0.78186	0.61374	-0.83026	-0.82747	-0.6221	-0.86867	0.79774	-0.65851	-0.82307	-0.80802	-0.78571	0.51365	0.65315	0.51713	0.64834	0.26212	0.39202	0.29714	0.7981	0.022409	0.27683	0.52135	0.44857	-0.59669	-0.70666	-0.49878	-0.71906	-0.67497	-0.49832	-0.71954	0.89263	0.48759	0.58047	0.66442	0.5295	0.76753	-0.61996	-0.72374	-0.67499	-0.71581	-0.78466
C16:0 (ac. Palmitico tra 7,5%-20%)	-0.8876	-0.87444	-0.63765	-0.8753	-0.88804	-0.8776	-0.78678	-0.95705	-0.91719	0.33453	-0.94156	-0.93189	-0.73723	-0.93783	0.59855	-0.71456	-0.9585	-0.85532	-0.93663	0.78625	0.89482	0.72497	0.84568	0.57393	0.70185	0.59242	0.94933	0.37888	0.61302	0.76495	0.74226	-0.76713	-0.9183	-0.63114	-0.90327	-0.87204	-0.60837	-0.89731	0.78926	0.74051	0.80423	0.72347	0.78526	0.94376	-0.85541	-0.91549	-0.88289	-0.86637	-0.87518
C16:1 (ac. Palmitoleico 0,3%-3,5%)	0.094312	0.09365	0.026902	0.14062	0.1937	0.20159	0.21293	0.26722	0.24676	-0.911	0.30765	0.3294	0.12792	0.41842	-0.84494	0.27115	0.28991	0.43132	0.23412	0.092338	-0.0778	0.052969	-0.14661	0.36764	0.25982	0.32324	-0.30202	0.57801	0.40622	0.11796	0.19929	0.030166	0.11142	0.006532	0.15706	0.12875	0.052084	0.19046	-0.7497	0.11293	0.022526	-0.38537	0.072113	-0.22015	0.0042977	0.13736	0.059743	0.20376	0.33415
C17:1 (ac. Eptadecenoico max 0,30%)	0.032184	-0.073574	-0.21385	0.33936	0.15595	-0.099668	-0.45278	0.13886	-0.17039	-0.082901	-0.12278	-0.085071	-0.51114	-0.04826	0.037911	-0.55707	0.047271	-0.36648	-0.12816	-0.11768	-0.28	0.036892	-0.1308	-0.076694	-0.14774	-0.13518	-0.033271	-0.17132	-0.075639	-0.090142	-0.12727	-0.37407	0.10549	0.20683	0.19034	0.034701	-0.60821	0.29288	0.30334	-0.25432	-0.10318	0.24228	0.011579	-0.051148	0.087419	-0.043175	-0.10193	0.17425	-0.15685
C18:1 (ac. Oleico tra 55%-83%)	0.97387	0.97271	0.72047	0.93556	0.94271	0.94013	0.82739	0.97088	0.95193	0.060724	0.93859	0.93289	0.80455	0.90545	-0.27872	0.69145	0.96826	0.79043	0.96038	-0.95438	-0.95345	-0.90219	-0.93533	-0.8567	-0.92732	-0.86513	-0.95093	-0.71701	-0.83739	-0.95583	-0.94756	0.87021	0.98937	0.7621	0.96706	0.93536	0.69819	0.93161	-0.58847	-0.87761	-0.95823	-0.73739	-0.94947	-0.98096	0.98216	0.97559	0.97904	0.93073	0.86241
C18:2 (ac. Linoleico tra 3,5%-21%)	-0.96993	-0.97066	-0.70147	-0.949	-0.95274	-0.94215	-0.81062	-0.972	-0.94758	-0.064195	-0.9274	-0.93054	-0.78167	-0.90861	0.25277	-0.65384	-0.96408	-0.77076	-0.94643	0.96893	0.95352	0.92287	0.95561	0.87491	0.9396	0.89007	0.95473	0.73791	0.80958	0.9669	0.95924	-0.85142	-0.98841	-0.76826	-0.97462	-0.93848	-0.67452	-0.93819	0.58183	0.88356	0.97672	0.76921	0.95938	0.98253	-0.98727	-0.96604	-0.96988	-0.94581	-0.85542
C20:0 (ac. Arachico max 0,6%)	0.51325	0.41315	0.38405	0.48005	0.37123	0.32832	0.18075	0.42419	0.33299	0.55113	0.33871	0.25245	0.26778	0.19687	0.30827	0.096038	0.37903	0.074902	0.3789	-0.54792	-0.54338	-0.4537	-0.4251	-0.65059	-0.65368	-0.66052	-0.30028	-0.73827	-0.81497	-0.6254	-0.62926	0.42858	0.51082	0.50001	0.43799	0.46634	0.1957	0.52	0.24599	-0.64546	-0.50623	0.0063709	-0.52894	-0.4006	0.51265	0.4951	0.48047	0.37087	0.14266
C18:3 (ac. Linolenico max 1%)	0.39538	0.45256	0.32818	0.31489	0.46586	0.51562	0.6167	0.47519	0.50447	-0.53969	0.59942	0.61509	0.55238	0.61962	-0.78212	0.73348	0.55161	0.75716	0.55843	-0.15514	-0.30119	-0.14626	-0.29874	0.06893	-0.044076	0.083164	-0.4931	0.28505	-0.14014	-0.15976	-0.095636	0.42068	0.36211	0.31834	0.39475	0.28538	0.51991	0.32183	-0.79638	-0.098077	-0.18672	-0.37995	-0.20667	-0.45595	0.33329	0.41986	0.42399	0.43641	0.66751
C20:1 (ac. Eicosenoico max 0,40%)	0.76073	0.63476	0.51475	0.85364	0.73857	0.56097	0.3137	0.76916	0.61196	-0.023234	0.5916	0.57357	0.27195	0.5726	-0.13219	0.13127	0.70463	0.32851	0.62947	-0.80198	-0.88573	-0.67514	-0.78405	-0.67638	-0.79572	-0.74809	-0.7206	-0.67399	-0.61631	-0.75989	-0.79537	0.4357	0.81086	0.56523	0.78772	0.7519	0.13376	0.87988	-0.21819	-0.85655	-0.77768	-0.42786	-0.7288	-0.74801	0.75112	0.71968	0.65791	0.75964	0.4535
C22:0 (ac. Beenico max 0,2%)	0.6691	0.61815	0.32261	0.87253	0.78247	0.61024	0.31741	0.79436	0.57298	-0.27165	0.61347	0.6596	0.23197	0.69105	-0.49848	0.18978	0.75769	0.42338	0.60974	-0.6276	-0.82295	-0.4855	-0.68084	-0.46093	-0.59873	-0.52987	-0.69732	-0.38519	-0.50905	-0.64978	-0.6151	0.31143	0.74248	0.64254	0.80268	0.65519	0.077792	0.83131	-0.37518	-0.73241	-0.64837	-0.3435	-0.57061	-0.72196	0.69098	0.63398	0.5922	0.80021	0.5918
C24:0 (ac. Lignocerico max 0,2%)	0.72797	0.7294	0.36081	0.92495	0.81692	0.74282	0.4246	0.8706	0.66961	-0.24177	0.68858	0.75437	0.35789	0.78261	-0.39771	0.27797	0.82	0.51248	0.70062	-0.73907	-0.89972	-0.61737	-0.77304	-0.60057	-0.71107	-0.63641	-0.81786	-0.49002	-0.55505	-0.72016	-0.72709	0.43839	0.80905	0.67978	0.88386	0.74531	0.19652	0.88329	-0.47808	-0.79029	-0.7647	-0.58286	-0.70989	-0.82205	0.77456	0.72035	0.67329	0.79556	0.69279
[truncated: 54 more columns]

## Sheet: Table S9
Table S9. HPLC-MS/MS analysis parameters: equation for external calibration curve, correlation coefficient R2, molecular ion [M-H]-1 monitored on the first quadrupole and major fragments monitored on the third quadrupole for each phenolic compound analysed by LC-MS/MS.
Phenolic compound	Equation for external calibration curve	Correlation coefficient	Molecolar ion [M-H]-1 on the first quadrupole	Fragments on the third quadrupole
		R2	m/z	m/z
Catechin	Y=236X+104	0.994	289	-
Caffeic acid	Y=2660X+1230	0.994	179	135
Vanillic acid	Y=742X+5685	0.995	167	151
p-Coumaric acid	Y=726,89X+523,2	0.996	163	119
o-Coumaric acid	Y=1034,11X+672,3	0.996	163	119
Apigenin	Y=7834,8X+760	0.997	269	117 - 151
Apigenin-7-O-Glucoside	Y=4536,8X+820	0.997	431	267
Diosmetin	Y=8726,89X+603	0.995	299	-
Hydroxytyrosol	Y=8934X+438	0.997	153	123
Tyrosol	Y=55,832X+264	0.994	137	-
Oleuropein	Y=599,57X+10029	0.997	539	275 - 307
Luteolin	Y=416,87X+1057	0.995	285	133 - 151
Verbascoside	Y=758,32X+182	0.996	623	161 - 461
Luteolin-7-O-Glucoside	Y=3014,3X+616	0.996	447	285
Luteolin-4-O-Glucoside	Y=5681,8X+914	0.997	447	285
Rutin	Y=617,69X+177	0.997	609	301
